# Supplementary material for: Catalyst-free benzylic C(sp3)–H cross-coupling with organotrifluoroborates enabled by electrochemistry
Source: Royal Society of Chemistry journal article supplement (doi:10.1039/d2gc02204d), 2022-01-01
Supplement: d2gc02204d1.pdf [file d2gc02204d1.pdf]

## *Supporting Information*

### **Catalyst-free benzylic C(sp<sup>3</sup>)-H cross-coupling with organotrifluoroborates enabled by electrochemistry**

Chao Li,<sup>a</sup> Ran Ding,<sup>a,c</sup> Heng-Yi Guo,<sup>b</sup> Shuang Xia,<sup>b</sup> Lei Shu,<sup>a</sup> Pei-Long Wang,<sup>\*,a,b</sup>  
and Hongji Li<sup>\*,a</sup>

<sup>a</sup> Key Laboratory of Green and Precise Synthetic Chemistry and Applications, Ministry of Education, School of Chemistry and Materials Science, Huaibei Normal University, Huaibei, Anhui 235000, P. R. China.

<sup>b</sup> Information College, Huaibei Normal University, Huaibei 235000, China.

<sup>c</sup> College of Chemistry and Materials Engineering, Anhui Science and Technology University, Bengbu, Anhui, 233100, P. R. China.

\*Corresponding authors' emails: wangpl@chnu.edu.cn; hongjili@chnu.edu.cn

### *Table of Contents for Supporting Information*

|                                                                                                 |     |
|-------------------------------------------------------------------------------------------------|-----|
| 1. General Considerations.....                                                                  | S1  |
| 2. Typical procedure for the synthesis of 2-chloro-6-(trifluoromethyl)-9 <i>H</i> -xanthene. S1 |     |
| 3. General procedure for the synthesis of potassium benzyltrifluoroborates.....                 | S2  |
| 4. Typical procedure for the synthesis of <b>3a</b> .....                                       | S4  |
| 5. Gram-scale synthesis of <b>3a</b> .....                                                      | S5  |
| 6. Mechanistic experiments.....                                                                 | S6  |
| 6.1 Cyclic Voltammetry studies.....                                                             | S6  |
| 6.2 Radical-trapping experiment with TEMPO.....                                                 | S6  |
| 6.3 Radical-trapping experiment with BHT.....                                                   | S7  |
| 6.4 Radical-trapping experiment with HRMS.....                                                  | S8  |
| 6.5 KIE experiment.....                                                                         | S9  |
| 7. Characterization data for the products.....                                                  | S11 |
| 8. <sup>1</sup> H, <sup>13</sup> C, <sup>19</sup> F NMR Spectra of the products.....            | S34 |
| 9. Crystallographic data for <b>3a</b> .....                                                    | S81 |
| 10. Determination of faradaic efficiency .....                                                  | S82 |
| 11. DFT calculation for mechanism proposal.....                                                 | S83 |
| 12. Oxidation potential measurement of <b>1t</b> and <b>1u</b> .....                            | S84 |
| 13. References .....                                                                            | S84 |

## 1. General Considerations

All  $^1\text{H}$  NMR and  $^{13}\text{C}$  NMR spectra were recorded on a 600 MHz Bruker FT-NMR spectrometer (600 MHz and 151 MHz, respectively). All chemical shifts are given as  $\delta$  value (ppm) with reference to tetramethylsilane (TMS) as an internal standard. The peak patterns are indicated as follows: s, singlet; d, doublet; t, triplet; m, multiplet; q, quartet. The coupling constants,  $J$ , are reported in Hertz (Hz). High resolution mass spectroscopy data of the products were collected on an Agilent Technologies 6540 UHD Accurate-Mass Q-TOF LC/MS (ESI) and a Thermo Fisher Scientific LTQ FTICR-MS instrument. Melting points were determined in open capillary tube using WRS-1B digital melting point apparatus.

The starting materials, such as xanthene and potassium benzyltrifluoroborate reagents, are prepared according to the reported methods.<sup>1,2</sup> All the solvents are commercially available and directly used in this electrochemical system. Products were purified by flash chromatography on silica gels, eluting with petroleum ether.

## 2. Typical procedure for the synthesis of 2-chloro-6-(trifluoromethyl)-9H-xanthene (11).<sup>1</sup>

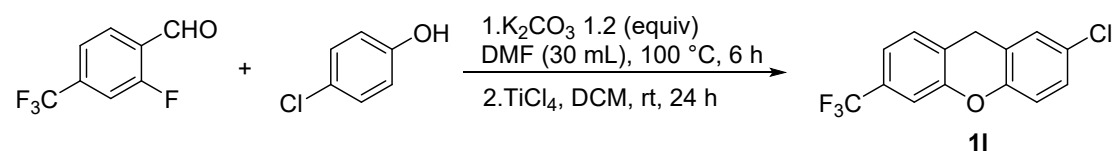

DMF (30 mL), 2-fluoro-4-(trifluoromethyl)benzaldehyde (10 mmol, 1.9 g), 4-chlorophenol (12 mmol, 1.5 g), and potassium carbonate (12 mmol, 1.65 g) were added to a 100 mL round-bottom flask, and the mixture was stirred at 100 °C for 6 h. After addition of water, the reaction solution was extracted with dichloromethane (3 × 100 mL), washed with saturated brine, filtered through  $\text{Na}_2\text{SO}_4$  and dried, and concentrated to obtain the crude product. The crude product does not require further processing.

To a solution of the crude product from the previous step in DCM (10 mL) was added  $\text{TiCl}_4$  (1 M solution in DCM, 40 mL, 4.0 equiv.) at room temperature, and the mixture was stirred at room temperature for 24 h. The reaction was quenched by the

addition of H<sub>2</sub>O, stirred for 30 min, then was extracted three times with DCM (20 mL), washed with brine, dried over Na<sub>2</sub>SO<sub>4</sub>, filtered and concentrated. The residue was purified by silica gel flash column chromatography (PE) to afford the desired products **11**.

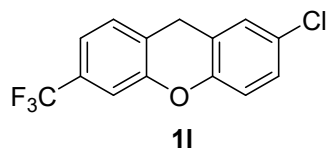

### 2-Chloro-6-(trifluoromethyl)-9H-xanthene (**11**)

The titled compound was obtained as a white powder, 0.9 g (32 % yield).

<sup>1</sup>H NMR (600 MHz, CDCl<sub>3</sub>) δ 7.30 (s, 1H), 7.29–7.28 (m, 2H), 7.19–7.17 (m, 2H), 7.00 (d, *J* = 8.4 Hz, 1H), 4.07 (s, 2H).

<sup>19</sup>F NMR (565 MHz, CDCl<sub>3</sub>) δ -62.69.

EI calcd for C<sub>14</sub>H<sub>8</sub>ClF<sub>3</sub>O<sup>+</sup> [M]<sup>+</sup> 284.0210, found 284.0208.

### 3. General procedure for the synthesis of potassium benzyltrifluoroborates<sup>2</sup>

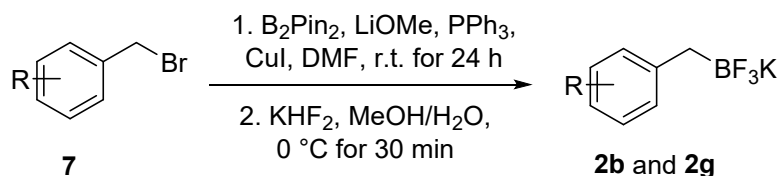

Bis(pinacolato)diboron (11.58 g, 45 mmol, 1.5 equiv), triphenylphosphine (1.02 g, 3.9 mmol, 13 mol%), CuI (0.57 g, 3.0 mmol, 10 mol%), and LiOMe (2.28 g, 60 mmol, 2 equiv), were mixed in 50 mL dry DMF under Ar. Then, benzylic bromide (30 mmol, 1 equiv) was added. The reaction mixture was stirred at room temperature for 24 h under inert atmosphere. The resultant black mixture was decanted into 200 mL water and extracted by EtOAc (3×150 mL). The organic phases were combined and washed with saturated NaCl solution (3×100 mL). After drying under vacuum, the residue was suspended in 100 mL CH<sub>3</sub>OH. And then, KHF<sub>2</sub> (1:1 ratio of KF and HF) (18.7 g, 240 mmol, 8 equiv) in 60 mL water solution was added dropwise at 0 °C over 30 min. The obtained suspension was warmed up to room temperature and concentrated under reduced pressure. The resultant residue was suspended in 50 mL

EtOH and dried by rotary evaporation, which was repeated for 3 times to remove pinacol and H<sub>2</sub>O. The obtained solid was further suspended in hot acetone (3×200 mL) and filtered. The filtrate was dried by rotary evaporation. The resultant residue was further purified by washing with CH<sub>2</sub>Cl<sub>2</sub> (2×20 mL) and hexane (2×30 mL) to afford the desired potassium benzylic trifluoroborate salts.

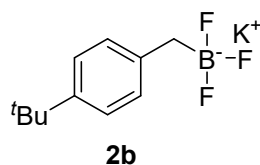

#### Potassium (4-(*tert*-butyl)benzyl)trifluoroborate (**2b**)

The titled compound was obtained as a white powder, 5.5 g (72 % yield).

<sup>1</sup>H NMR (600 MHz, DMSO-*d*<sub>6</sub>) δ 7.01 (d, *J* = 8.4 Hz, 2H), 6.85 (d, *J* = 7.8 Hz, 2H), 1.36 (s, 2H), 1.19 (s, 9H).

<sup>19</sup>F NMR (565 MHz, DMSO-*d*<sub>6</sub>) δ -136.48.

ACPI-MS calcd for C<sub>11</sub>H<sub>15</sub>BF<sub>3</sub><sup>-</sup> [M]<sup>-</sup> 215.1224, found 215.1224.

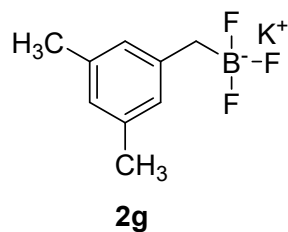

#### Potassium (3,5-dimethylbenzyl)trifluoroborate (**2g**)

The titled compound was obtained as a white powder, 4.5 g (67 % yield).

<sup>1</sup>H NMR (600 MHz, DMSO-*d*<sub>6</sub>) δ 6.55 (s, 2H), 6.45 (s, 1H), 2.10 (s, 6H), 1.34 (s, 2H).

<sup>19</sup>F NMR (565 MHz, DMSO-*d*<sub>6</sub>) δ -136.51.

ACPI-MS calcd for C<sub>9</sub>H<sub>11</sub>BF<sub>3</sub><sup>-</sup> [M]<sup>-</sup> 187.0911, found 187.0911.

#### 4. Typical Procedure for the Synthesis of 3a

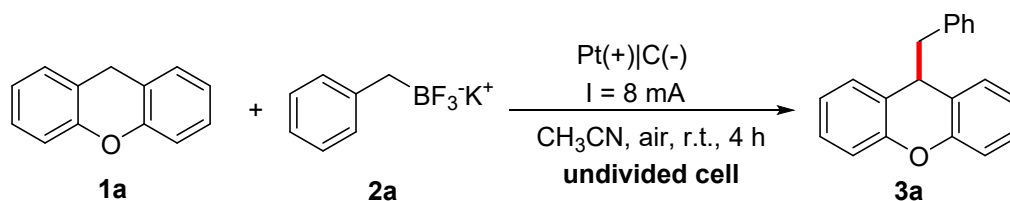

Xanthene (**1a**, 0.30 mmol, 1.0 equiv), potassium benzyltrifluoroborate (**2a**, 0.40 mmol, 1.3 equiv), CH<sub>3</sub>CN (5.0 mL) were sequentially added into a 15.0 mL oven-dried undivided single necked bottle that equipped with a magnetic stirrer bar and sealed with rubber plugs under air atmosphere. A platinum electrode (10 mm×10 mm×0.3 mm) anode and a carbon rod (Φ 6 mm) were used as the cathode in the bottle. About 1.0 cm of the carbon rod was under the solution. The reaction mixture was stirred and electrolyzed at a constant current of 8 mA under air at room temperature for 4 h. When the reaction was complete, the reaction solution was concentrated in vacuum. The resulting crude mixture was purified by flash column chromatography (petroleum ether) to give the desired product **3a** as a white solid (66.5 mg, 81% yield).

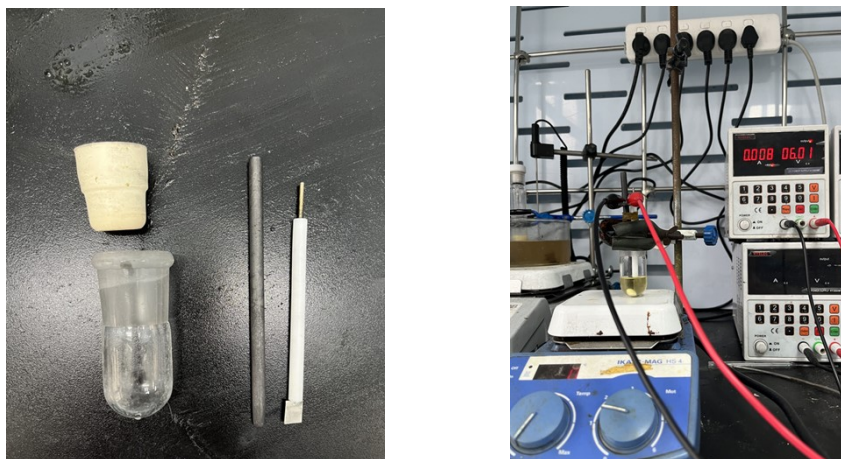

**Figure S1** Experiment setup for the benzylic C(sp<sup>3</sup>)-H cross-coupling with organotrifluoroborates

## 5. Gram-scale Synthesis of **3a**

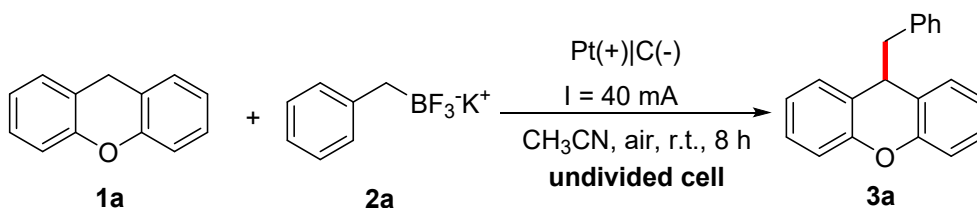

Xanthene (**1a**, 546.6 mg, 3.0 mmol, 1.0 equiv), potassium benzyltrifluoroborate (**2a**, 792.2 mg, 4.0 mmol, 1.3 equiv), CH<sub>3</sub>CN (20 mL) was sequentially added to a 50 mL oven-dried undivided three neck bottle that equipped with a magnetic stirrer bar and sealed with rubber plugs under air atmosphere. A platinum electrode (10 mm×10 mm×0.3 mm) anode and a carbon rod (Φ 6 mm) were used as the cathode in the bottle. About 1.0 cm of the carbon rod was under the solution. The reaction mixture was stirred and electrolyzed at a constant current of 40 mA under air at room temperature for 8 h. When the reaction was complete, the reaction solution was concentrated in vacuum. The resulting crude mixture was purified by flash column chromatography to give the desired product **3a** (562.8 mg, 69 % yield).

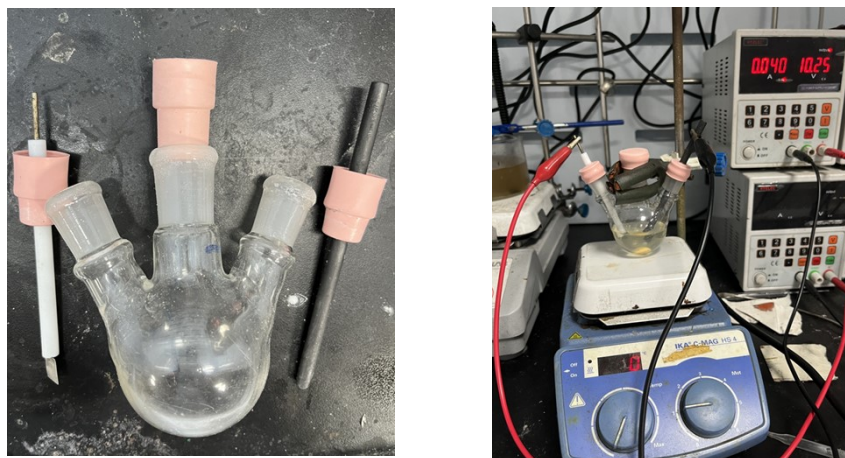

**Figure S2** Experiment setup for the gram-scale synthesis of **3a**.

## 6. Mechanistic experiments

### 6.1 Cyclic voltammetry studies

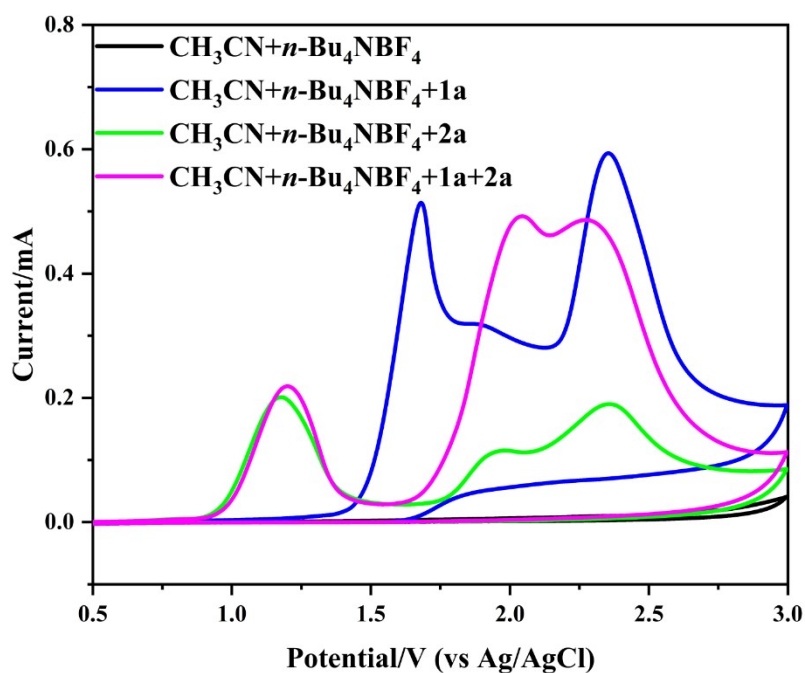

**Figure S3** A cyclic voltammogram recorded in CH<sub>3</sub>CN with 0.1 M *n*-Bu<sub>4</sub>NBF<sub>4</sub> as the supporting electrolyte. **1a** (1 mM), **2a** (1 mM), **1a+2a** (1 mM).

Cyclic voltammetry was performed in a three electrode cell connected to a Schlenk line at room temperature. The working electrode was a glassy carbon electrode, and the counter electrode was a platinum electrode. The reference was an Ag/AgCl wire, and CH<sub>3</sub>CN (10 mL) containing 0.1 M *n*-Bu<sub>4</sub>NBF<sub>4</sub> was poured into the electrochemical cell in all experiments. Under ambient conditions, the LK98C electrochemical workstation was used with an applied potential range of 0.5 V to 3.0 V and a scan rate of 0.1 V/s. The test concentrations of **1a**, **2a** and **1a+2a** are 1 mM, respectively.

### 6.2 Radical-trapping experiment with TEMPO

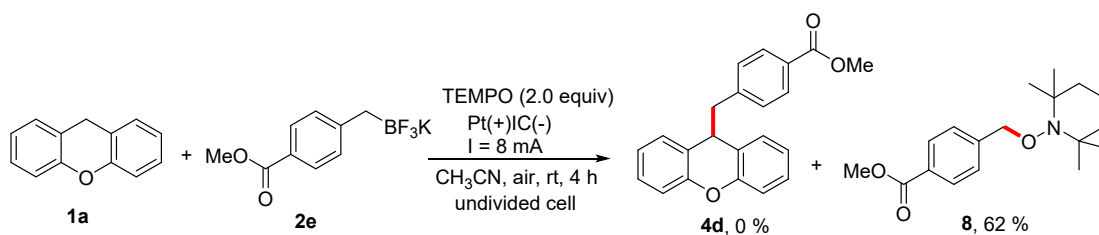

Xanthene **1a** (0.30 mmol, 1.0 equiv), **2e** (0.40 mmol, 1.3 equiv), TEMPO (0.6 mmol, 2.0 equiv), CH<sub>3</sub>CN (5.0 mL) were sequentially added into a 15.0 mL oven-dried undivided single necked bottle that equipped with a magnetic stirrer bar and sealed with rubber plugs under air atmosphere. A platinum electrode (10 mm×10 mm×0.3 mm) anode and a carbon rod (Φ 6 mm) were used as the cathode in the bottle. About 1.0 cm of the carbon rod was under the solution. The reaction mixture was stirred and electrolyzed at a constant current of 8 mA under air at room temperature for 4 h. When the reaction was complete, the reaction solution was concentrated in vacuum. The resulting crude mixture was purified by flash column chromatography (petroleum ether/ethylacetate = 50:1) to give the desired product **8** (75.8 mg, 62%).

### 6.3 Radical-trapping experiment with BHT

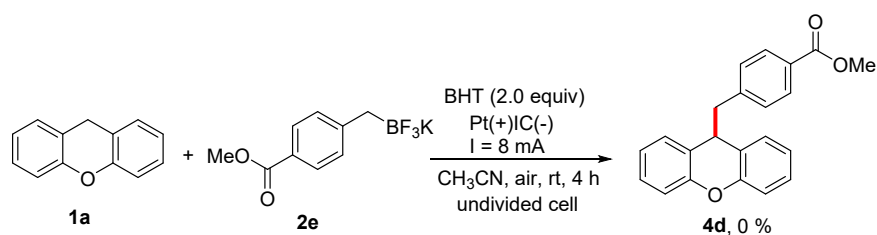

Xanthene **1a** (0.30 mmol, 1.0 equiv), **2e** (0.40 mmol, 1.3 equiv), BHT (0.6 mmol, 2.0 equiv), CH<sub>3</sub>CN (5.0 mL) were sequentially added into a 15.0 mL oven-dried undivided single necked bottle that equipped with a magnetic stirrer bar and sealed with rubber plugs under air atmosphere. A platinum electrode (10 mm×10 mm×0.3 mm) anode and a carbon rod (Φ 6 mm) were used as the cathode in the bottle. About 1.0 cm of the carbon rod was under the solution. The reaction mixture was stirred and electrolyzed at a constant current of 8 mA under air at room temperature for 4 h.



## 6.4 Radical-trapping experiment with HRMS

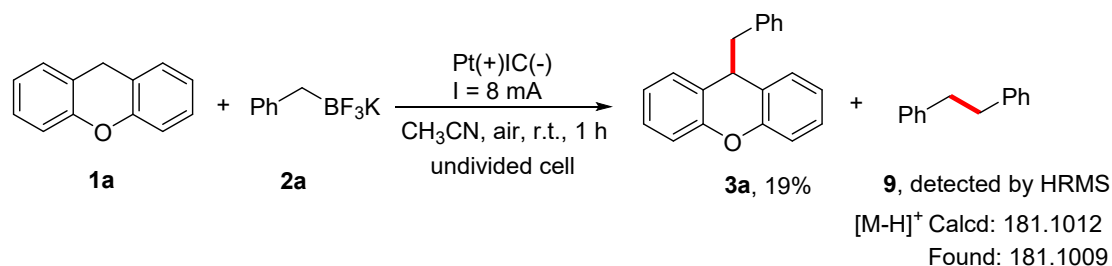

Xanthene (**1a**, 0.30 mmol, 1.0 equiv), potassium benzyltrifluoroborate (**2a**, 0.40 mmol, 1.3 equiv), CH<sub>3</sub>CN (5.0 mL) were sequentially added into a 15.0 mL oven-dried undivided single necked bottle that equipped with a magnetic stirrer bar and sealed with rubber plugs under air atmosphere. A platinum electrode (10 mm×10 mm×0.3 mm) anode and a carbon rod (Φ 6 mm) were used as the cathode in the bottle. About 1.0 cm of the carbon rod was under the solution. The reaction mixture was stirred and electrolyzed at a constant current of 8 mA under air at room temperature for 1 h. After completion of the reaction, the resulted mixture is detected by HRMS (Figures S3, data of [M-H]<sup>+</sup> was showed). The reaction solution was concentrated in vacuum. The resulting crude mixture was purified by flash column chromatography (petroleum ether) to give the desired product **3a** (15.7 mg, 19%).

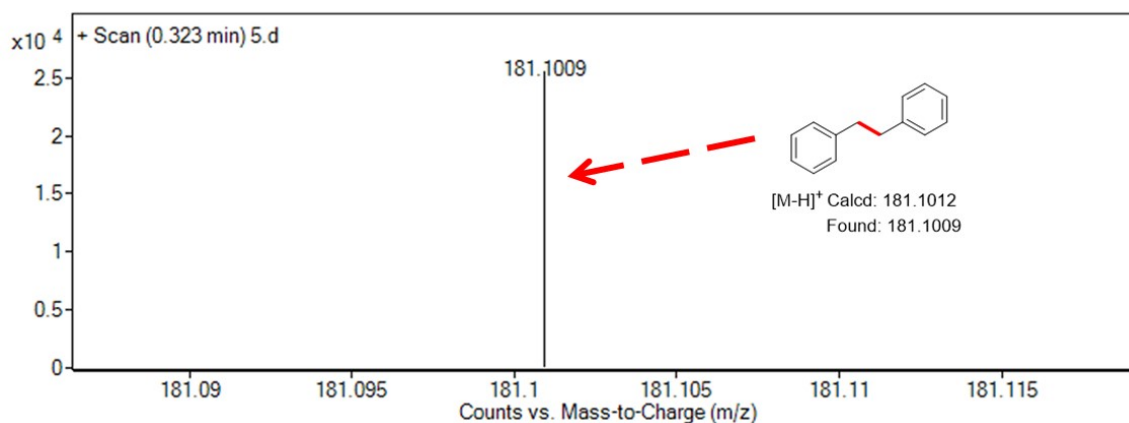

**Figure S4** Detection of **9** with HRMS

## 6.5 KIE experiments

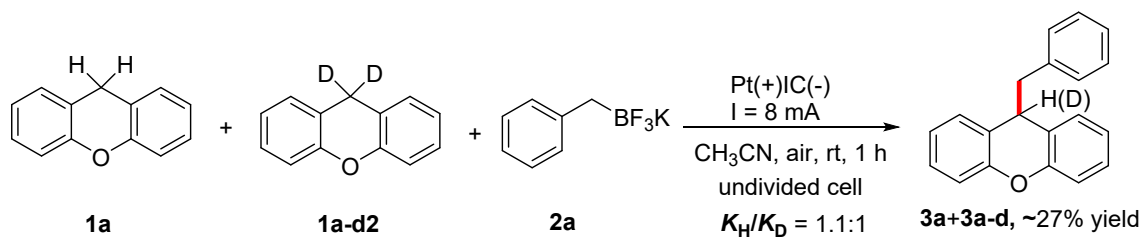

Xanthene **1a** (0.15 mmol, 1.0 equiv), **1a-d2** (0.15 mmol, 1.0 equiv), **2a** (0.40 mmol, 1.3 equiv), CH<sub>3</sub>CN (5.0 mL) were sequentially added into a 15.0 mL oven-dried undivided single necked bottle that equipped with a magnetic stirrer bar and sealed with rubber plugs under air atmosphere. A platinum electrode (10 mm×10 mm×0.3 mm) anode and a carbon rod (Φ 6 mm) were used as the cathode in the bottle. About 1.0 cm of the carbon rod was under the solution. The reaction mixture was stirred and electrolyzed at a constant current of 8 mA under air at room temperature for 1 h. After that, the mixture in reaction tube was detected by TLC. The crude product was purified by flash chromatography (silica gel, petroleum ether), affording the desired product **3a** and **3a-d** as a White solid (22.1 mg, 27% yield). The ratio of **3a/3a-d** was determined as 1.1:1 by <sup>1</sup>H NMR analysis.

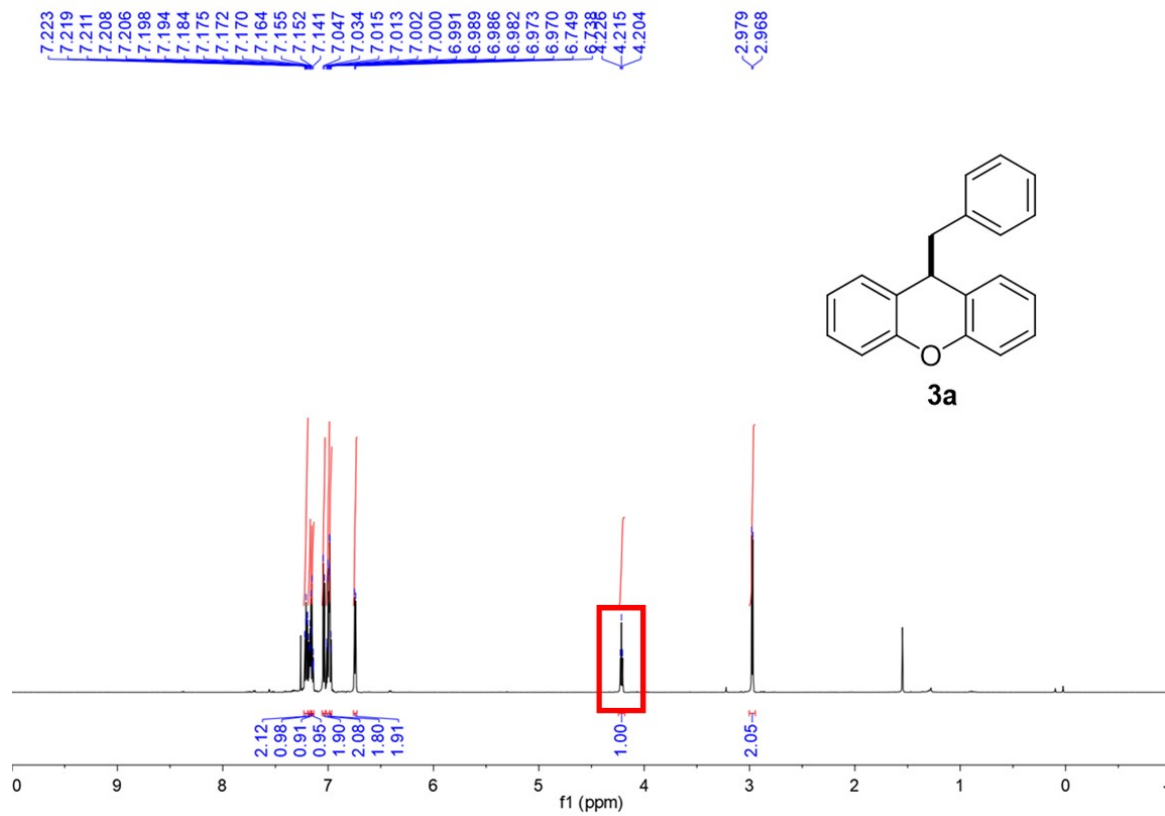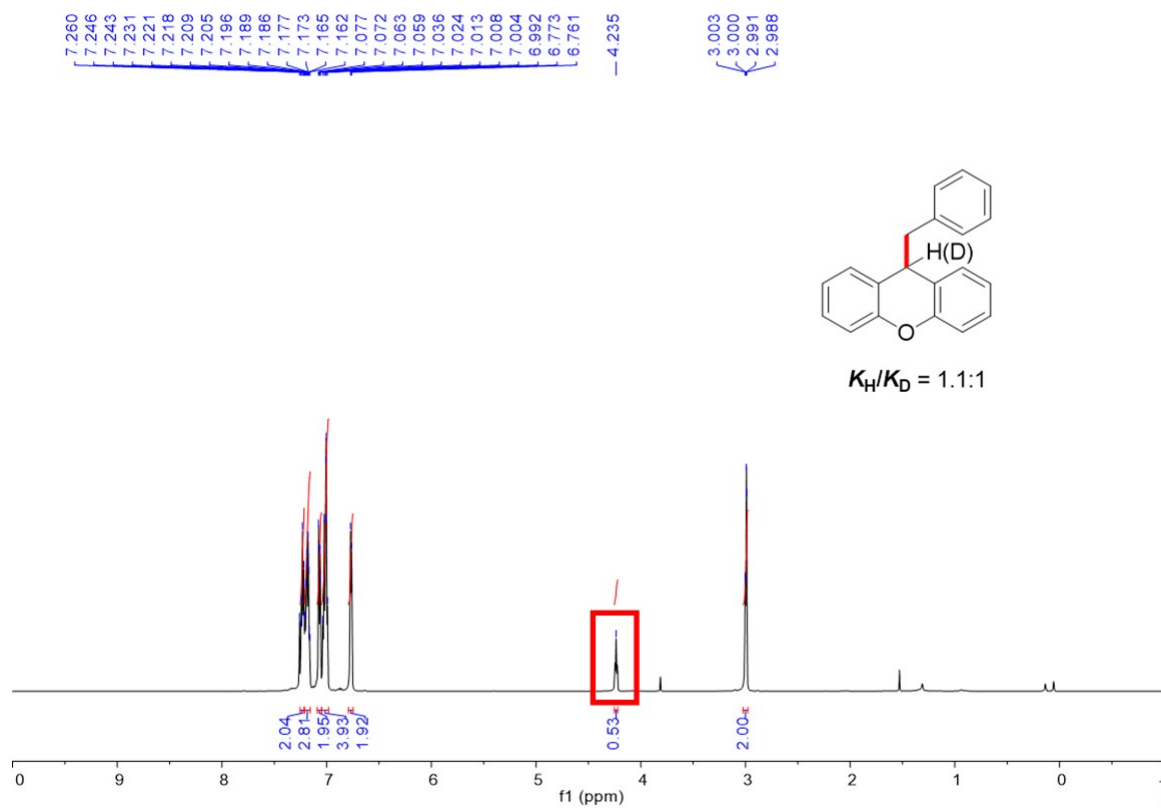

## 7. Characterization data for the products

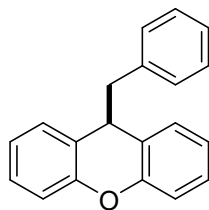

**3a**

**9-Benzyl-9H-xanthene (3a)**<sup>3</sup>: Prepared following general procedure and the reaction mixture was purified by flash column chromatography with petroleum ether (PE) to afford the product **3a** (66.5 mg, 81% yield).

White solid; m.p.: 122.1~124.4 °C.

<sup>1</sup>H NMR (600 MHz, CDCl<sub>3</sub>) δ 7.22–7.19 (m, 2H), 7.18–7.17 (m, 1H), 7.16 (d, *J* = 5.4 Hz, 1H), 7.15–7.14 (m, 1H), 7.04 (d, *J* = 7.8 Hz, 2H), 7.02–6.99 (m, 2H), 6.99–6.97 (m, 2H), 6.74 (d, *J* = 6.6 Hz, 2H), 4.22 (t, *J* = 6.6 Hz, 1H), 2.97 (d, *J* = 6.6 Hz, 2H).

<sup>13</sup>C NMR (151 MHz, CDCl<sub>3</sub>) δ 152.3, 138.1, 129.8, 128.9, 127.8, 127.6, 126.2, 124.6, 122.8, 116.2, 47.5, 41.7.

HRMS (ESI) calcd for C<sub>20</sub>H<sub>15</sub>O<sup>+</sup> [M-H]<sup>+</sup> 271.1129, found 271.1127.

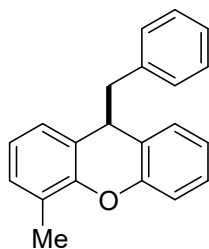

**3b**

**9-Benzyl-4-methyl-9H-xanthene (3b)**: Prepared following general procedure and the reaction mixture was purified by flash column chromatography with petroleum ether (PE) to afford the product **3b** (61.7 mg, 72% yield).

White solid; m.p.: 104.3~106.2 °C.

<sup>1</sup>H NMR (600 MHz, CDCl<sub>3</sub>) δ 7.22 (t, *J* = 7.8 Hz, 1H), 7.19 – 7.17 (m, 3H), 7.11 (d, *J* = 8.4 Hz, 1H), 7.08 (d, *J* = 7.2 Hz, 1H), 6.99 (t, *J* = 7.2 Hz, 1H), 6.92 (t, *J* = 7.8 Hz, 2H), 6.84 (d, *J* = 7.8 Hz, 1H), 6.79 (d, *J* = 7.8 Hz, 2H), 4.18 (t, *J* = 6.6 Hz, 1H), 2.99–2.92 (m, 2H), 2.38 (s, 3H).

$^{13}\text{C}$  NMR (151 MHz,  $\text{CDCl}_3$ )  $\delta$  152.4, 150.5, 138.4, 129.8, 128.9, 128.8, 127.8, 127.4, 126.3, 126.2, 125.4, 124.9, 124.4, 122.7, 122.3, 116.3, 47.5, 42.1, 15.8.  
ACPI-MS calcd for  $\text{C}_{21}\text{H}_{19}\text{O}^+$   $[\text{M}+\text{H}]^+$  287.1430, found 287.1431.

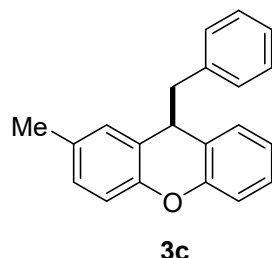

**9-Benzyl-2-methyl-9H-xanthene (3c):** Prepared following general procedure and the reaction mixture was purified by flash column chromatography with petroleum ether (PE) to afford the product **3c** (66.9 mg, 78% yield).

White solid; m.p.: 105.2~107.4 °C.

$^1\text{H}$  NMR (600 MHz,  $\text{CDCl}_3$ )  $\delta$  7.21–7.16 (m, 4H), 7.03 (t,  $J = 9.6$  Hz, 2H), 6.98 (t,  $J = 7.2$  Hz, 1H), 6.95–6.93 (m, 2H), 6.78 (s, 1H), 6.76 (d,  $J = 7.2$  Hz, 2H), 4.16 (t,  $J = 6.6$  Hz, 1H), 3.00–2.94 (m, 2H), 2.29 (s, 3H).

$^{13}\text{C}$  NMR (151 MHz,  $\text{CDCl}_3$ )  $\delta$  152.4, 150.1, 138.3, 132.1, 129.8, 129.2, 128.9, 128.2, 127.8, 127.5, 126.2, 124.5, 124.3, 122.6, 116.2, 115.9, 47.5, 41.8, 20.7.

ACPI-MS calcd for  $\text{C}_{21}\text{H}_{19}\text{O}^+$   $[\text{M}+\text{H}]^+$  287.1430, found 287.1433.

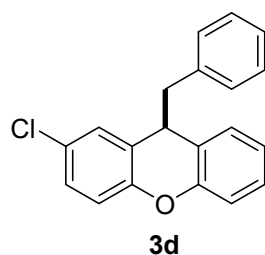

**9-Benzyl-2-chloro-9H-xanthene (3d):** Prepared following general procedure and the reaction mixture was purified by flash column chromatography with petroleum ether (PE) to afford the product **3d** (59.9 mg, 65% yield).

White solid; m.p.: 112.5~114.6°C.

$^1\text{H}$  NMR (600 MHz,  $\text{CDCl}_3$ )  $\delta$  7.23 (d,  $J = 7.8$  Hz, 1H), 7.20 (d,  $J = 7.2$  Hz, 1H), 7.17 (m,  $J = 6.6$  Hz, 3H), 7.03–7.02 (m, 2H), 6.98 (d,  $J = 7.8$  Hz, 1H), 6.96 (d,  $J = 8.4$  Hz,

1H), 6.95 (s, 1H), 6.73 (d,  $J = 7.8$  Hz, 2H), 4.16 (t,  $J = 6.6$  Hz, 1H), 2.97 (d,  $J = 6.0$  Hz, 2H).

$^{13}\text{C}$  NMR (151 MHz,  $\text{CDCl}_3$ )  $\delta$  151.9, 150.8, 137.5, 129.7, 128.8, 128.5, 127.9, 127.8, 127.6, 127.4, 126.5, 126.2, 123.7, 123.1, 117.5, 116.2, 47.3, 41.6.

ACPI-MS calcd for  $\text{C}_{20}\text{H}_{14}\text{OCl}^+$   $[\text{M}-\text{H}]^+$  305.0728, found 305.0729.

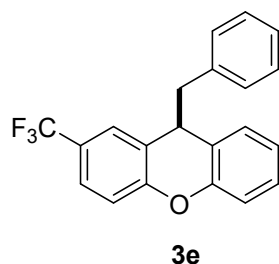

**9-Benzyl-2-(trifluoromethyl)-9H-xanthene (3e):** Prepared following general procedure and the reaction mixture was purified by flash column chromatography with petroleum ether (PE) to afford the product **3e** (63.7 mg, 62% yield).

White solid; m.p.: 103.1~105.4 °C.

$^1\text{H}$  NMR (600 MHz,  $\text{CDCl}_3$ )  $\delta$  7.45 (d,  $J = 8.4$  Hz, 1H), 7.25–7.22 (m, 1H), 7.19 (t,  $J = 7.2$  Hz, 1H), 7.15 (t,  $J = 7.2$  Hz, 2H), 7.12–7.07 (m, 2H), 7.06–7.04 (m, 3H), 6.70 (d,  $J = 6.6$  Hz, 2H), 4.22 (t,  $J = 6.6$  Hz, 1H), 3.00 (dd,  $J = 13.2, 6.6$  Hz, 1H), 2.93 (dd,  $J = 13.2, 6.6$  Hz, 1H).

$^{13}\text{C}$  NMR (151 MHz,  $\text{CDCl}_3$ )  $\delta$  154.6, 151.6, 137.4, 129.7, 128.8, 128.0, 128.0, 126.6, 126.5, 126.4 (q,  $J = 3.8$  Hz), 124.9, 124.9, 124.0, 123.6, 122.3 (q,  $J = 267.9$  Hz), 116.6, 116.4, 47.5, 41.6.

$^{19}\text{F}$  NMR (565 MHz,  $\text{CDCl}_3$ )  $\delta$  -57.9.

ACPI-MS calcd for  $\text{C}_{21}\text{H}_{14}\text{OF}_3^+$   $[\text{M}-\text{H}]^+$  339.0991, found 339.0995.

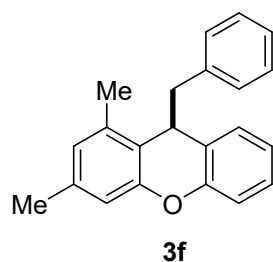

**9-Benzyl-1,3-dimethyl-9H-xanthene (3f):** Prepared following general procedure and the reaction mixture was purified by flash column chromatography with petroleum ether (PE) to afford the product **3f** (53.4 mg, 59% yield).

White solid; m.p.: 116.3.1~118.0 °C.

<sup>1</sup>H NMR (600 MHz, CDCl<sub>3</sub>) δ 7.20–7.16 (m, 4H), 7.05 (d, *J* = 7.8 Hz, 1H), 6.90 (t, *J* = 7.2 Hz, 1H), 6.79 (s, 2H), 6.74 (d, *J* = 6.6 Hz, 2H), 6.71 (d, *J* = 7.8 Hz, 1H), 4.22 (dd, *J* = 7.8, 4.8 Hz, 1H), 2.96 (dd, *J* = 13.2, 5.4 Hz, 1H), 2.77 (dd, *J* = 12.6, 7.8 Hz, 1H), 2.34 (s, 3H), 2.33 (s, 3H).

<sup>13</sup>C NMR (151 MHz, CDCl<sub>3</sub>) δ 152.8, 152.7, 138.5, 137.0, 135.7, 129.7, 128.9, 127.9, 127.4, 126.2, 125.9, 125.4, 122.3, 121.2, 116.0, 114.8, 44.9, 39.3, 21.0, 18.3.

ACPI-MS calcd for C<sub>22</sub>H<sub>21</sub>O<sup>+</sup> [M+H]<sup>+</sup> 301.1587, found 301.1588.

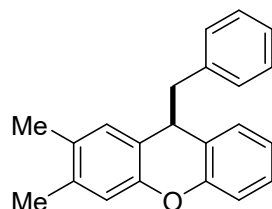

**3g**

**9-Benzyl-2,3-dimethyl-9H-xanthene (3g):** Prepared following general procedure and the reaction mixture was purified by flash column chromatography with petroleum ether (PE) to afford the product **3g** (63.1 mg, 70% yield).

White solid; m.p.: 118.2~120.4 °C.

<sup>1</sup>H NMR (600 MHz, CDCl<sub>3</sub>) δ 7.21–7.17 (m, 4H), 7.03 (d, *J* = 8.4 Hz, 1H), 6.96 (t, *J* = 7.8 Hz, 1H), 6.90 (d, *J* = 7.8 Hz, 1H), 6.86 (s, 1H), 6.79 (d, *J* = 7.8 Hz, 2H), 6.76 (s, 1H), 4.15 (t, *J* = 7.2 Hz, 1H), 3.01–2.93 (m, 2H), 2.27 (s, 3H), 2.20 (s, 3H).

<sup>13</sup>C NMR (151 MHz, CDCl<sub>3</sub>) δ 152.4, 150.1, 138.5, 135.9, 130.8, 129.8, 129.5, 129.0, 127.8, 127.4, 126.1, 124.6, 122.4, 121.7, 117.0, 116.1, 47.6, 41.3, 19.6, 18.9.

ACPI-MS calcd for C<sub>22</sub>H<sub>21</sub>O<sup>+</sup> [M+H]<sup>+</sup> 301.1587, found 301.1587.

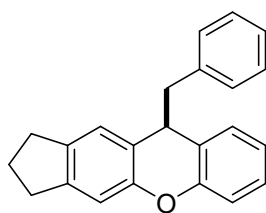

**3h**

**10-Benzyl-1,2,3,10-tetrahydrocyclopenta[b]xanthene (3h):** Prepared following general procedure and the reaction mixture was purified by flash column chromatography with petroleum ether (PE) to afford the product **3h** (69.1 mg, 74% yield).

White solid; m.p.: 101.6.1~103.5 °C.

<sup>1</sup>H NMR (600 MHz, CDCl<sub>3</sub>) δ 7.19–7.16 (m, 4H), 7.03 (d, *J* = 8.4 Hz, 1H), 6.95 (d, *J* = 7.2 Hz, 1H), 6.93 (s, 1H), 6.86 (d, *J* = 7.8 Hz, 1H), 6.85 (s, 1H), 6.79 (d, *J* = 6.0 Hz, 2H), 4.14 (t, *J* = 6.6 Hz, 1H), 2.98 (dd, *J* = 13.2, 6.0 Hz, 1H), 2.95–2.87 (m, 3H), 2.84 (t, *J* = 7.2 Hz, 2H), 2.14–2.05 (m, 2H).

<sup>13</sup>C NMR (151 MHz, CDCl<sub>3</sub>) δ 152.6, 151.0, 143.8, 138.6, 138.5, 129.8, 128.9, 127.8, 127.4, 126.1, 124.8, 124.0, 122.6, 122.4, 116.1, 112.0, 47.6, 42.2, 32.8, 32.1, 25.8.

ACPI-MS calcd for C<sub>23</sub>H<sub>21</sub>O<sup>+</sup> [M+H]<sup>+</sup> 313.1587, found 313.1589.

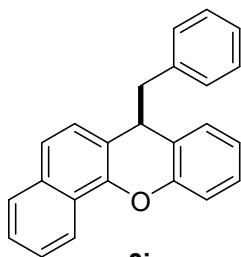

**3i**

**7-Benzyl-7H-benzo[c]xanthene (3i):** Prepared following general procedure and the reaction mixture was purified by flash column chromatography with petroleum ether (PE) to afford the product **3i** (70.2 mg, 73% yield).

White solid; m.p.: 133.6~134.8 °C.

<sup>1</sup>H NMR (600 MHz, CDCl<sub>3</sub>) δ 8.38 (d, *J* = 7.8 Hz, 1H), 7.82 (d, *J* = 7.8 Hz, 1H), 7.55 (t, *J* = 7.2 Hz, 1H), 7.50 (t, *J* = 8.4 Hz, 2H), 7.27–7.25 (m, 1H), 7.22 (d, *J* = 7.8 Hz, 1H), 7.18 (t, *J* = 6.6 Hz, 1H), 7.13 (t, *J* = 7.8 Hz, 2H), 7.08 (d, *J* = 8.4 Hz, 1H), 7.05 (t,



$J = 6.6$  Hz, 1H), 7.02 (d,  $J = 7.2$  Hz, 1H), 6.78 (d,  $J = 7.2$  Hz, 2H), 4.36 (t,  $J = 6.6$  Hz, 1H), 3.09–3.02 (m, 2H).

$^{13}\text{C}$  NMR (151 MHz,  $\text{CDCl}_3$ )  $\delta$  152.2, 147.0, 138.2, 133.3, 129.8, 128.9, 127.9, 127.6, 127.46, 126.6, 126.2, 126.0, 125.7, 124.5, 124.1, 123.1, 122.3, 121.5, 118.5, 116.4, 47.4, 41.8.

ACPI-MS calcd for  $\text{C}_{24}\text{H}_{19}\text{O}^+$   $[\text{M}+\text{H}]^+$  323.1430, found 323.1432.

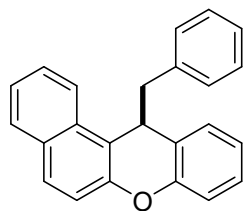

**3j**

**12-Benzyl-12H-benzo[a]xanthene (3j):** Prepared following general procedure and the reaction mixture was purified by flash column chromatography with petroleum ether (PE) to afford the product **3j** (63.8 mg, 66% yield).

White solid; m.p.: 131.6~132.4 °C.

$^1\text{H}$  NMR (600 MHz,  $\text{CDCl}_3$ )  $\delta$  8.17 (d,  $J = 8.4$  Hz, 1H), 7.89 (d,  $J = 7.8$  Hz, 1H), 7.75 (d,  $J = 9.0$  Hz, 1H), 7.62 (t,  $J = 7.2$  Hz, 1H), 7.47 (t,  $J = 7.2$  Hz, 1H), 7.23 (t,  $J = 8.4$  Hz, 2H), 7.17 (t,  $J = 7.8$  Hz, 1H), 7.10 (t,  $J = 7.2$  Hz, 2H), 7.07 (d,  $J = 7.8$  Hz, 1H), 7.01 (t,  $J = 7.8$  Hz, 1H), 6.91 (d,  $J = 7.8$  Hz, 1H), 6.62 (d,  $J = 7.8$  Hz, 2H), 4.95 (dd,  $J = 7.8, 4.2$  Hz, 1H), 3.17 (dd,  $J = 13.2, 4.2$  Hz, 1H), 3.01 (dd,  $J = 13.2, 8.4$  Hz, 1H).

$^{13}\text{C}$  NMR (151 MHz,  $\text{CDCl}_3$ )  $\delta$  152.1, 150.1, 138.1, 131.2, 130.7, 129.8, 129.2, 128.9, 128.32, 127.7, 127.6, 126.7, 126.2, 124.0, 123.8, 122.9, 122.0, 117.8, 116.5, 115.9, 44.6, 37.7.

HRMS (ESI) calcd for  $\text{C}_{24}\text{H}_{17}\text{O}^+$   $[\text{M}-\text{H}]^+$  321.1284, found 321.1281.

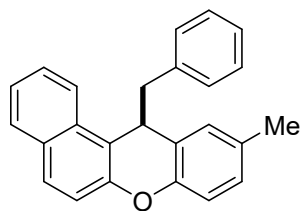

**3k**

**12-Benzyl-10-methyl-12*H*-benzo[*a*]xanthene (3k):** Prepared following general procedure and the reaction mixture was purified by flash column chromatography with petroleum ether (PE) to afford the product **3k** (76.5 mg, 76% yield).

White solid; m.p.: 135.1~136.5 °C.

<sup>1</sup>H NMR (600 MHz, CDCl<sub>3</sub>) δ 8.13 (d, *J* = 8.4 Hz, 1H), 7.87 (d, *J* = 7.8 Hz, 1H), 7.73 (d, *J* = 8.4 Hz, 1H), 7.60 (t, *J* = 7.2 Hz, 1H), 7.45 (t, *J* = 7.2 Hz, 1H), 7.21 (d, *J* = 9.0 Hz, 1H), 7.15 (t, *J* = 7.2 Hz, 1H), 7.09 (t, *J* = 7.2 Hz, 2H), 7.01 (d, *J* = 8.4 Hz, 1H), 6.94 (d, *J* = 7.8 Hz, 1H), 6.67 (s, 1H), 6.60 (d, *J* = 7.2 Hz, 2H), 4.87 (dd, *J* = 7.8, 5.4 Hz, 1H), 3.15 (dd, *J* = 13.2, 4.2 Hz, 1H), 2.98 (dd, *J* = 13.2, 7.8 Hz, 1H), 2.25 (s, 3H).

<sup>13</sup>C NMR (151 MHz, CDCl<sub>3</sub>) δ 150.3, 145.0, 138.2, 132.1, 131.3, 130.6, 129.8, 129.5, 128.8, 128.2, 128.1, 127.6, 126.7, 126.2, 123.9, 123.4, 122.0, 117.8, 116.4, 115.5, 44.6, 37.8, 20.7.

ACPI-MS calcd for C<sub>25</sub>H<sub>21</sub>O<sup>+</sup> [M+H]<sup>+</sup> 337.1587, found 337.1584.

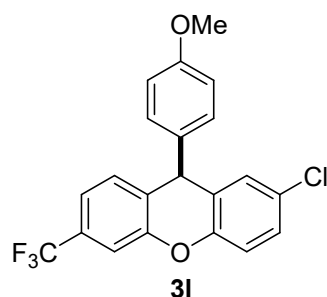

**2-chloro-9-(4-methoxyphenyl)-6-(trifluoromethyl)-9*H*-xanthene (3l):** Prepared following general procedure and the reaction mixture was purified by flash column chromatography with petroleum ether and ethylacetate (PE/EA = 100:1) to afford the product **3l** (59.4 mg, 51% yield).

White solid; m.p.: 125.3~126.8 °C.

<sup>1</sup>H NMR (600 MHz, CDCl<sub>3</sub>) δ 7.38 (s, 1H), 7.22 (d, *J* = 8.4 Hz, 1H), 7.18 (dd, *J* = 8.4, 2.4 Hz, 1H), 7.13 (d, *J* = 7.8 Hz, 1H), 7.09–7.07 (m, 3H), 7.00 (d, *J* = 1.8 Hz, 1H), 6.85 (d, *J* = 8.4 Hz, 2H), 5.18 (s, 1H), 3.78 (s, 3H).

<sup>13</sup>C NMR (151 MHz, CDCl<sub>3</sub>) δ 158.8, 150.7, 149.1, 137.1, 131.0, 130.4, 129.5, 129.3, 128.5, 128.3, 125.4 (q, *J* = 272.0 Hz), 127.8, 125.6, 120.0 (q, *J* = 7.2 Hz), 118.0, 114.5, 114.0 (q, *J* = 4.4 Hz), 55.3, 43.3.

$^{19}\text{F}$  NMR (565 MHz,  $\text{CDCl}_3$ )  $\delta$  -62.7.

EI calcd for  $\text{C}_{21}\text{H}_{14}\text{ClF}_3\text{O}_2^+$   $[\text{M}]^+$  390.0629, found 390.0635.

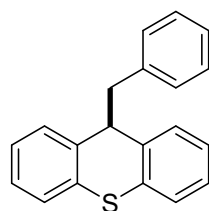

**3m**

**9-Benzyl-9H-thioxanthene (3m):** Prepared following general procedure and the reaction mixture was purified by flash column chromatography with petroleum ether and ethylacetate (PE/EA = 100:1) to afford the product **3m** (59.6 mg, 69% yield).

White solid; m.p.: 126.1~128.5 °C.

$^1\text{H}$  NMR (600 MHz,  $\text{CDCl}_3$ )  $\delta$  7.44 (d,  $J$  = 7.8 Hz, 2H), 7.20–7.16 (m, 5H), 7.09 (t,  $J$  = 7.2 Hz, 2H), 6.96 (d,  $J$  = 7.8 Hz, 2H), 6.85–6.83 (m, 2H), 4.19 (t,  $J$  = 7.8 Hz, 1H), 3.01 (d,  $J$  = 7.8 Hz, 2H).

$^{13}\text{C}$  NMR (151 MHz,  $\text{CDCl}_3$ )  $\delta$  139.3, 137.2, 132.2, 129.5, 129.2, 127.9, 126.7, 126.5, 126.2, 126.0, 52.2, 38.9.

ACPI-MS calcd for  $\text{C}_{20}\text{H}_{17}\text{S}^+$   $[\text{M}+\text{H}]^+$  289.1045, found 289.1042.

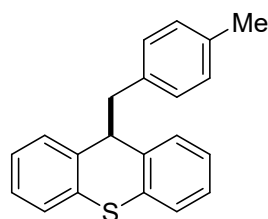

**3n**

**9-(4-Methylbenzyl)-9H-thioxanthene (3n):** Prepared following general procedure and the reaction mixture was purified by flash column chromatography with petroleum ether and ethylacetate (PE/EA = 100:1) to afford the product **3n** (66.4 mg, 73% yield).

White solid; m.p.: 129.3~130.6 °C.

$^1\text{H}$  NMR (600 MHz,  $\text{CDCl}_3$ )  $\delta$  7.45 (d,  $J$  = 7.8 Hz, 2H), 7.20 (t,  $J$  = 7.2 Hz, 2H), 7.12 (t,  $J$  = 7.8 Hz, 2H), 6.99 (t,  $J$  = 7.2 Hz, 4H), 6.75 (d,  $J$  = 7.8 Hz, 2H), 4.18 (t,  $J$  = 7.8 Hz, 1H), 2.99 (d,  $J$  = 7.8 Hz, 2H), 2.32 (s, 3H).

$^{13}\text{C}$  NMR (151 MHz,  $\text{CDCl}_3$ )  $\delta$  137.4, 136.2, 135.4, 132.1, 129.3, 129.2, 128.6, 126.6, 126.4, 126.2, 52.2, 38.5, 21.0.

ACPI-MS calcd for  $\text{C}_{21}\text{H}_{19}\text{S}^+$   $[\text{M}+\text{H}]^+$  303.1202, found 303.1203.

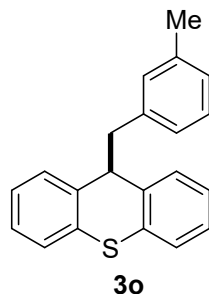

**9-(3-Methylbenzyl)-9H-thioxanthene (3o):** Prepared following general procedure and the reaction mixture was purified by flash column chromatography with petroleum ether and ethylacetate (PE/EA = 100:1) to afford the product **3o** (63.4 mg, 70% yield).

White solid; m.p.: 116.1~118.4 °C.

$^1\text{H}$  NMR (600 MHz,  $\text{CDCl}_3$ )  $\delta$  7.46 (d,  $J = 7.8$  Hz, 2H), 7.21 (t,  $J = 7.2$ , 2H), 7.12 (t,  $J = 7.8$ , 2H), 7.08 (t,  $J = 7.8$  Hz, 1H), 6.99 (t,  $J = 7.2$  Hz, 3H), 6.66 (d,  $J = 6.0$  Hz, 2H), 4.19 (t,  $J = 7.8$  Hz, 1H), 3.00 (d,  $J = 7.8$  Hz, 2H), 2.27 (s, 3H).

$^{13}\text{C}$  NMR (151 MHz,  $\text{CDCl}_3$ )  $\delta$  139.1, 137.4, 137.3, 132.1, 130.4, 129.2, 127.7, 126.7, 126.6, 126.5, 126.1, 52.1, 38.8, 21.3.

ACPI-MS (ESI) calcd for  $\text{C}_{21}\text{H}_{19}\text{S}^+$   $[\text{M}+\text{H}]^+$  303.1202, found 303.1202.

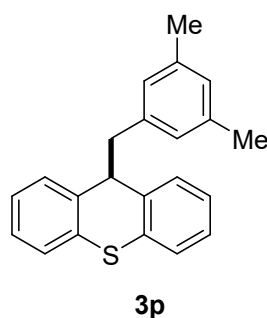

**9-(3,5-Dimethylbenzyl)-9H-thioxanthene (3p):** Prepared following general procedure and the reaction mixture was purified by flash column chromatography with petroleum ether and ethylacetate (PE/EA = 100:1) to afford the product **3p** (64.9 mg, 68% yield).

White solid; m.p.: 119.8~120.4 °C.

$^1\text{H}$  NMR (600 MHz,  $\text{CDCl}_3$ )  $\delta$  7.49 (d,  $J = 7.8$  Hz, 2H), 7.23 (t,  $J = 7.8$  Hz, 2H), 7.14 (t,  $J = 7.2$  Hz, 2H), 7.01 (d,  $J = 7.2$  Hz, 2H), 6.85 (s, 1H), 6.48 (s, 2H), 4.20 (t,  $J = 7.8$  Hz, 1H), 2.99 (d,  $J = 7.8$  Hz, 2H), 2.25 (s, 6H).

$^{13}\text{C}$  NMR (151 MHz,  $\text{CDCl}_3$ )  $\delta$  139.1, 137.4, 137.2, 132.1, 129.3, 127.5, 127.4, 126.6, 126.4, 126.0, 52.1, 38.8, 21.1.

ACPI-MS calcd for  $\text{C}_{22}\text{H}_{21}\text{S}^+$   $[\text{M}+\text{H}]^+$  317.1358, found 317.1358.

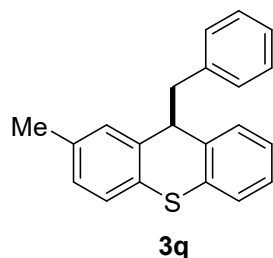

**9-Benzyl-2-methyl-9H-thioxanthene (3q):** Prepared following general procedure and the reaction mixture was purified by flash column chromatography with petroleum ether and ethylacetate (PE/EA = 100:1) to afford the product **3q** (64.6 mg, 71% yield).

White solid; m.p.: 125.3~126.4 °C.

$^1\text{H}$  NMR (600 MHz,  $\text{CDCl}_3$ )  $\delta$  7.44 (d,  $J = 7.8$  Hz, 1H), 7.34 (d,  $J = 7.8$  Hz, 1H), 7.20–7.17 (m, 4H), 7.07 (t,  $J = 7.8$  Hz, 1H), 7.02 (d,  $J = 8.4$  Hz, 1H), 6.90 (d,  $J = 7.8$  Hz, 1H), 6.86–6.84 (m, 3H), 4.14 (t,  $J = 7.8$  Hz, 1H), 3.06 (dd,  $J = 13.2, 8.4$  Hz, 1H), 2.99 (dd,  $J = 13.2, 7.8$  Hz, 1H), 2.27 (s, 3H).

$^{13}\text{C}$  NMR (151 MHz,  $\text{CDCl}_3$ )  $\delta$  139.4, 137.3, 137.1, 136.0, 132.5, 129.8, 129.5, 129.3, 128.7, 127.8, 127.3, 126.6, 126.5, 126.4, 126.0, 125.9, 52.2, 38.9, 20.9.

ACPI-MS calcd for  $\text{C}_{21}\text{H}_{19}\text{S}^+$   $[\text{M}+\text{H}]^+$  303.1202, found 303.1202.

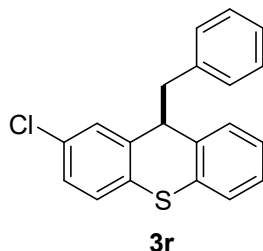

**9-Benzyl-2-chloro-9H-thioxanthene (3r):** Prepared following general procedure and the reaction mixture was purified by flash column chromatography with petroleum ether and ethylacetate (PE/EA = 100:1) to afford the product **3r** (63.9 mg, 66% yield).

White solid; m.p.: 113.6~114.9 °C.

<sup>1</sup>H NMR (600 MHz, CDCl<sub>3</sub>) δ 7.42 (d, *J* = 7.8 Hz, 1H), 7.35 (d, *J* = 8.4 Hz, 1H), 7.21–7.16 (m, 5H), 7.10 (t, *J* = 7.8 Hz, 1H), 6.96 (s, 1H), 6.92 (d, *J* = 7.8 Hz, 1H), 6.84–6.83 (m, 2H), 4.13 (t, *J* = 7.8 Hz, 1H), 3.04–2.95 (m, 2H).

<sup>13</sup>C NMR (151 MHz, CDCl<sub>3</sub>) δ 139.0, 138.7, 136.4, 131.9, 131.7, 130.8, 129.4, 129.3, 129.0, 128.0, 127.7, 126.7, 126.6, 126.5, 126.4, 126.2, 52.0, 38.7.

ACPI-MS calcd for C<sub>20</sub>H<sub>14</sub>SCl<sup>+</sup> [M-H]<sup>+</sup> 323.0499, found 323.0495.

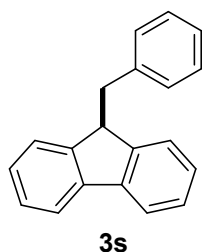

**9-Benzyl-9H-fluorene (3s):** Prepared following general procedure and the reaction mixture was purified by flash column chromatography with petroleum ether (PE) to afford the product **3s** (36.1 mg, 47% yield).

White solid; m.p.: 125.3~126.6 °C.

<sup>1</sup>H NMR (600 MHz, CDCl<sub>3</sub>) δ 7.74 (d, *J* = 7.8 Hz, 2H), 7.34 (t, *J* = 7.2 Hz, 2H), 7.31 (t, *J* = 7.8 Hz, 2H), 7.23 (d, *J* = 7.8 Hz, 3H), 7.21 (d, *J* = 7.2 Hz, 2H), 7.17 (d, *J* = 7.8 Hz, 2H), 4.23 (t, *J* = 7.8 Hz, 1H), 3.11 (d, *J* = 7.8 Hz, 2H).

<sup>13</sup>C NMR (151 MHz, CDCl<sub>3</sub>) δ 146.8, 139.8, 138.8, 128.5, 127.3, 126.1, 125.6, 125.3, 123.8, 118.8, 47.7, 39.1.

ACPI-MS calcd for C<sub>20</sub>H<sub>17</sub><sup>+</sup> [M+H]<sup>+</sup> 257.1325, found 257.1325.

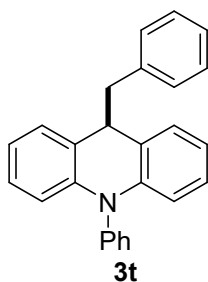

**9-Benzyl-10-phenyl-9,10-dihydroacridine (3t):** Prepared following general procedure and the reaction mixture was purified by flash column chromatography with petroleum ether and ethylacetate (PE/EA = 100:1) to afford the product **3t** (58.3 mg, 56% yield).

White solid; m.p.: 136.9~138.1 °C.

<sup>1</sup>H NMR (600 MHz, CDCl<sub>3</sub>) δ 7.54 (t, *J* = 7.8 Hz, 2H), 7.45 (t, *J* = 7.8 Hz, 1H), 7.18 (t, *J* = 7.2 Hz, 1H), 7.10 (t, *J* = 7.2 Hz, 2H), 7.07 (d, *J* = 7.2 Hz, 2H), 6.97–6.93 (m, 4H), 6.85 (t, *J* = 7.2 Hz, 2H), 6.59 (d, *J* = 7.8 Hz, 2H), 6.12 (d, *J* = 8.4 Hz, 2H), 4.41 (t, *J* = 6.0 Hz, 1H), 2.99 (d, *J* = 6.0 Hz, 2H).

<sup>13</sup>C NMR (151 MHz, CDCl<sub>3</sub>) δ 142.1, 140.7, 138.5, 131.1, 130.6, 130.0, 128.6, 128.0, 127.6, 126.6, 125.9, 123.6, 120.3, 113.6, 47.8, 44.7.

ACPI-MS calcd for C<sub>26</sub>H<sub>22</sub>N<sup>+</sup> [M+H]<sup>+</sup> 348.1747, found 348.1748.

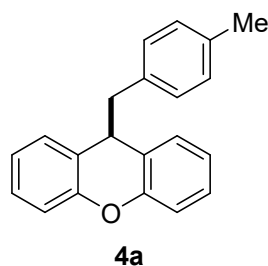

**9-(4-Methylbenzyl)-9H-xanthene (4a):** Prepared following general procedure and the reaction mixture was purified by flash column chromatography with petroleum ether (PE) to afford the product **4a** (71.1 mg, 83% yield).

White solid; m.p.: 105.2~107.5 °C.

<sup>1</sup>H NMR (600 MHz, CDCl<sub>3</sub>) δ 7.21–7.19 (m, 2H), 7.04 (d, *J* = 7.8 Hz, 2H), 7.01–6.95 (m, 6H), 6.64 (d, *J* = 7.8 Hz, 2H), 4.17 (t, *J* = 7.2 Hz, 1H), 2.92 (d, *J* = 6.6 Hz, 2H), 2.30 (s, 3H).

<sup>13</sup>C NMR (151 MHz, CDCl<sub>3</sub>) δ 152.2, 135.7, 135.1, 129.6, 128.9, 128.6, 127.5, 124.8, 122.79, 116.2, 47.1, 41.8, 21.1.

ACPI-MS calcd for C<sub>21</sub>H<sub>19</sub>O<sup>+</sup> [M+H]<sup>+</sup> 287.1430, found 287.1433.

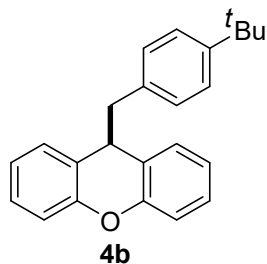

**9-(4-Butylbenzyl)-9H-xanthene (4b):** Prepared following general procedure and the reaction mixture was purified by flash column chromatography with petroleum ether (PE) to afford the product **4b** (83.4 mg, 85% yield).

White solid; m.p.: 102.6~104.2 °C.

$^1\text{H}$  NMR (600 MHz,  $\text{CDCl}_3$ )  $\delta$  7.21 (t,  $J = 7.8$  Hz, 4H), 7.07 (d,  $J = 8.4$  Hz, 2H), 6.98 (t,  $J = 7.2$  Hz, 2H), 6.93 (d,  $J = 7.2$  Hz, 2H), 6.75 (d,  $J = 7.8$  Hz, 2H), 4.15 (t,  $J = 6.6$  Hz, 1H), 2.93 (d,  $J = 6.6$  Hz, 2H), 1.31 (s, 9H).

$^{13}\text{C}$  NMR (151 MHz,  $\text{CDCl}_3$ )  $\delta$  152.2, 149.1, 135.3, 129.4, 129.0, 127.5, 125.0, 124.8, 122.7, 116.2, 47.1, 41.9, 34.4, 31.4.

ACPI-MS calcd for  $\text{C}_{24}\text{H}_{25}\text{O}^+$   $[\text{M}+\text{H}]^+$  329.1900, found 329.1902.

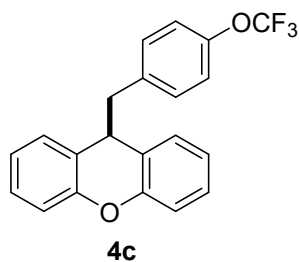

**9-(4-(Trifluoromethoxy)benzyl)-9H-xanthene (4c):** Prepared following general procedure and the reaction mixture was purified by flash column chromatography with petroleum ether (PE) to afford the product **4c** (81.2 mg, 76% yield).

White solid; m.p.: 119.3~121.6 °C.

$^1\text{H}$  NMR (600 MHz,  $\text{CDCl}_3$ )  $\delta$  7.22–7.19 (m, 2H), 7.01 (d,  $J = 7.8$  Hz, 3H), 7.00–6.97 (m, 4H), 6.96 (s, 1H), 6.67 (d,  $J = 8.4$  Hz, 2H), 4.21 (t,  $J = 6.6$  Hz, 1H), 2.96 (d,  $J = 6.6$  Hz, 2H).

$^{13}\text{C}$  NMR (151 MHz,  $\text{CDCl}_3$ )  $\delta$  152.3, 147.9, 136.8, 131.0, 128.7, 127.8, 124.1, 123.0, 120.5 (q,  $J = 256.1$  Hz) 120.3, 116.4, 46.6, 41.5.

$^{19}\text{F}$  NMR (565 MHz,  $\text{CDCl}_3$ )  $\delta$  -57.91.



ACPI-MS calcd for  $C_{21}H_{16}O_2F_3^+$   $[M+H]^+$  357.1097, found 357.1100.

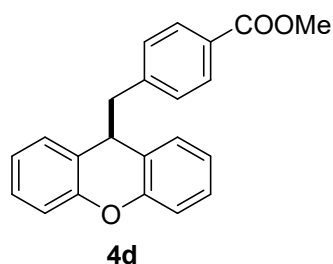

**Methyl 4-((9*H*-xanthen-9-yl)methyl)benzoate (4d):** Prepared following general procedure and the reaction mixture was purified by flash column chromatography with petroleum ether and ethylacetate (PE/EA = 100:1) to afford the product **4d** (52.7 mg, 53% yield).

White solid; m.p.: 121.8~123.5 °C.

$^1H$  NMR (600 MHz,  $CDCl_3$ )  $\delta$  7.80 (d,  $J = 8.4$  Hz, 2H), 7.22–7.19 (m, 2H), 7.01–6.99 (m, 6H), 6.74 (d,  $J = 8.4$  Hz, 2H), 4.26 (t,  $J = 6.6$  Hz, 1H), 3.89 (s, 3H), 3.02 (d,  $J = 6.0$  Hz, 2H).

$^{13}C$  NMR (151 MHz,  $CDCl_3$ )  $\delta$  167.2, 152.2, 143.5, 129.8, 129.1, 128.7, 128.2, 127.8, 124.0, 123.0, 116.3, 52.0, 47.3, 41.3.

HRMS (ESI) calcd for  $C_{22}H_{18}O_3Na^+$   $[M+Na]^+$  353.1148, found 353.1145.

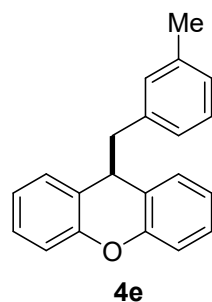

**9-(3-Methylbenzyl)-9*H*-xanthene (4e):** Prepared following general procedure and the reaction mixture was purified by flash column chromatography with petroleum ether (PE) to afford the product **4e** (67.0 mg, 78% yield).

White solid; m.p.: 114.1~113.4 °C.

$^1H$  NMR (600 MHz,  $CDCl_3$ )  $\delta$  7.21 (t,  $J = 8.4$  Hz, 2H), 7.07–7.04 (m, 3H), 7.00 (t,  $J = 7.2$  Hz, 3H), 6.97 (d,  $J = 7.2$  Hz, 2H), 6.56 (d,  $J = 6.0$  Hz, 2H), 4.19 (t,  $J = 6.6$  Hz, 1H), 2.93 (d,  $J = 6.6$  Hz, 2H), 2.23 (s, 3H).

$^{13}\text{C}$  NMR (151 MHz,  $\text{CDCl}_3$ )  $\delta$  152.3, 138.1, 137.3, 130.6, 128.9, 127.7, 127.6, 126.9, 126.8, 124.8, 122.8, 116.2, 47.5, 41.8, 21.2.

ACPI-MS calcd for  $\text{C}_{21}\text{H}_{17}\text{O}^+$   $[\text{M}-\text{H}]^+$  285.1274, found 285.1275.

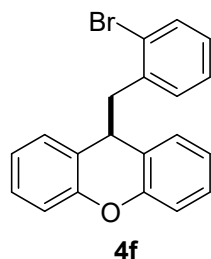

**9-(2-Bromobenzyl)-9H-xanthene (4f):** Prepared following general procedure and the reaction mixture was purified by flash column chromatography with petroleum ether (PE) to afford the product **4f** (67.1 mg, 64% yield).

White solid; m.p.: 134.6~136.1 °C.

$^1\text{H}$  NMR (600 MHz,  $\text{CDCl}_3$ )  $\delta$  7.21–7.18 (m, 2H), 7.17 (d,  $J = 6.6$  Hz, 1H), 7.14 (t,  $J = 6.6$  Hz, 2H), 7.03 (d,  $J = 7.8$  Hz, 2H), 7.00 (d,  $J = 7.2$  Hz, 1H), 6.98–6.96 (m, 2H), 6.73 (d,  $J = 6.6$  Hz, 2H), 4.20 (t,  $J = 6.6$  Hz, 1H), 2.96 (d,  $J = 6.6$  Hz, 2H).

$^{13}\text{C}$  NMR (151 MHz,  $\text{CDCl}_3$ )  $\delta$  152.3, 138.2, 129.8, 128.9, 127.8, 127.6, 126.2, 124.6, 122.82, 116.2, 47.5, 41.7.

ACPI-MS calcd for  $\text{C}_{20}\text{H}_{16}\text{OBr}^+$   $[\text{M}+\text{H}]^+$  363.0379, found 363.0378.

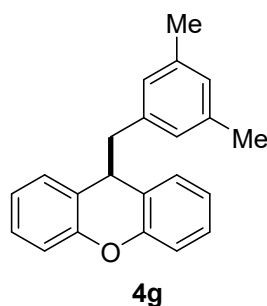

**9-(3,5-Dimethylbenzyl)-9H-xanthene (4g):** Prepared following general procedure and the reaction mixture was purified by flash column chromatography with petroleum ether (PE) to afford the product **4g** (71.1 mg, 79% yield).

White solid; m.p.: 116.2~118.1 °C.

$^1\text{H}$  NMR (600 MHz,  $\text{CDCl}_3$ )  $\delta$  7.21 (t,  $J = 7.2$  Hz, 2H), 7.06 (d,  $J = 8.4$  Hz, 2H), 7.00 (t,  $J = 7.8$  Hz, 2H), 6.96 (d,  $J = 6.0$  Hz, 2H), 6.83 (s, 1H), 6.38 (s, 2H), 4.16 (t,  $J = 6.6$  Hz, 1H), 2.88 (d,  $J = 6.6$  Hz, 2H), 2.20 (s, 6H).

$^{13}\text{C}$  NMR (151 MHz,  $\text{CDCl}_3$ )  $\delta$  152.3, 138.1, 137.2, 129.0, 127.7, 127.7, 127.5, 124.9, 122.7, 116.1, 47.5, 41.8, 21.1.

ACPI-MS calcd for  $\text{C}_{22}\text{H}_{21}\text{O}^+$   $[\text{M}+\text{H}]^+$  301.1587, found 301.1589.

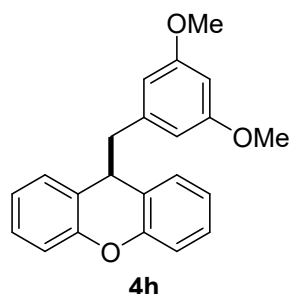

**9-(3,5-Dimethoxybenzyl)-9H-xanthene (4h):** Prepared following general procedure and the reaction mixture was purified by flash column chromatography with petroleum ether and ethylacetate (PE/EA = 100:1) to afford the product **4h** (82.7 mg, 83% yield).

White solid; m.p.: 134.6~136.1 °C.

$^1\text{H}$  NMR (600 MHz,  $\text{CDCl}_3$ )  $\delta$  7.21 (t,  $J = 7.2$  Hz, 2H), 7.05–7.01 (m, 6H), 6.30 (s, 1H), 5.87 (s, 1H), 5.87 (s, 1H), 4.22 (t,  $J = 6.6$  Hz, 1H), 3.61 (s, 6H), 2.91 (d,  $J = 6.6$  Hz, 2H).

$^{13}\text{C}$  NMR (151 MHz,  $\text{CDCl}_3$ )  $\delta$  160.1, 152.3, 140.3, 128.9, 127.6, 124.5, 122.8, 116.2, 107.5, 99.0, 55.1, 47.7, 41.5.

ACPI-MS calcd for  $\text{C}_{22}\text{H}_{21}\text{O}_3^+$   $[\text{M}+\text{H}]^+$  333.1485, found 333.1484.

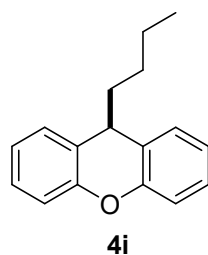

**9-Butyl-9H-xanthene (4i):** Prepared following general procedure and the reaction mixture was purified by flash column chromatography with petroleum ether (PE) to afford the product **4i** (44.5 mg, 62% yield).

White solid; m.p.: 103.3~104.6 °C.

$^1\text{H}$  NMR (600 MHz,  $\text{CDCl}_3$ )  $\delta$  7.23–7.20 (m, 4H), 7.09–7.05 (m, 4H), 3.98 (t,  $J = 6.0$  Hz, 1H), 1.74–1.70 (m, 2H), 1.23–1.19 (m, 2H), 1.18–1.14 (m, 2H), 0.80 (t,  $J = 7.2$  Hz, 3H).

$^{13}\text{C}$  NMR (151 MHz,  $\text{CDCl}_3$ )  $\delta$  152.3, 128.6, 127.4, 125.8, 123.0, 116.3, 40.5, 39.1, 27.6, 22.7, 13.9.

ACPI-MS calcd for  $\text{C}_{17}\text{H}_{19}\text{O}^+$   $[\text{M}+\text{H}]^+$  239.1430, found 239.1432.

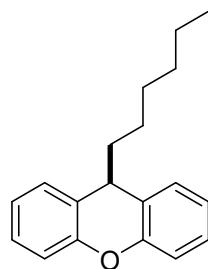

**4j**

**9-Hexyl-9H-xanthene (4j):** Prepared following general procedure and the reaction mixture was purified by flash column chromatography with petroleum ether (PE) to afford the product **4j** (51.9 mg, 65% yield).

White solid; m.p.: 91.3~92.6 °C.

$^1\text{H}$  NMR (600 MHz,  $\text{CDCl}_3$ )  $\delta$  7.21 (t,  $J = 8.4$  Hz, 4H), 7.09–7.05 (m, 4H), 3.97 (t,  $J = 6.0$  Hz, 1H), 1.72–1.69 (m, 2H), 1.26–1.17 (m, 8H), 0.79 (t,  $J = 7.2$  Hz, 3H).

$^{13}\text{C}$  NMR (151 MHz,  $\text{CDCl}_3$ )  $\delta$  152.3, 128.6, 127.4, 125.8, 123.0, 116.3, 40.7, 39.1, 31.8, 25.2, 22.5, 14.0.

ACPI-MS calcd for  $\text{C}_{19}\text{H}_{23}\text{O}^+$   $[\text{M}+\text{H}]^+$  267.1743, found 267.1748.

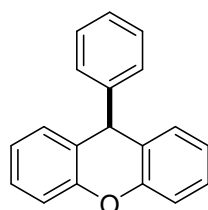

**4k**

**9-Phenyl-9H-xanthene (4k):** Prepared following general procedure and the reaction mixture was purified by flash column chromatography with petroleum ether (PE) to afford the product **4k** (67.4 mg, 87% yield).

White solid; m.p.: 138.9~140.7 °C.

$^1\text{H}$  NMR (600 MHz,  $\text{CDCl}_3$ )  $\delta$  7.27 (t,  $J = 7.2$  Hz, 2H), 7.22–7.17 (m, 5H), 7.13 (d,  $J = 7.8$  Hz, 2H), 7.06 (d,  $J = 7.2$  Hz, 2H), 6.98 (t,  $J = 7.2$  Hz, 2H), 5.26 (s, 1H).

$^{13}\text{C}$  NMR (151 MHz,  $\text{CDCl}_3$ )  $\delta$  151.0, 146.5, 129.7, 128.7, 128.4, 127.9, 126.6, 124.4, 123.2, 116.5, 44.4.

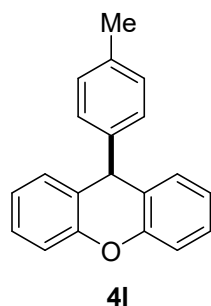

**9-(*p*-Tolyl)-9*H*-xanthene (4l)<sup>4</sup>:** Prepared following general procedure and the reaction mixture was purified by flash column chromatography with petroleum ether (PE) to afford the product **4l** (67.5 mg, 83% yield).

White solid; m.p.: 121.7~122.5 °C.

$^1\text{H}$  NMR (600 MHz,  $\text{CDCl}_3$ )  $\delta$  7.21 (t,  $J = 7.2$  Hz, 2H), 7.14 (d,  $J = 7.8$  Hz, 2H), 7.10 (t,  $J = 9.0$  Hz, 4H), 7.07 (d,  $J = 7.8$  Hz, 2H), 6.98 (t,  $J = 7.2$  Hz, 2H), 5.23 (s, 1H), 2.30 (s, 3H).

$^{13}\text{C}$  NMR (151 MHz,  $\text{CDCl}_3$ )  $\delta$  151.0, 143.6, 136.2, 129.7, 129.4, 128.2, 127.8, 124.6, 123.2, 116.5, 44.0, 21.0.

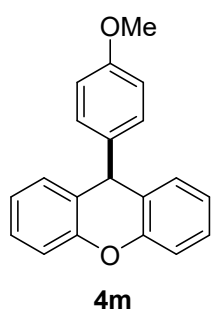

**9-(4-Methoxyphenyl)-9*H*-xanthene (4m)<sup>1b</sup>:** Prepared following general procedure and the reaction mixture was purified by flash column chromatography with petroleum ether and ethylacetate (PE/EA = 100:1) to afford the product **4m** (73.0 mg, 84% yield).

White solid; m.p.: 121.7~122.5 °C.

$^1\text{H}$  NMR (600 MHz,  $\text{CDCl}_3$ )  $\delta$  7.22 (t,  $J = 7.8$  Hz, 2H), 7.15 – 7.13 (m, 4H), 7.07 (d,  $J = 7.8$  Hz, 2H), 7.00 (t,  $J = 7.2$  Hz, 2H), 6.83 (d,  $J = 9.0$  Hz, 2H), 5.23 (s, 1H), 3.77 (s, 3H).

$^{13}\text{C}$  NMR (151 MHz,  $\text{CDCl}_3$ )  $\delta$  158.3, 151.0, 138.8, 129.6, 129.4, 127.8, 124.7, 123.2, 116.5, 114.1, 55.2, 43.5.

HRMS (ESI) calcd for  $\text{C}_{20}\text{H}_{17}\text{O}_2^+([\text{M}+\text{H}]^+)$ : 289.1223, found: 289.1220.

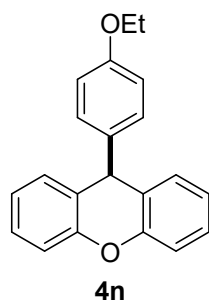

**9-(4-Ethoxyphenyl)-9H-xanthene (4n)<sup>1b</sup>**: Prepared following general procedure and the reaction mixture was purified by flash column chromatography with petroleum ether and ethylacetate (PE/EA = 100:1) to afford the product **4n** (79.1 mg, 87% yield). White solid; m.p.: 134.6~135.9 °C.

$^1\text{H}$  NMR (600 MHz,  $\text{CDCl}_3$ )  $\delta$  7.21 (t,  $J = 7.8$  Hz, 2H), 7.14 (d,  $J = 7.8$  Hz, 2H), 7.12 (d,  $J = 9.0$  Hz, 2H), 7.07 (d,  $J = 7.2$  Hz, 2H), 6.99 (t,  $J = 7.2$  Hz, 2H), 6.82 (d,  $J = 8.4$  Hz, 2H), 5.22 (s, 1H), 3.99 (q,  $J = 13.8, 7.2$  Hz, 2H), 1.39 (t,  $J = 7.2$  Hz, 3H).

$^{13}\text{C}$  NMR (151 MHz,  $\text{CDCl}_3$ )  $\delta$  157.7, 151.0, 138.6, 129.7, 129.4, 127.7, 124.8, 123.1, 116.5, 114.6, 63.3, 43.5, 14.8.

HRMS (ESI) calcd. for  $\text{C}_{21}\text{H}_{18}\text{O}_2 \text{Na}^+([\text{M}+\text{Na}]^+)$ : 325.1199, found: 325.1202.

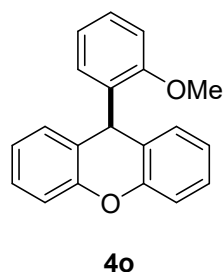

**9-(2-Methoxyphenyl)-9H-xanthene (4o)<sup>5</sup>**: Prepared following general procedure and the reaction mixture was purified by flash column chromatography with petroleum ether and ethylacetate (PE/EA = 100:1) to afford the product **4o** (58.3 mg, 67% yield).

White solid; m.p.: 136.1~128.3 °C.

$^1\text{H}$  NMR (600 MHz,  $\text{CDCl}_3$ )  $\delta$  7.1 (t,  $J = 7.8$  Hz, 2H), 7.15 (d,  $J = 7.2$  Hz, 1H), 7.12–7.10 (m, 4H) 6.95 (t,  $J = 7.8$  Hz, 3H), 6.90 (d,  $J = 8.4$  Hz, 1H), 6.83 (t,  $J = 7.8$  Hz, 1H), 5.82 (s, 1H), 3.86 (s, 3H).

$^{13}\text{C}$  NMR (151 MHz,  $\text{CDCl}_3$ )  $\delta$  156.2, 151.5, 135.3, 130.3, 129.5, 127.7, 127.5, 124.8, 123.0, 121.1, 116.2, 111.0, 55.6, 36.9.

HRMS Calcd for  $\text{C}_{20}\text{H}_{16}\text{O}_2^+$   $[\text{M}]^+$ , 288.1150. Found 288.1159.

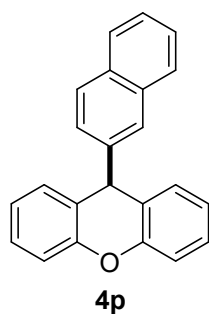

**9-(Naphthalen-2-yl)-9H-xanthene (4p):** Prepared following general procedure and the reaction mixture was purified by flash column chromatography with petroleum ether (PE) to afford the product **4p** (59.2 mg, 64% yield).

White solid; m.p.: 142.9~144.2 °C.

$^1\text{H}$  NMR (600 MHz,  $\text{CDCl}_3$ )  $\delta$  7.83 (d,  $J = 7.8$  Hz, 1H), 7.77 (d,  $J = 7.8$  Hz, 1H), 7.7 (s, 1H), 7.72 (d,  $J = 8.4$  Hz, 1H), 7.48 (t,  $J = 7.2$  Hz, 1H), 7.44 (t,  $J = 6.6$  Hz, 1H), 7.24 (d,  $J = 8.4$  Hz, 1H), 7.22 (t,  $J = 6.6$  Hz, 2H), 7.16 (d,  $J = 7.8$  Hz, 2H), 7.06 (d,  $J = 7.2$  Hz, 2H), 6.95 (t,  $J = 6.6$  Hz, 2H), 5.43 (s, 1H).

$^{13}\text{C}$  NMR (151 MHz,  $\text{CDCl}_3$ )  $\delta$  151.0, 143.5, 133.3, 132.3, 129.9, 128.9, 128.0, 127.8, 127.7, 126.8, 126.7, 126.2, 125.8, 124.0, 123.2, 116.6, 44.5.

ACPI-MS calcd for  $\text{C}_{23}\text{H}_{17}\text{O}^+$   $[\text{M}+\text{H}]^+$  309.1274, found 309.1271.

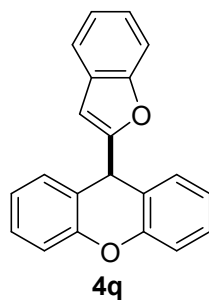

**9-(Benzofuran-2-yl)-9H-xanthene (4q)<sup>1b</sup>**: Prepared following general procedure and the reaction mixture was purified by flash column chromatography with petroleum ether and ethylacetate (PE/EA = 100:1) to afford the product **4q** (51.6 mg, 58% yield). White solid; m.p.: 142.9~144.2 °C.

<sup>1</sup>H NMR (600 MHz, CDCl<sub>3</sub>) δ 7.45 (d, *J* = 7.8 Hz, 1H), 7.40 (d, *J* = 7.8 Hz, 1H), 7.35 (d, *J* = 7.8 Hz, 2H), 7.30 (t, *J* = 7.2 Hz, 2H), 7.21 (t, *J* = 8.4 Hz, 1H), 7.19 (s, 1H), 7.17 (t, *J* = 3.6 Hz, 2H), 7.09 (t, *J* = 7.8 Hz, 2H), 6.29 (s, 1H), 5.52 (s, 1H).

<sup>13</sup>C NMR (151 MHz, CDCl<sub>3</sub>) δ 159.8, 155.1, 151.5, 129.6, 128.6, 128.3, 123.8, 123.3, 122.6, 120.7, 120.7, 116.8, 111.2, 103.5, 38.5.

HRMS (EI) calcd. for C<sub>21</sub>H<sub>14</sub>O<sub>2</sub><sup>+</sup>(M<sup>+</sup>): 298.0988, found: 298.0984.

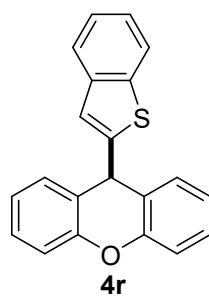

**9-(Benzo[*b*]thiophen-2-yl)-9H-xanthene (4r)**: Prepared following general procedure and the reaction mixture was purified by flash column chromatography with petroleum ether and ethylacetate (PE/EA = 100:1) to afford the product **4r** (67.8 mg, 72% yield).

White solid; m.p.: 137.5 ~139.3°C.

<sup>1</sup>H NMR (600 MHz, CDCl<sub>3</sub>) δ 7.85 (d, *J* = 7.8 Hz, 1H), 7.56 (d, *J* = 8.4 Hz, 1H), 7.36 (s, 1H), 7.28 (t, *J* = 7.8 Hz, 1H), 7.23 (t, *J* = 7.2 Hz, 2H), 7.21 (d, *J* = 5.4 Hz, 2H), 7.19 (s, 1H), 7.04 (d, *J* = 7.2 Hz, 2H), 6.93 (t, *J* = 6.6 Hz, 2H), 5.76 (s, 1H).

<sup>13</sup>C NMR (151 MHz, CDCl<sub>3</sub>) δ 151.0, 141.2, 138.9, 137.1, 129.1, 128.1, 124.7, 124.2, 124.0, 123.2, 122.9, 122.8, 122.7, 116.5, 38.6.

ACPI-MS calcd for C<sub>21</sub>H<sub>15</sub>OS<sup>+</sup> [M+H]<sup>+</sup> 315.0838, found 315.0837.



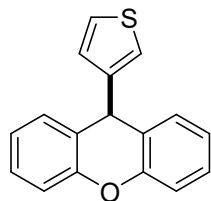

**4s**

**9-(Thiophen-3-yl)-9H-xanthene (4s):** Prepared following general procedure and the reaction mixture was purified by flash column chromatography with petroleum ether (PE) to afford the product **4s** (54.7 mg, 69% yield).

White solid; m.p.: 126.6 ~127.8°C.

$^1\text{H}$  NMR (600 MHz,  $\text{CDCl}_3$ )  $\delta$  7.27–7.23 (m, 4H), 7.14 (d,  $J = 8.4$  Hz, 3H), 7.06 (t,  $J = 7.8$  Hz, 2H), 6.88 (dd,  $J = 4.8, 3.0$  Hz, 1H), 6.80 (d,  $J = 3.6$  Hz, 1H), 5.56 (s, 1H).

$^{13}\text{C}$  NMR (151 MHz,  $\text{CDCl}_3$ )  $\delta$  151.0, 150.0, 129.5, 128.3, 126.5, 124.9, 124.8, 123.9, 123.3, 116.7, 39.5.

ACPI-MS calcd for  $\text{C}_{17}\text{H}_{13}\text{OS}^+$   $[\text{M}+\text{H}]^+$  265.0682, found 265.0681.

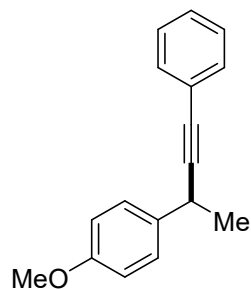

**7a**

**1-Methoxy-4-(4-phenylbut-3-yn-2-yl)benzene (7a):** Prepared following general procedure and the reaction mixture was purified by flash column chromatography with petroleum ether (PE) to afford the product **7a** (39.3 mg, 55% yield).

Colorless liquid

$^1\text{H}$  NMR (600 MHz,  $\text{CDCl}_3$ )  $\delta$  7.44–7.43 (m, 2H), 7.37 (d,  $J = 9.0$  Hz, 2H), 7.30–7.27 (m, 3H), 6.89 (d,  $J = 8.4$  Hz, 2H), 3.94 (q,  $J = 7.2$  Hz, 1H), 3.81 (s, 3H), 1.56 (d,  $J = 7.2$  Hz, 3H).

$^{13}\text{C}$  NMR (151 MHz,  $\text{CDCl}_3$ )  $\delta$  158.3, 135.5, 131.6, 128.2, 127.9, 127.7, 123.8, 113.9, 92.9, 82.2, 55.3, 31.6, 24.6.

EI calcd for  $\text{C}_{17}\text{H}_{16}\text{O}^+$   $[\text{M}]^+$  236.1196, found 236.1199.

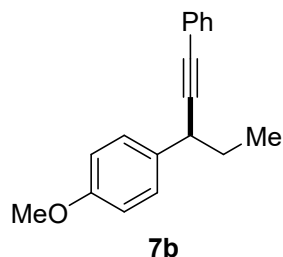

**1-Methoxy-4-(1-phenylpent-1-yn-3-yl)benzene (7b):** Prepared following general procedure and the reaction mixture was purified by flash column chromatography with petroleum ether (PE) to afford the product **7b** (32.1 mg, 43% yield).

Colorless liquid

$^1\text{H}$  NMR (600 MHz,  $\text{CDCl}_3$ )  $\delta$  7.44 (dd,  $J = 7.2, 1.8$  Hz, 2H), 7.33 (d,  $J = 8.4$  Hz, 2H), 7.33–7.28 (m, 3H), 6.88 (d,  $J = 8.4$  Hz, 2H), 3.81 (s, 3H), 3.74 (t,  $J = 7.2$  Hz, 1H), 1.86–1.81 (m, 2H), 1.04 (t,  $J = 7.2$  Hz, 3H).

$^{13}\text{C}$  NMR (151 MHz,  $\text{CDCl}_3$ )  $\delta$  158.4, 134.2, 131.6, 128.5, 128.2, 127.7, 123.9, 113.8, 91.8, 83.2, 55.3, 39.1, 31.7, 11.8.

EI calcd for  $\text{C}_{18}\text{H}_{18}\text{O}^+$   $[M]^+$  250.1352, found 250.1357.

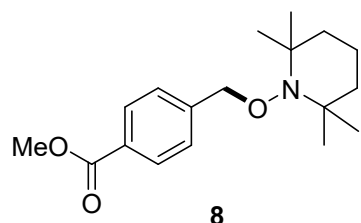

**Methyl 4-(((2,2,5,5-Tetramethylpyrrolidin-1-yl)oxy)methyl)benzoate (8)<sup>2</sup>:**

Prepared following general procedure and the reaction mixture was purified by flash column chromatography with petroleum ether and ethylacetate (PE/EA = 50:1) to afford the product **8** (75.8 mg, 62% yield).

White solid; m.p.: 116.2~118.1 °C.

$^1\text{H}$  NMR (600 MHz,  $\text{CDCl}_3$ )  $\delta$  8.01 (d,  $J = 8.4$  Hz, 2H), 7.41 (d,  $J = 8.4$  Hz, 2H), 4.88 (s, 2H), 3.91 (s, 3H), 1.53–1.49 (m, 4H), 1.36–1.24 (m, 2H), 1.22 (s, 6H), 1.16 (s, 6H).

$^{13}\text{C}$  NMR (151 MHz,  $\text{CDCl}_3$ )  $\delta$  167.0, 143.7, 129.6, 129.0, 126.9, 78.2, 60.1, 52.0, 39.7, 33.0, 20.3, 17.1.

## 8. $^1\text{H}$ , $^{13}\text{C}$ , $^{19}\text{F}$ NMR spectra of the products

NMR spectra of Potassium (4-(tert-butyl)benzyl)trifluoroborate (**2b**)

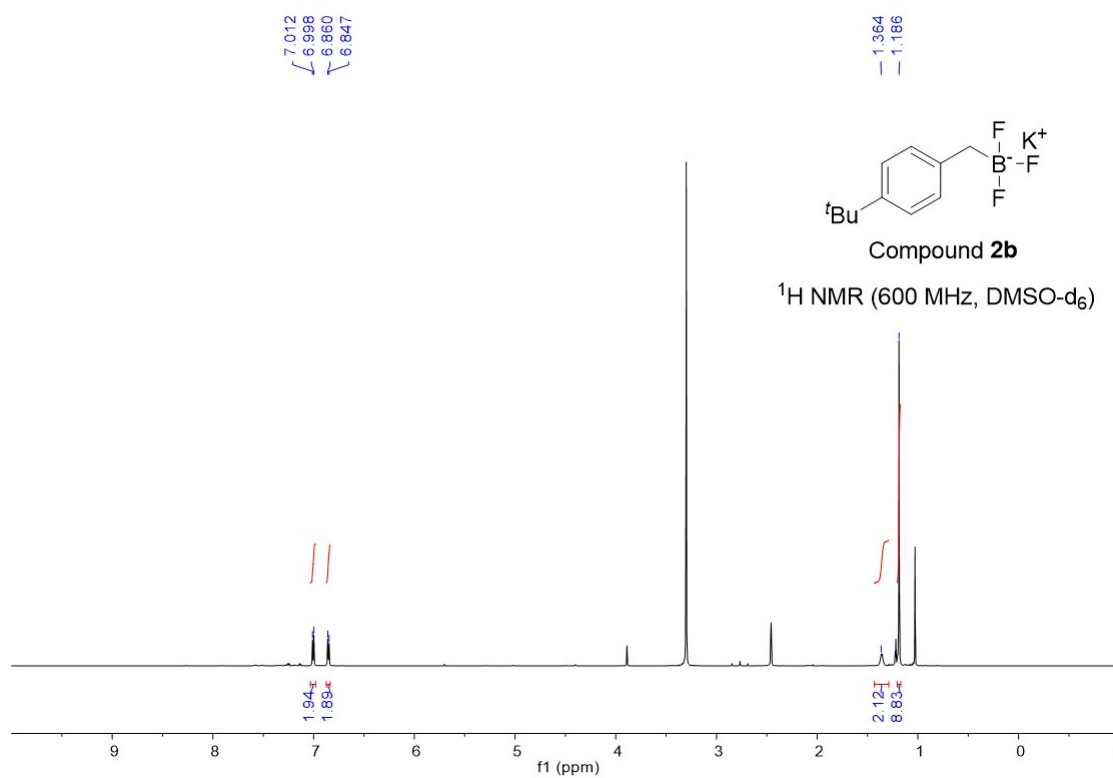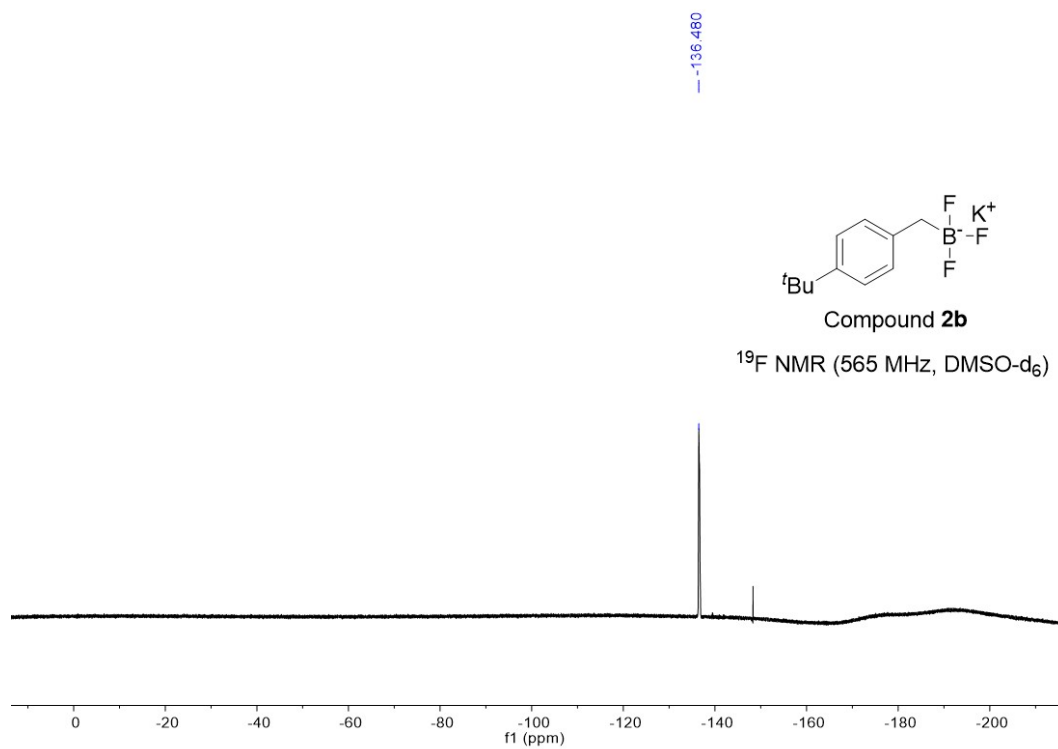

NMR spectra of Potassium (3,5-dimethylbenzyl)trifluoroborate (**2g**)

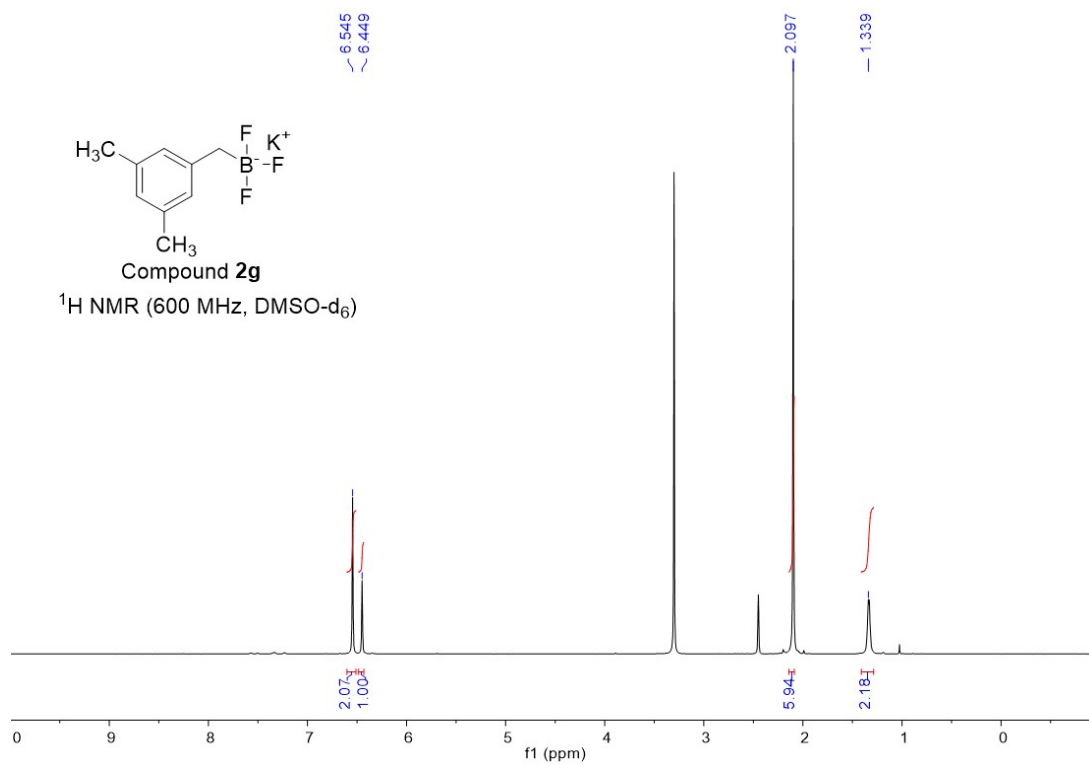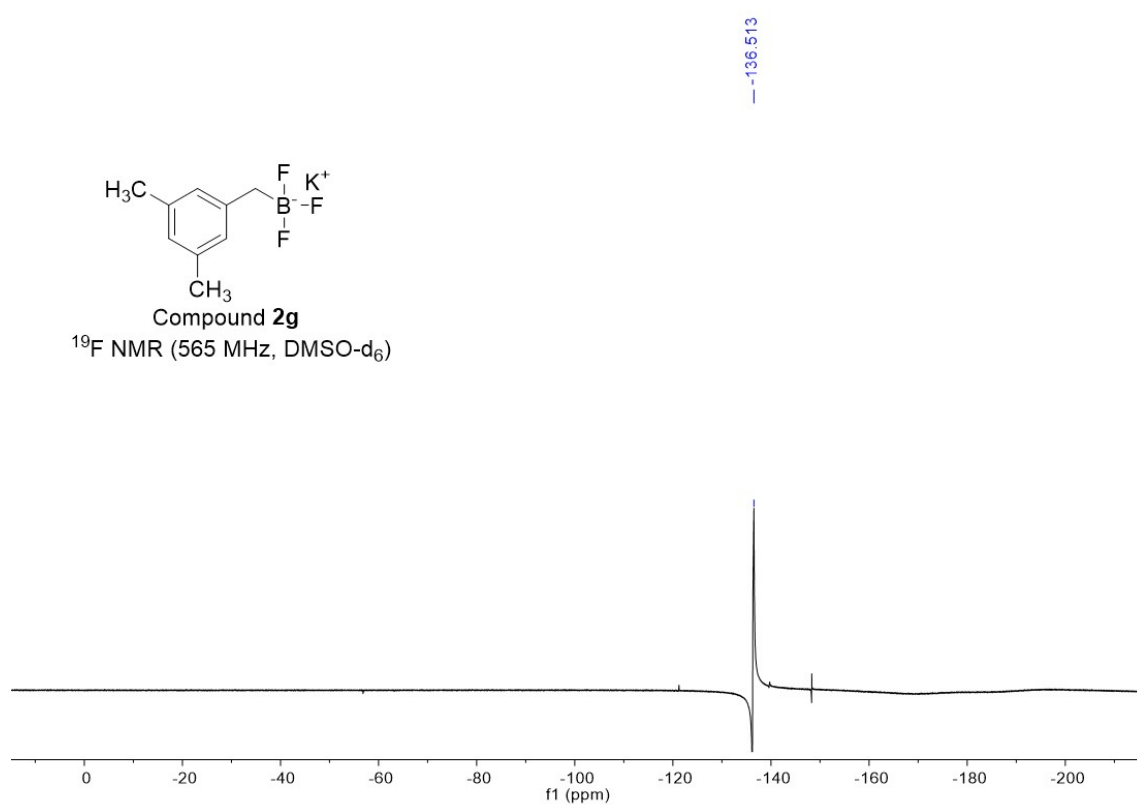

NMR spectra of 2-chloro-6-(trifluoromethyl)-9H-xanthene (**11**)

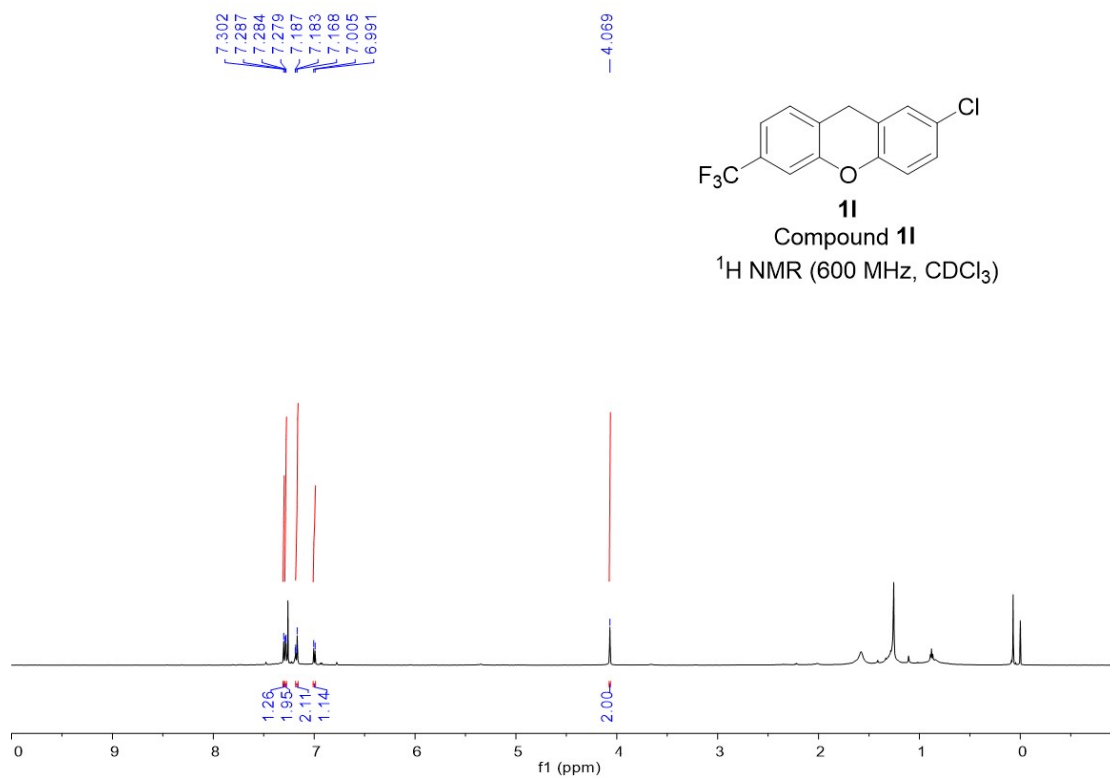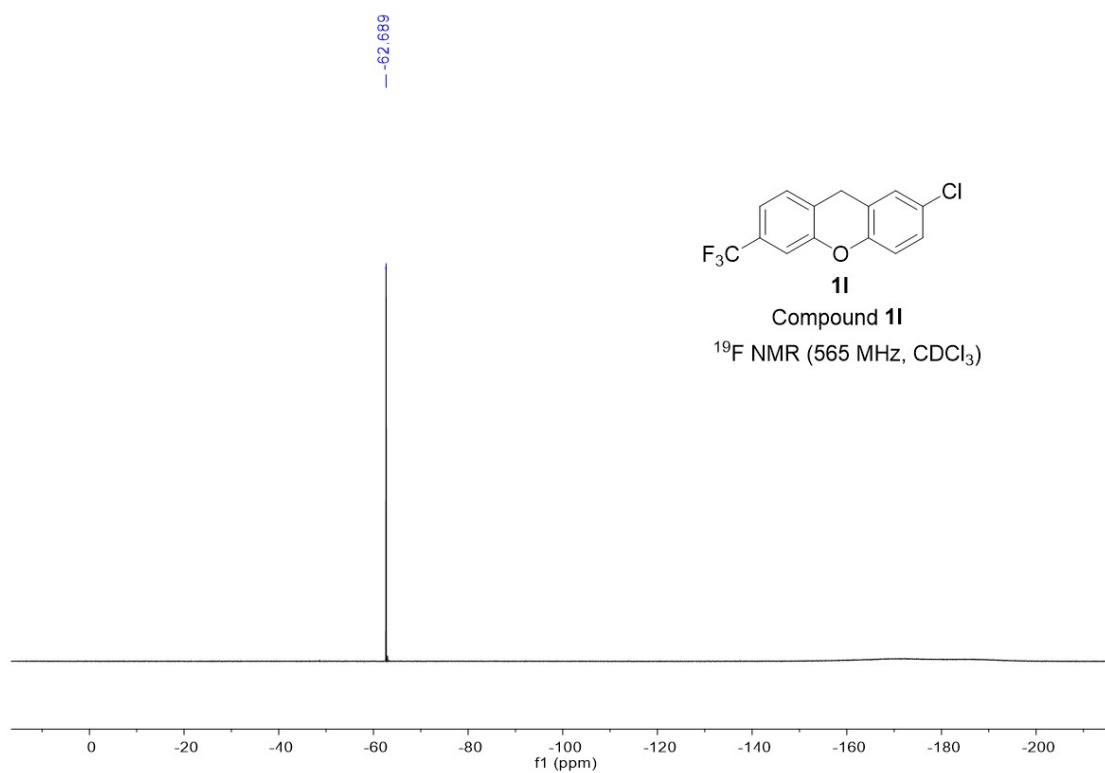

NMR spectra of 9-benzyl-9*H*-xanthene (**3a**)

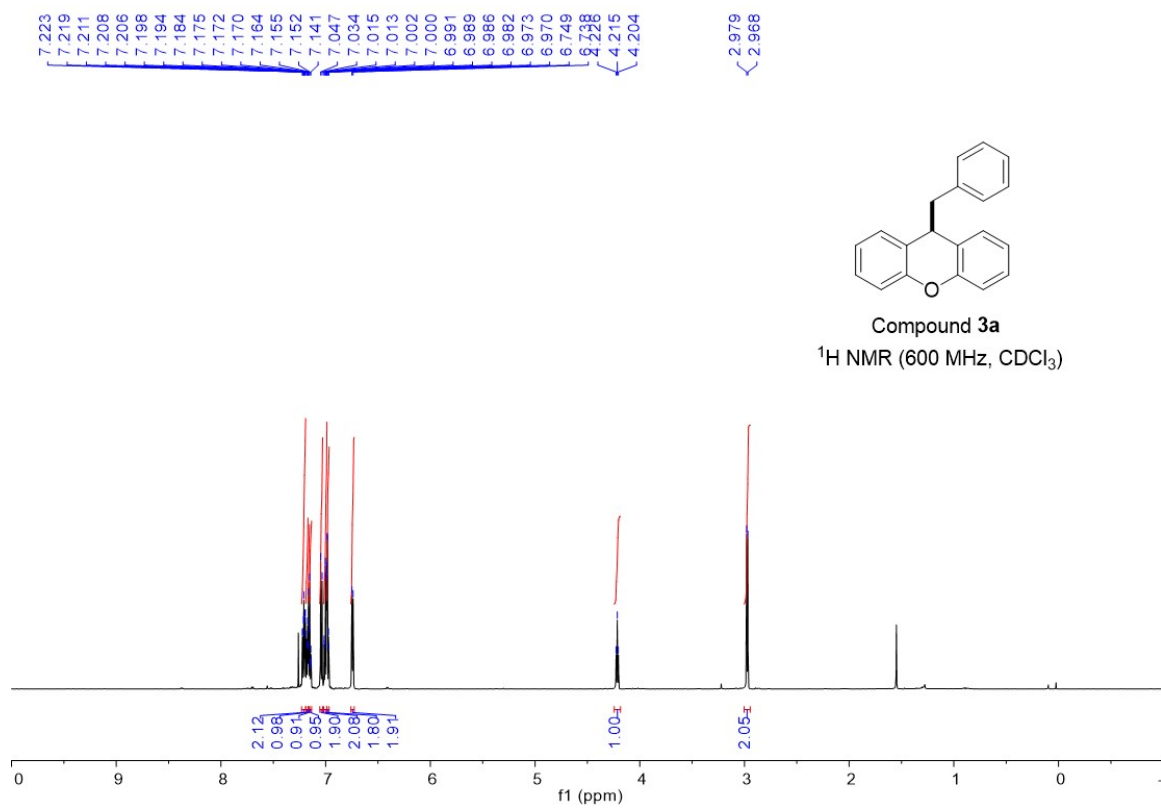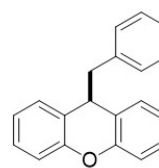

Compound 3a  
<sup>1</sup>H NMR (600 MHz, CDCl<sub>3</sub>)

152.263  
 138.136  
 129.765  
 128.847  
 127.829  
 127.599  
 126.233  
 124.630  
 122.817  
 116.216  
 47.478  
 41.714

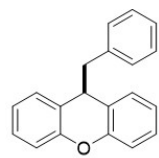

Compound 3a  
<sup>13</sup>C NMR (151 MHz, CDCl<sub>3</sub>)

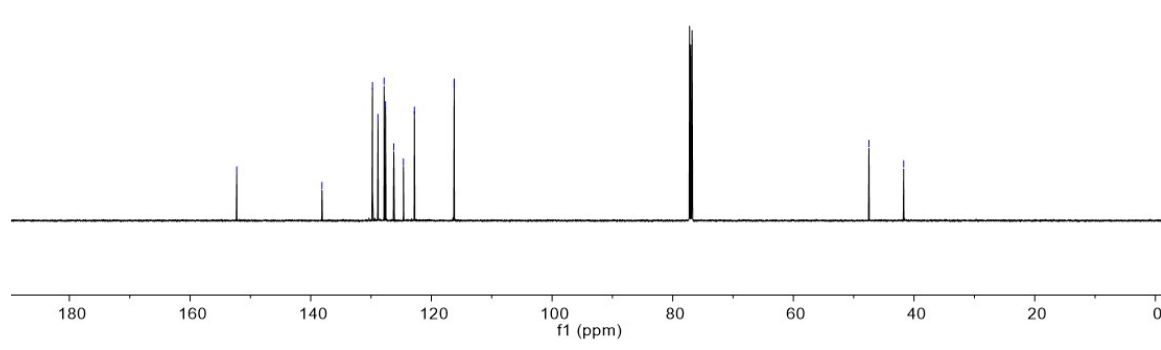

NMR spectra of 9-benzyl-4-methyl-9*H*-xanthene (**3b**)



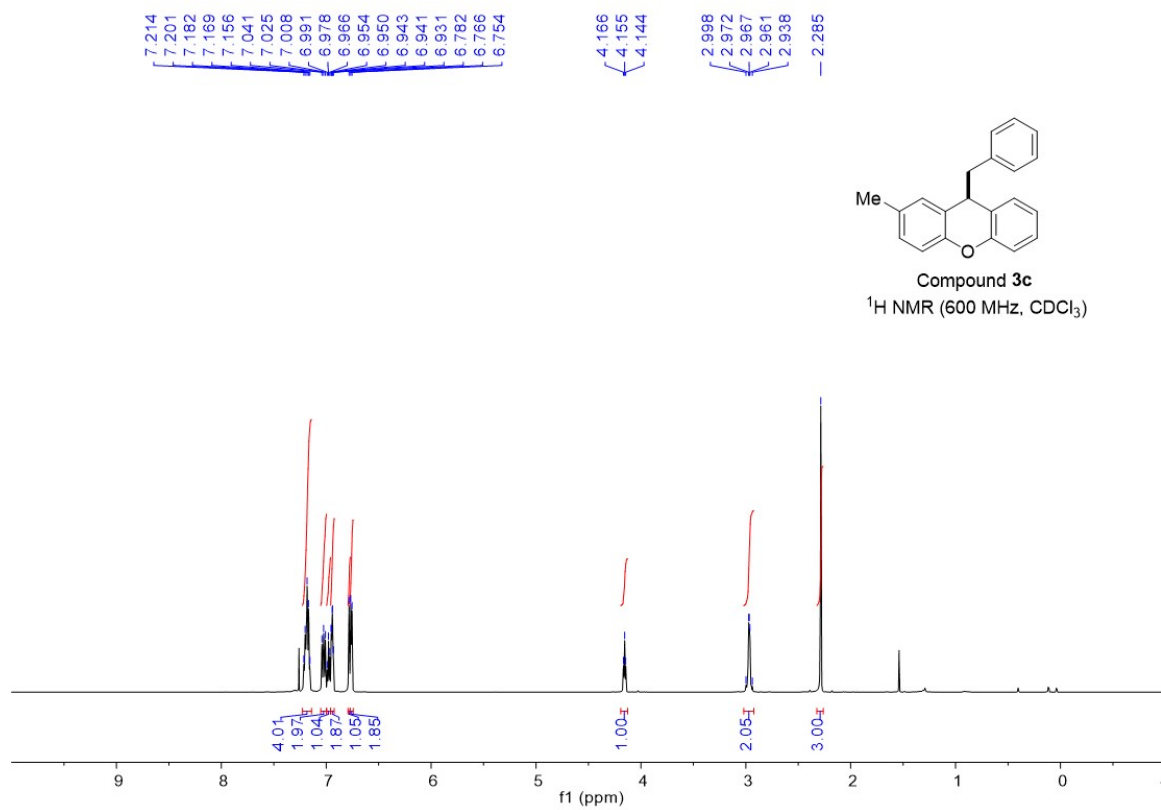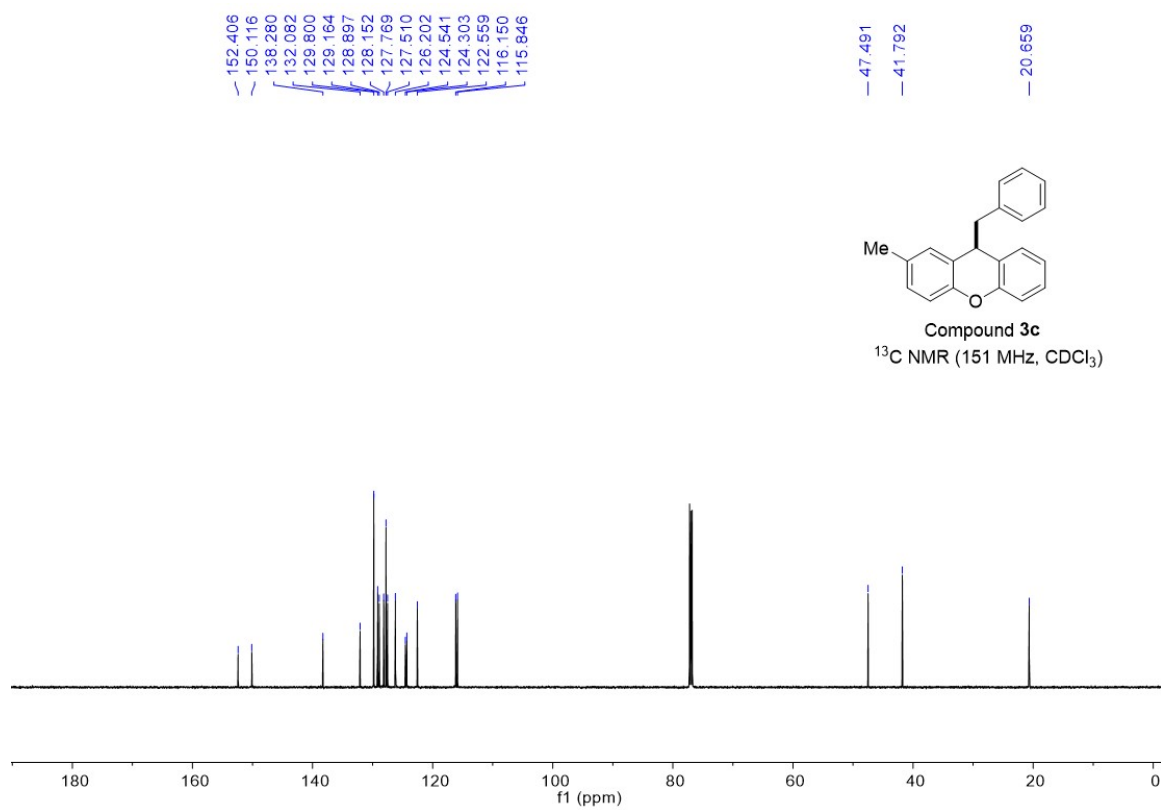

NMR spectra of 9-benzyl-2-chloro-9H-xanthene (**3d**)



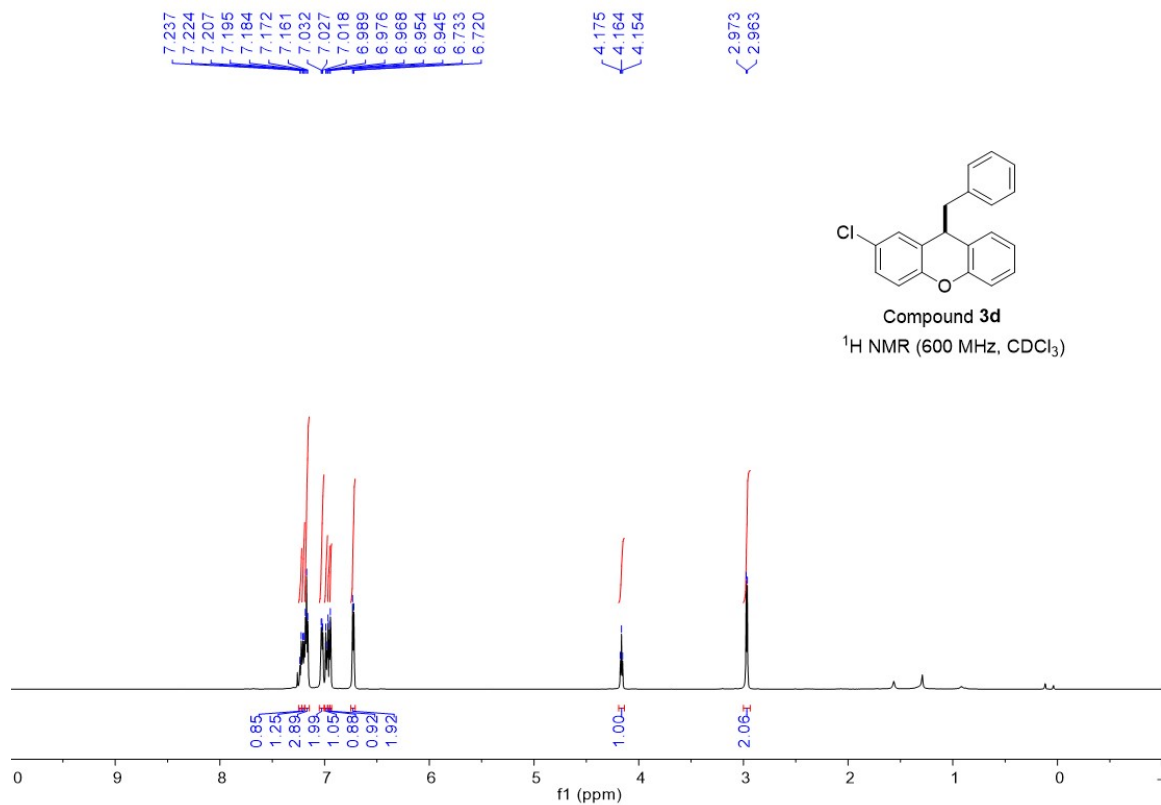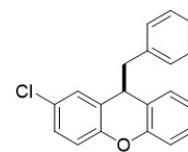

Compound **3d**  
<sup>1</sup>H NMR (600 MHz, CDCl<sub>3</sub>)

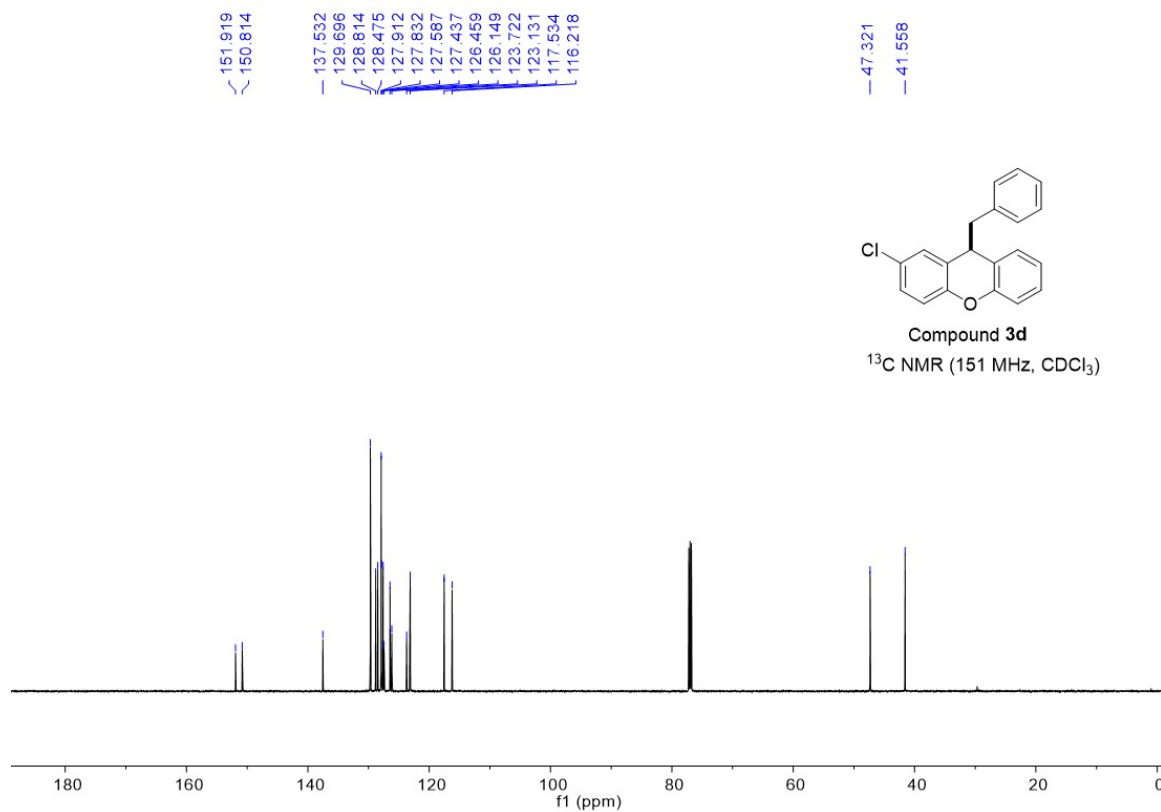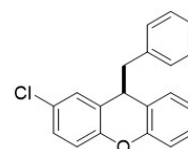

Compound **3d**  
<sup>13</sup>C NMR (151 MHz, CDCl<sub>3</sub>)

NMR spectra of 9-benzyl-2-(trifluoromethyl)-9*H*-xanthene (**3e**)

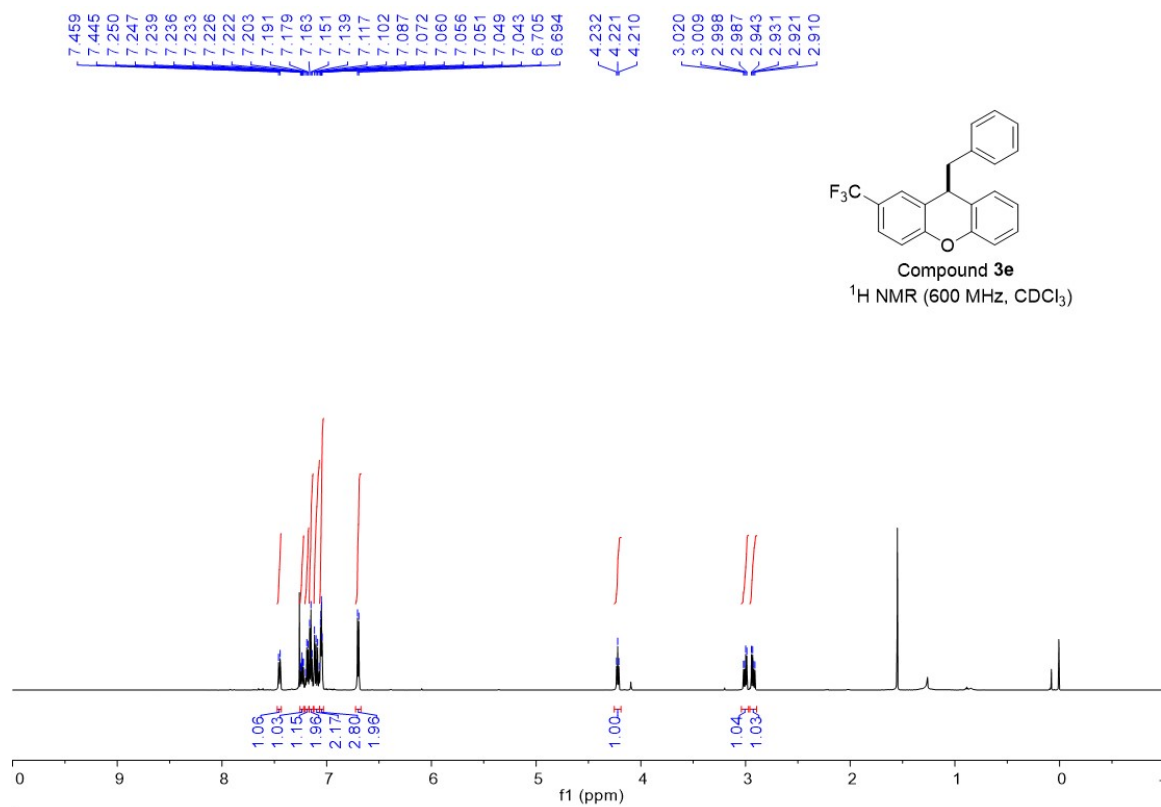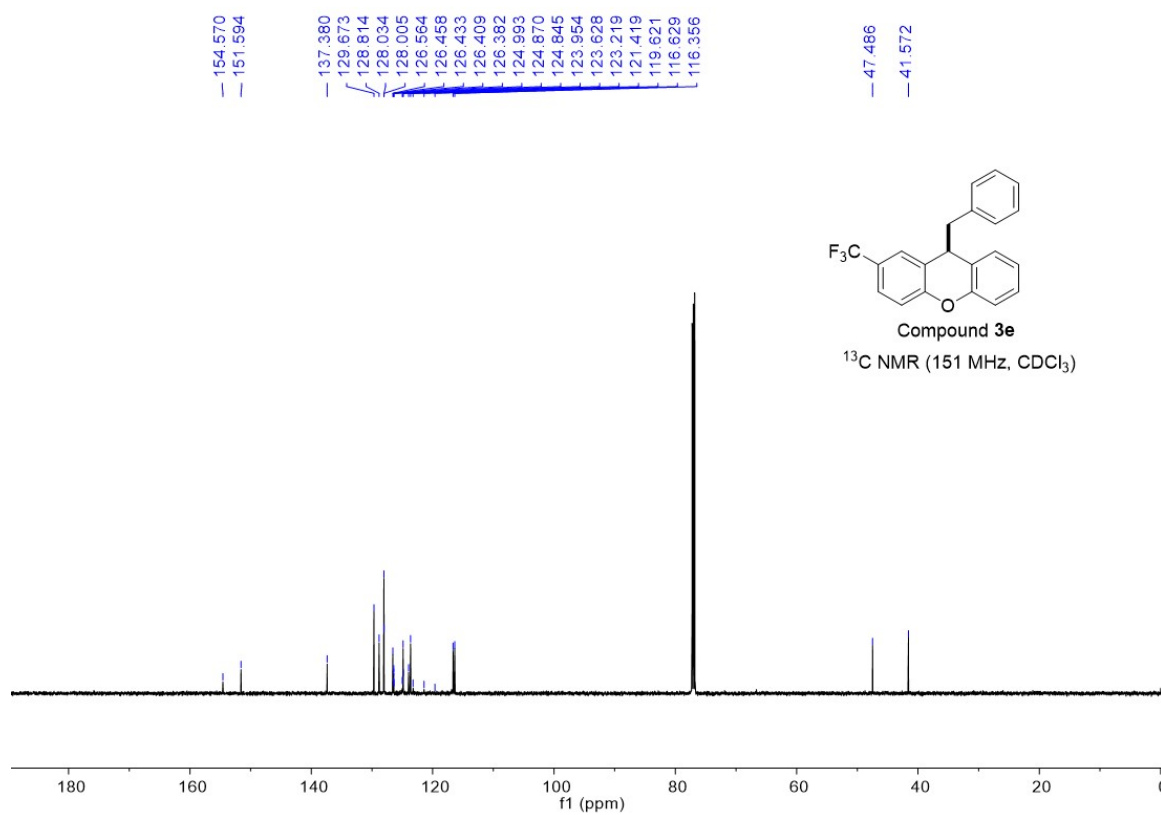

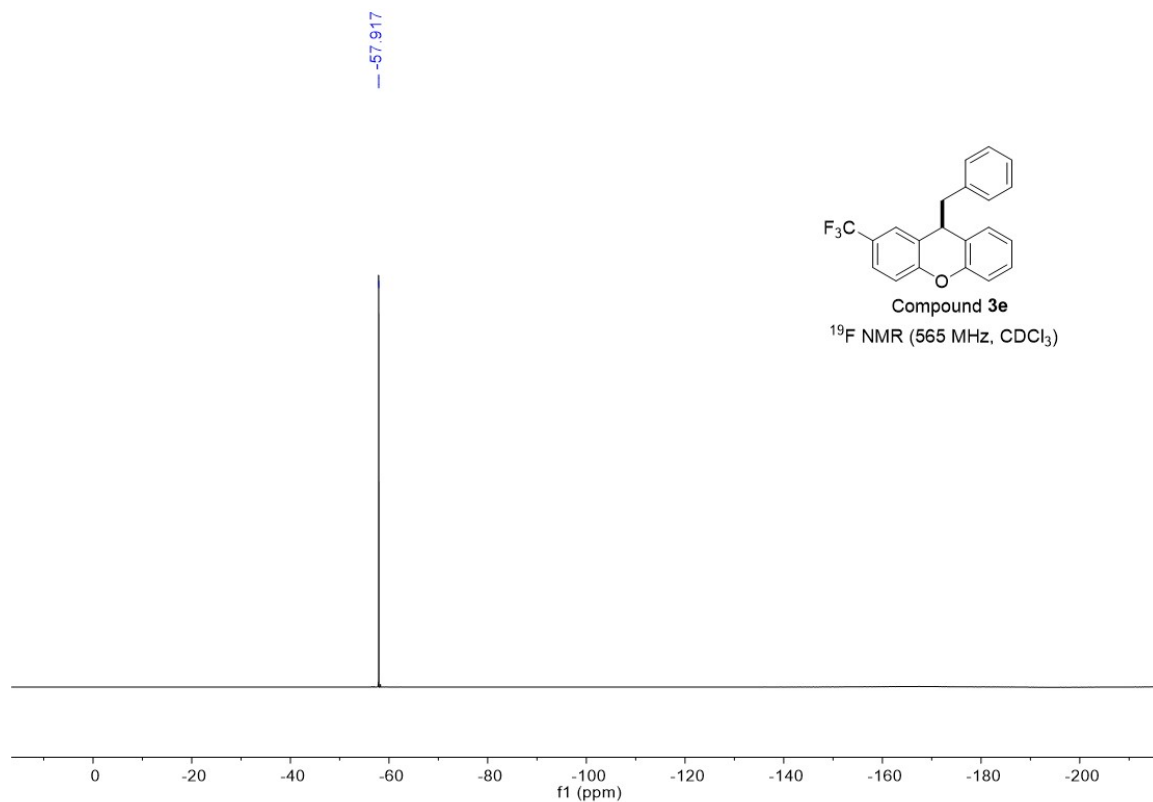

NMR spectra of 9-benzyl-1,3-dimethyl-9H-xanthene (3f)

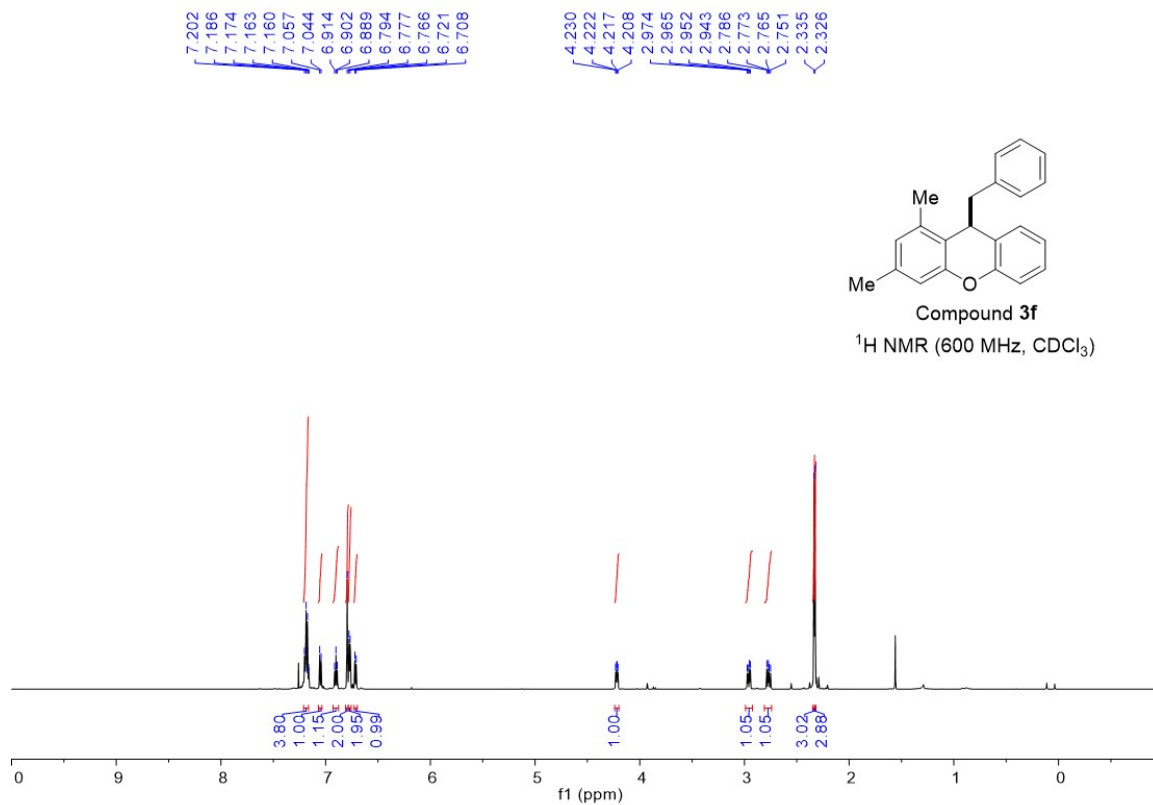

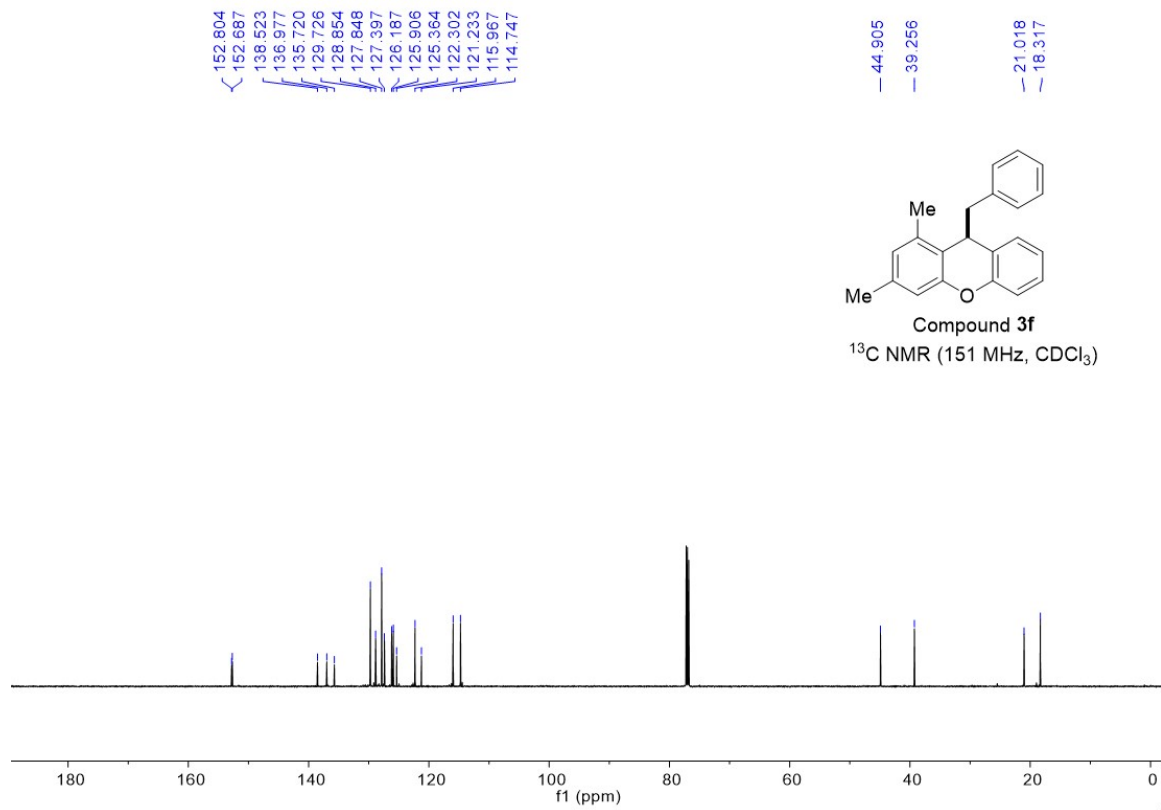

NMR spectra of 9-benzyl-2,3-dimethyl-9H-xanthene (**3g**)

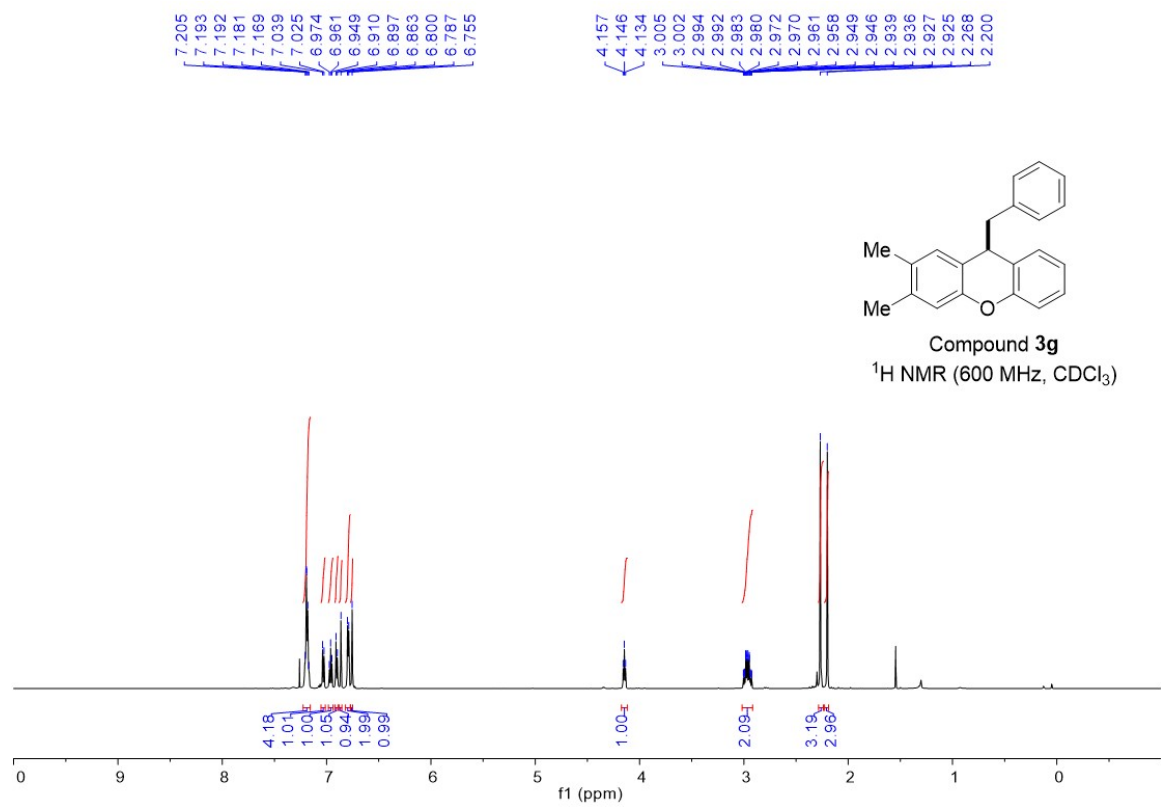

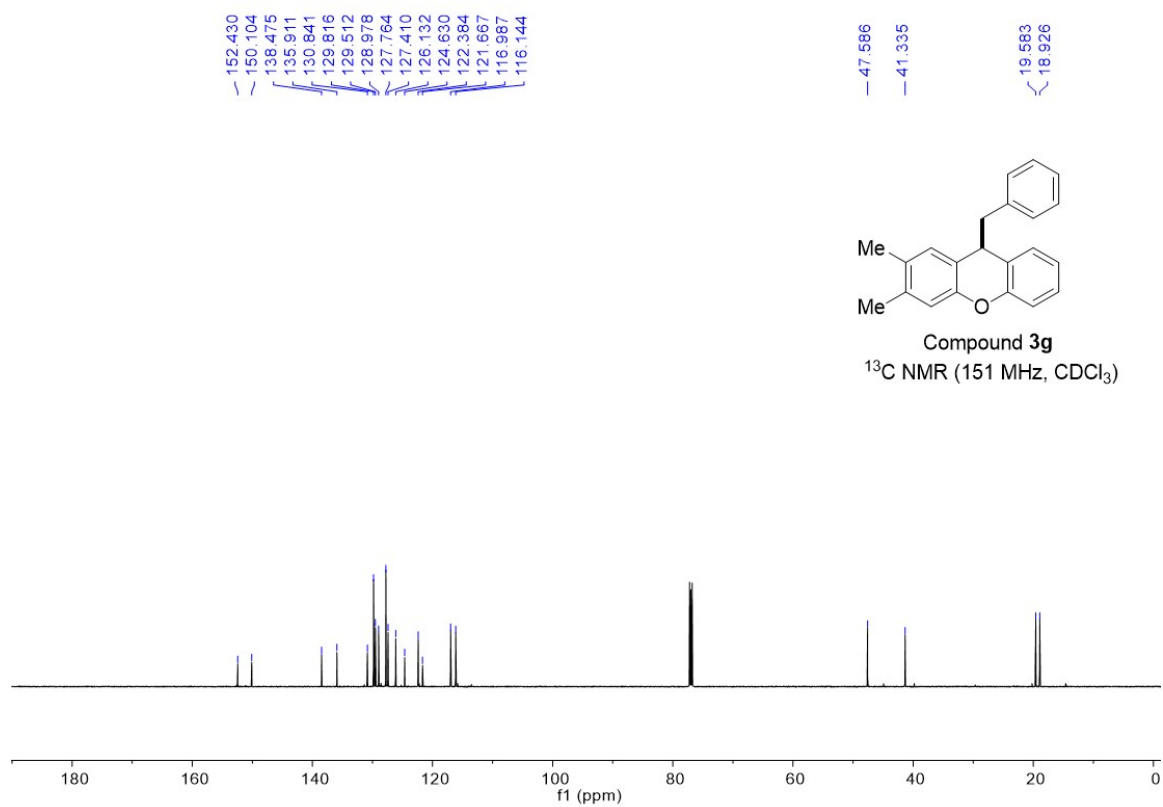

NMR spectra of 10-benzyl-1,2,3,10-tetrahydrocyclopenta[*b*]xanthene (**3h**)

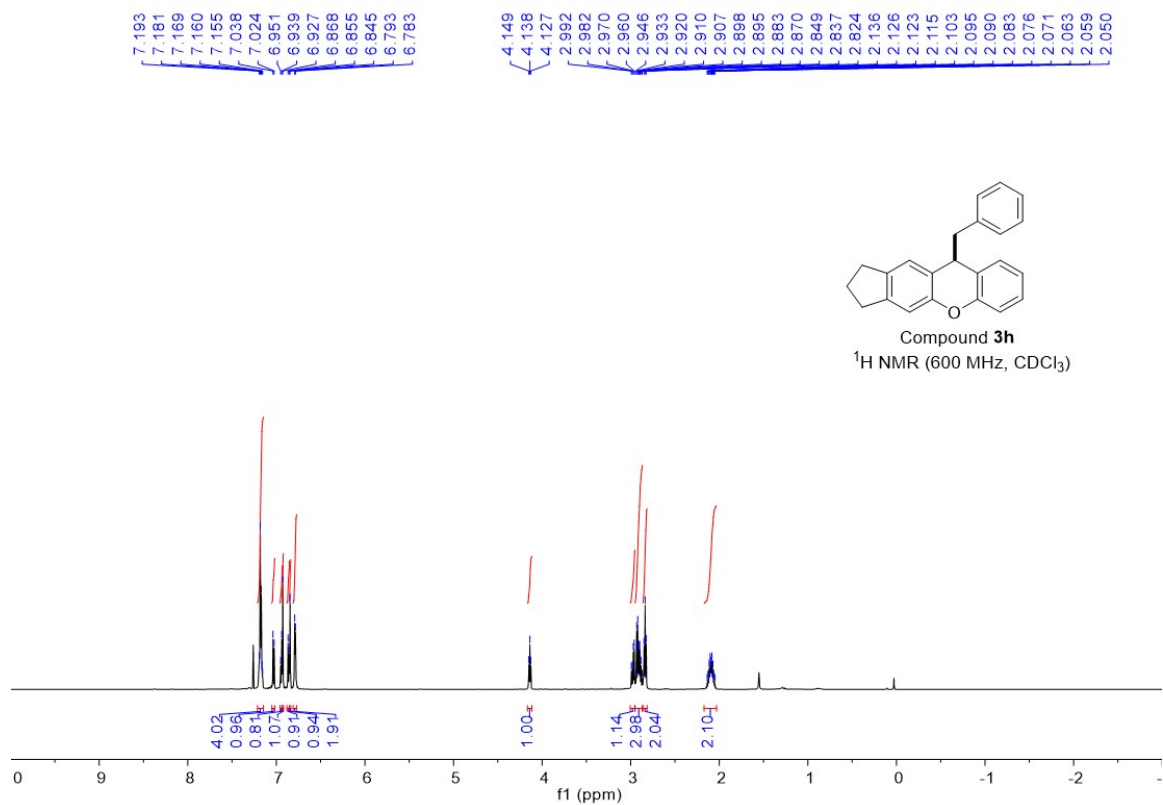

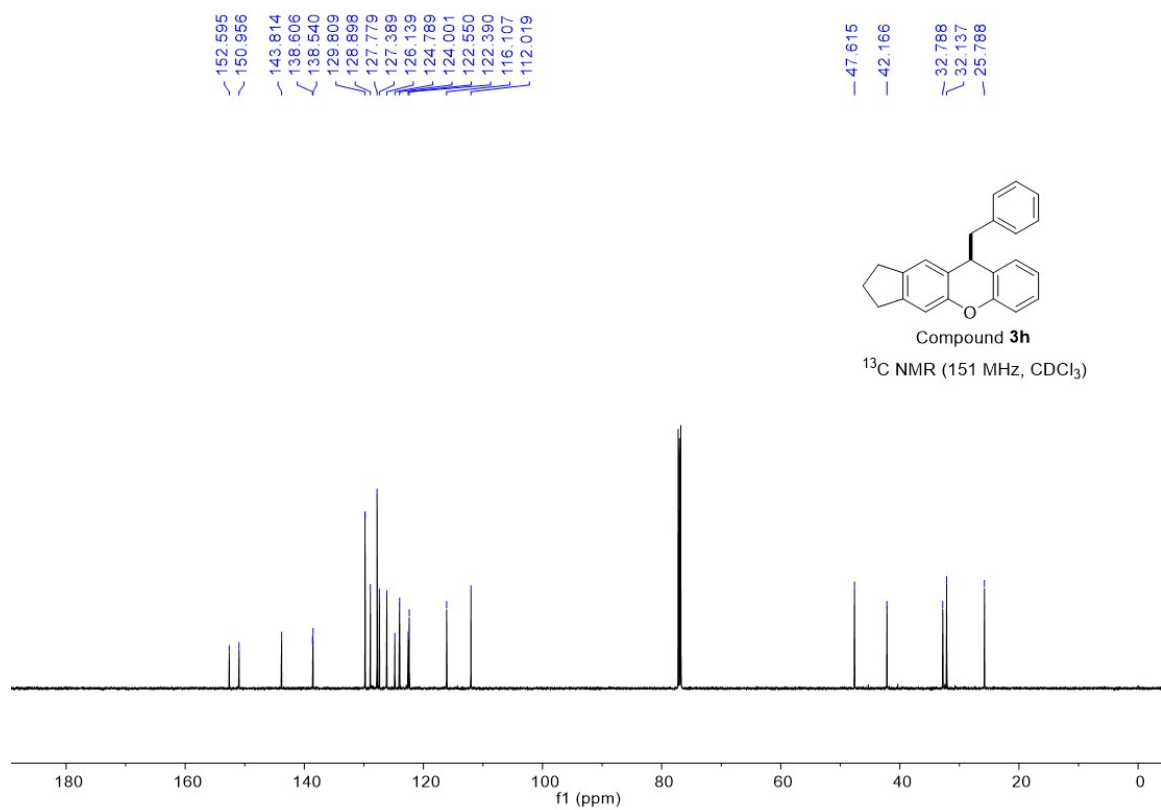

NMR spectra of 7-benzyl-7H-benzo[c]xanthene (**3i**)

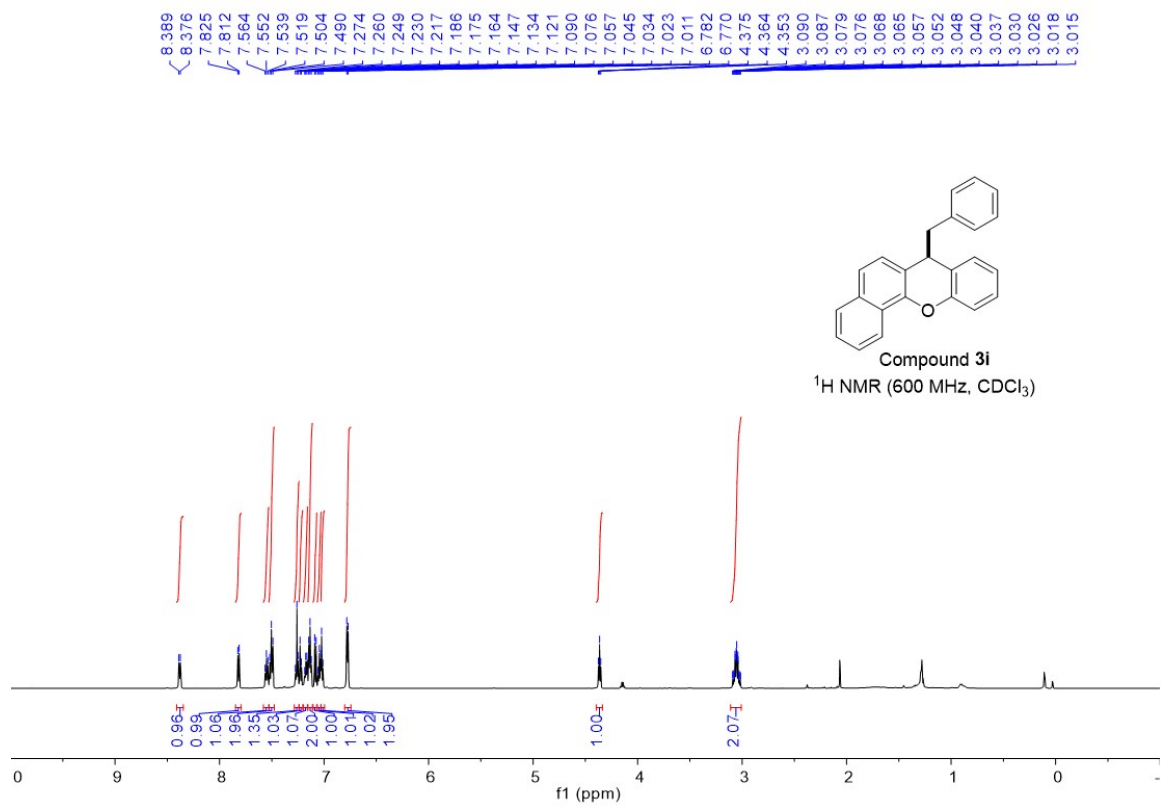

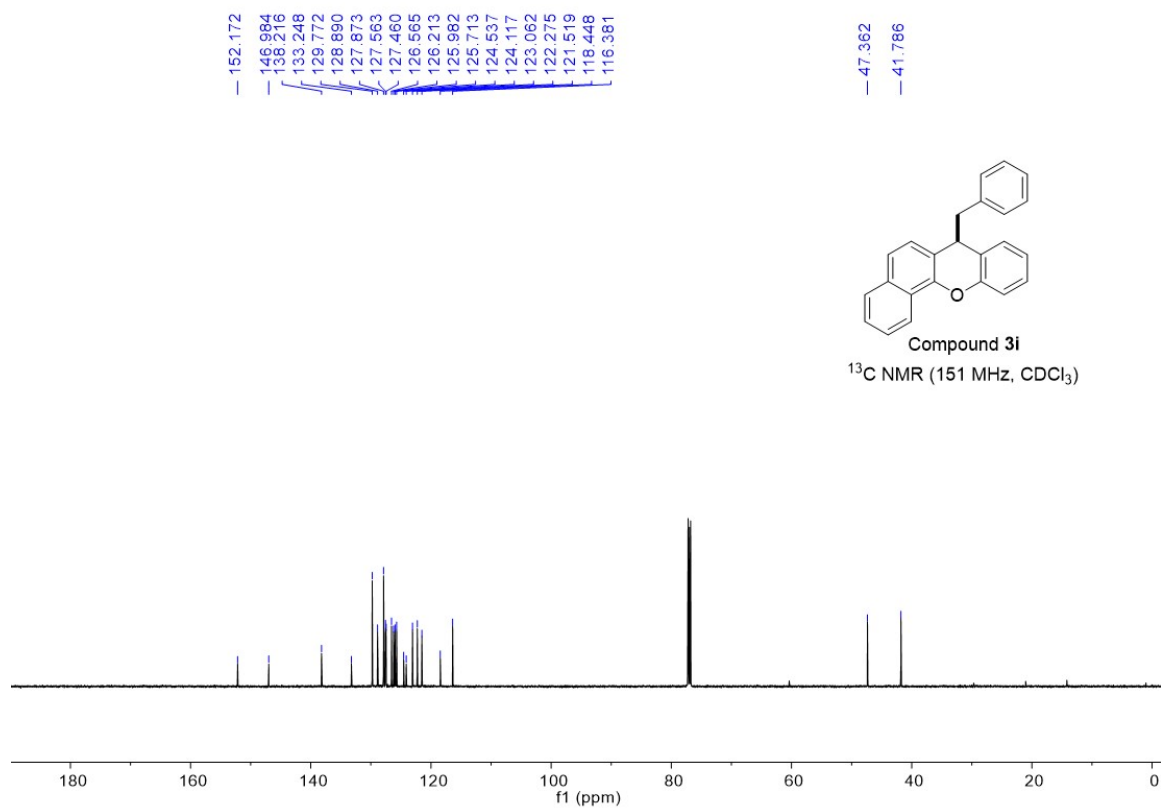

NMR spectra of 12-benzyl-12*H*-benzo[*a*]xanthene (**3j**)

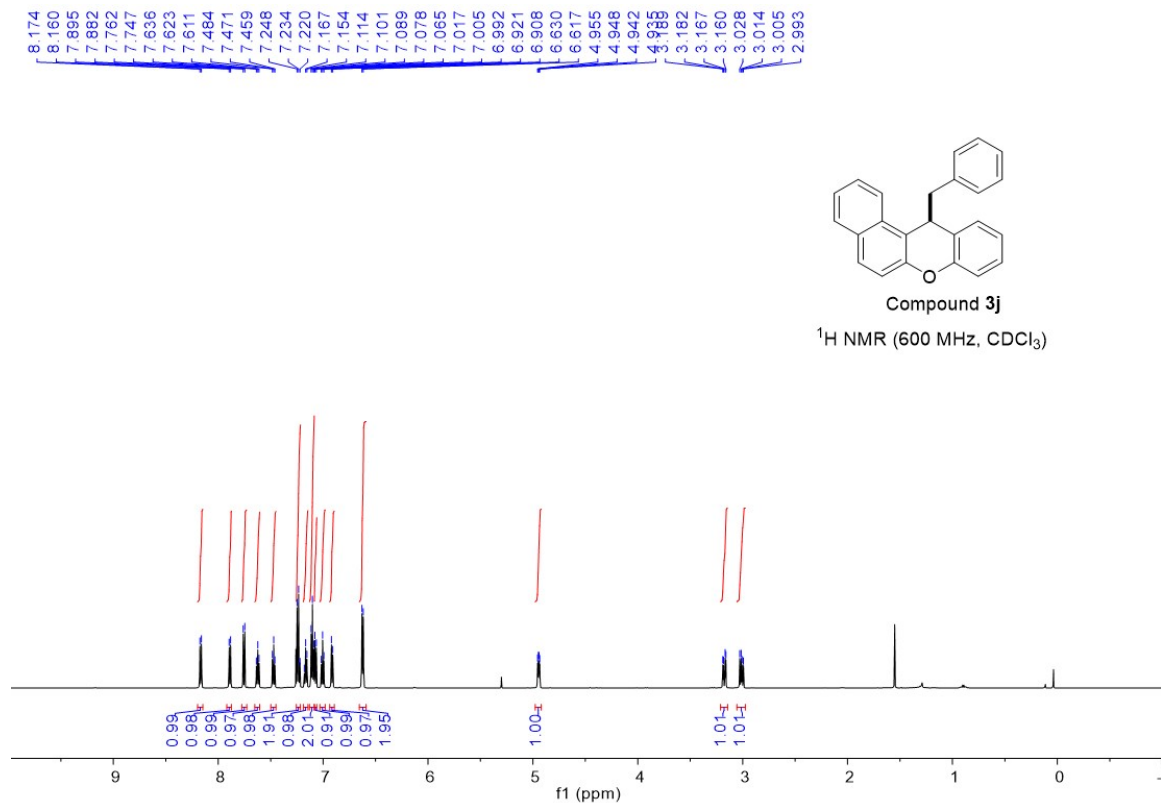

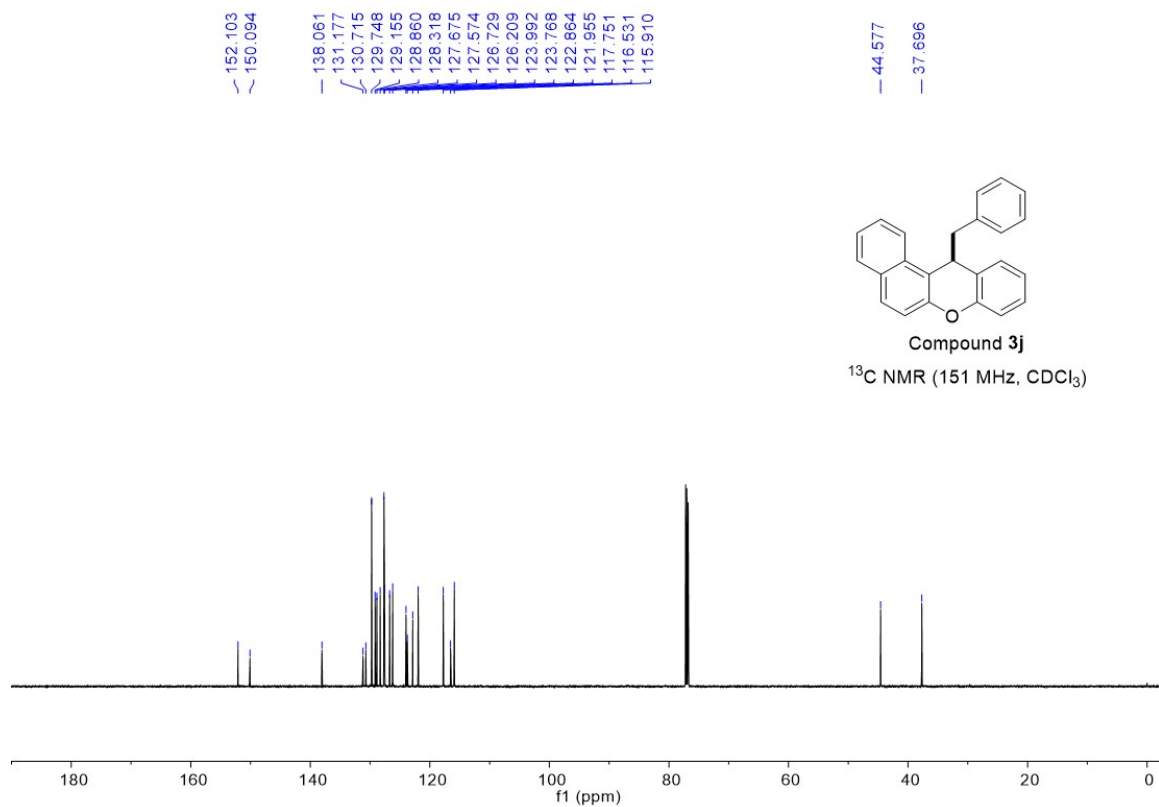

NMR spectra of 12-benzyl-10-methyl-12*H*-benzo[*a*]xanthene (**3k**)

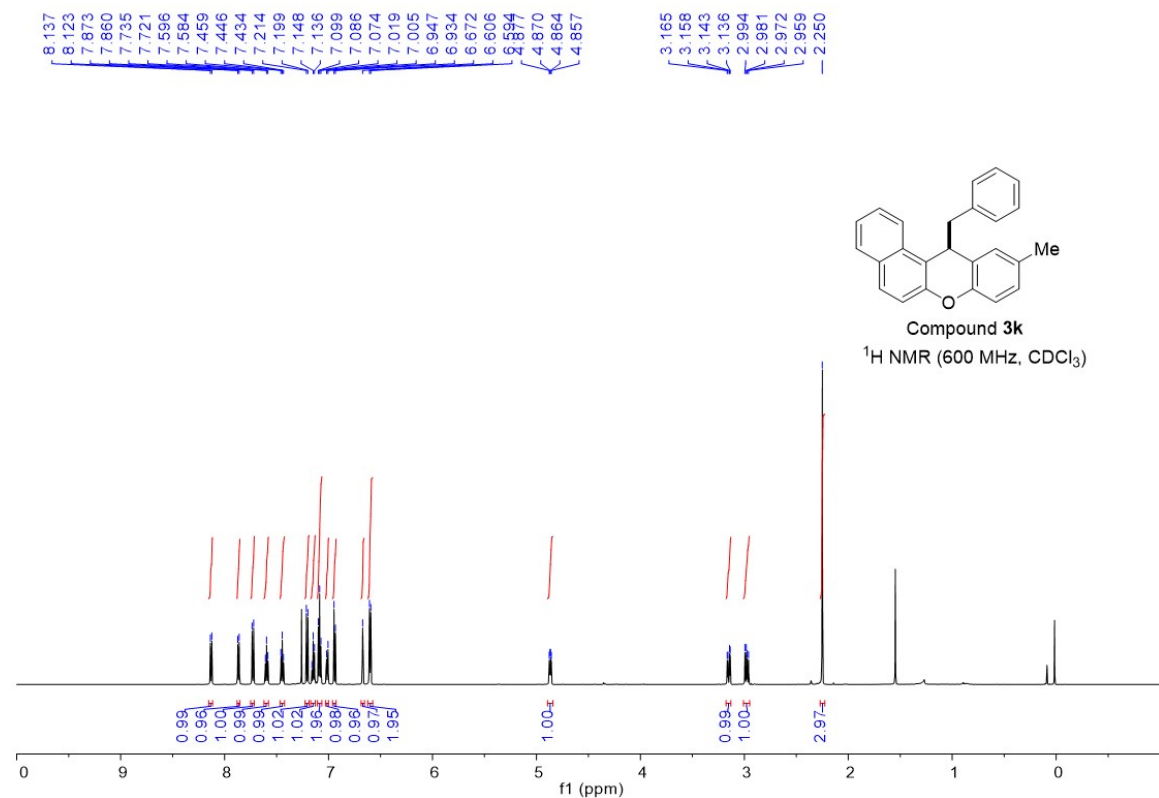



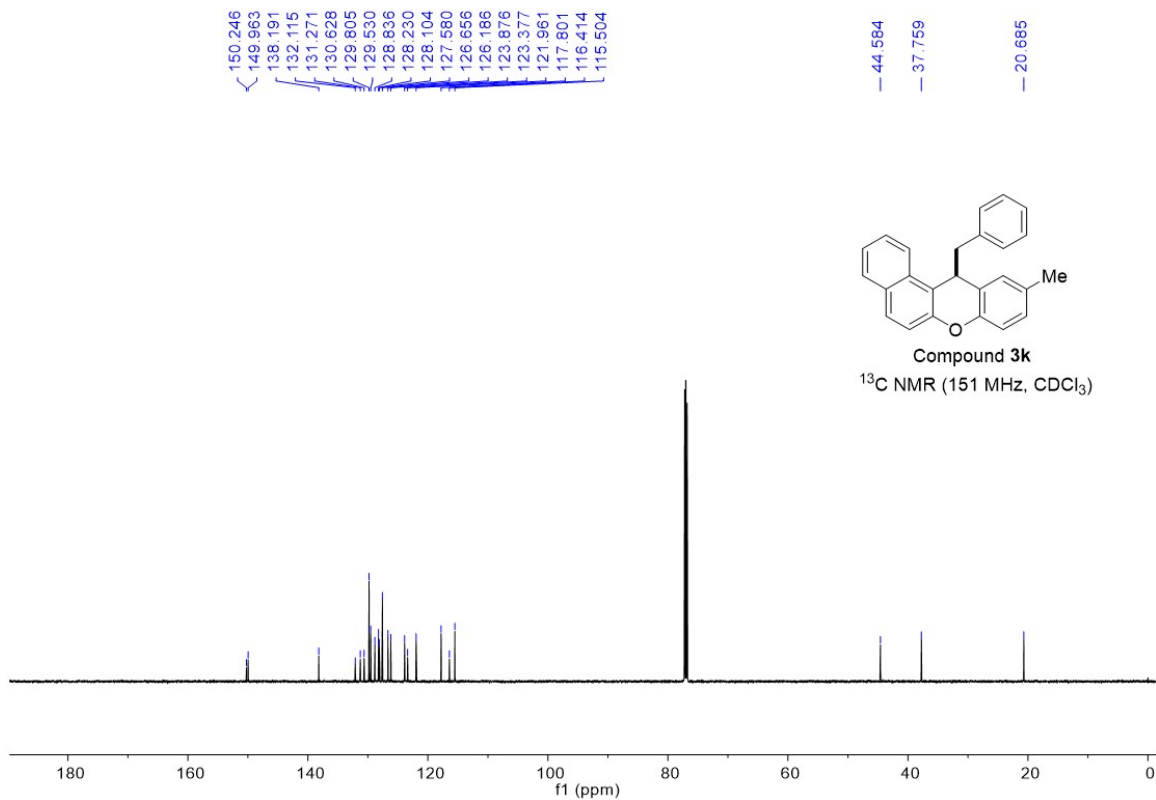

NMR spectra of 2-chloro-9-(4-methoxyphenyl)-6-(trifluoromethyl)-9H-xanthene (**3I**)

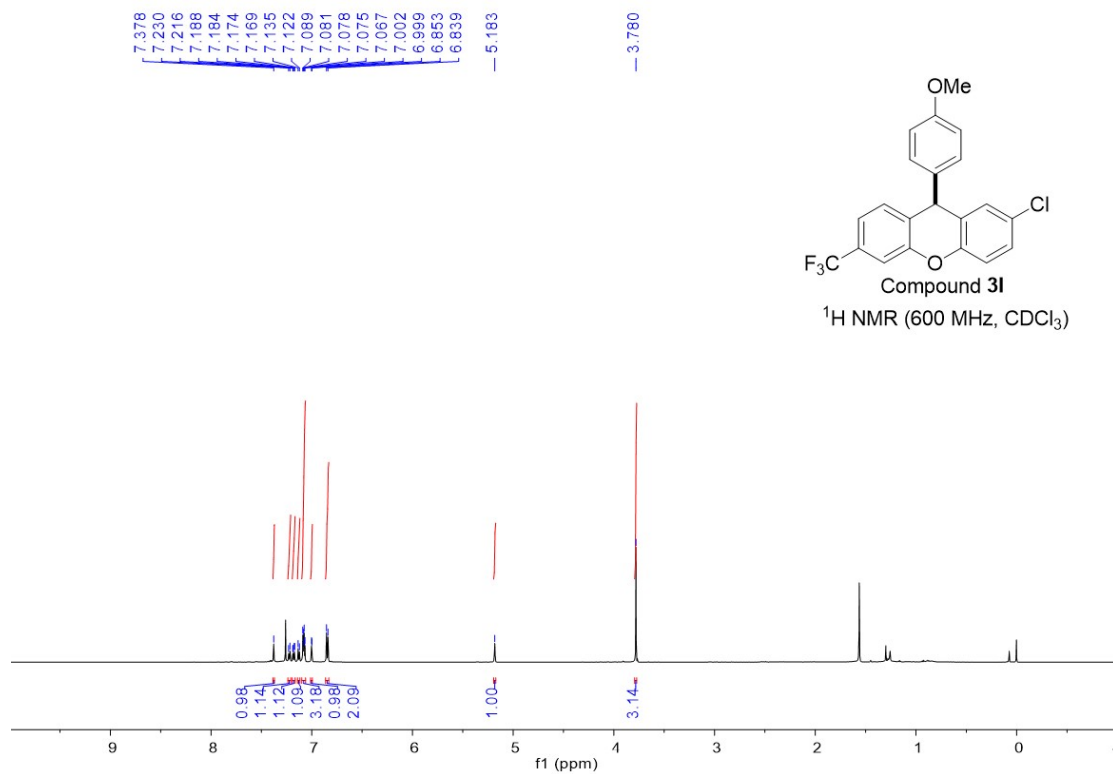

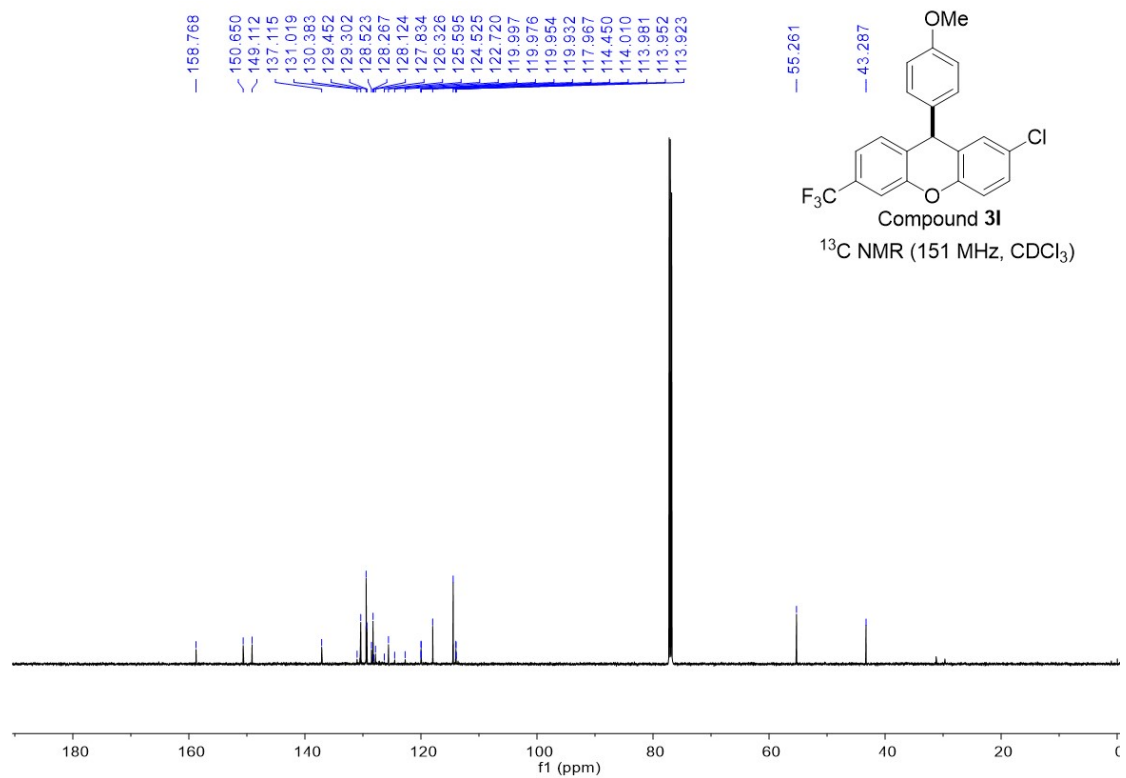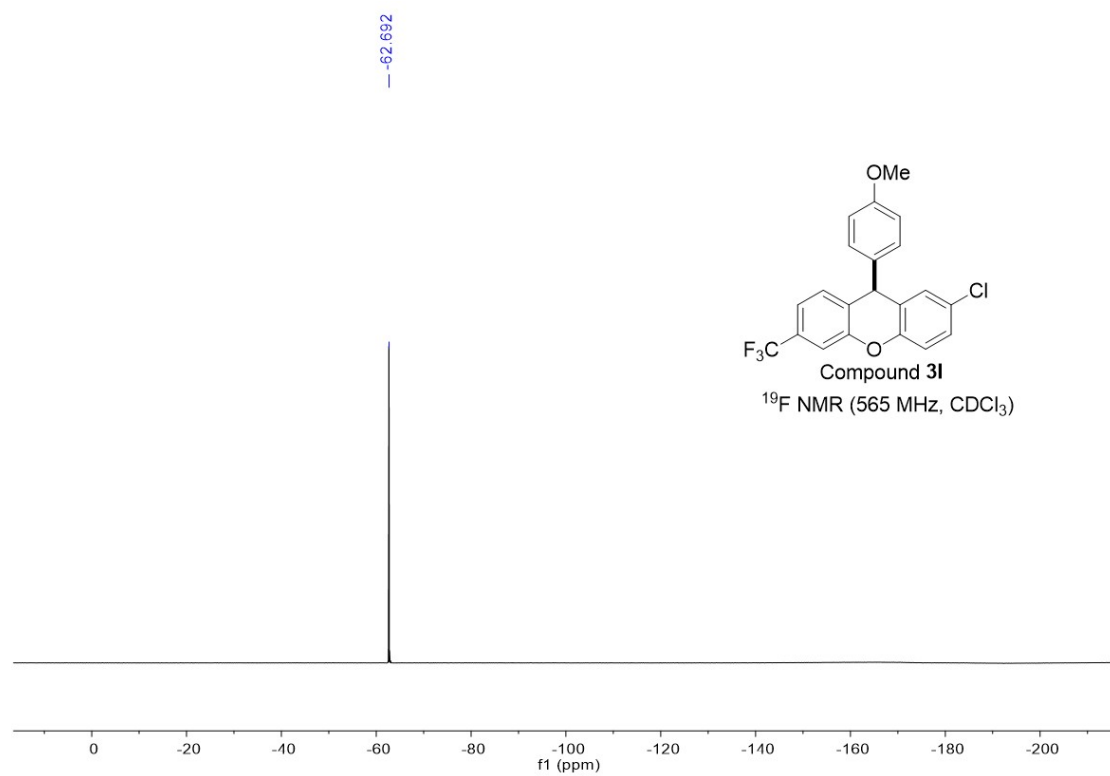

NMR spectra of 9-benzyl-9*H*-thioxanthene (**3m**)

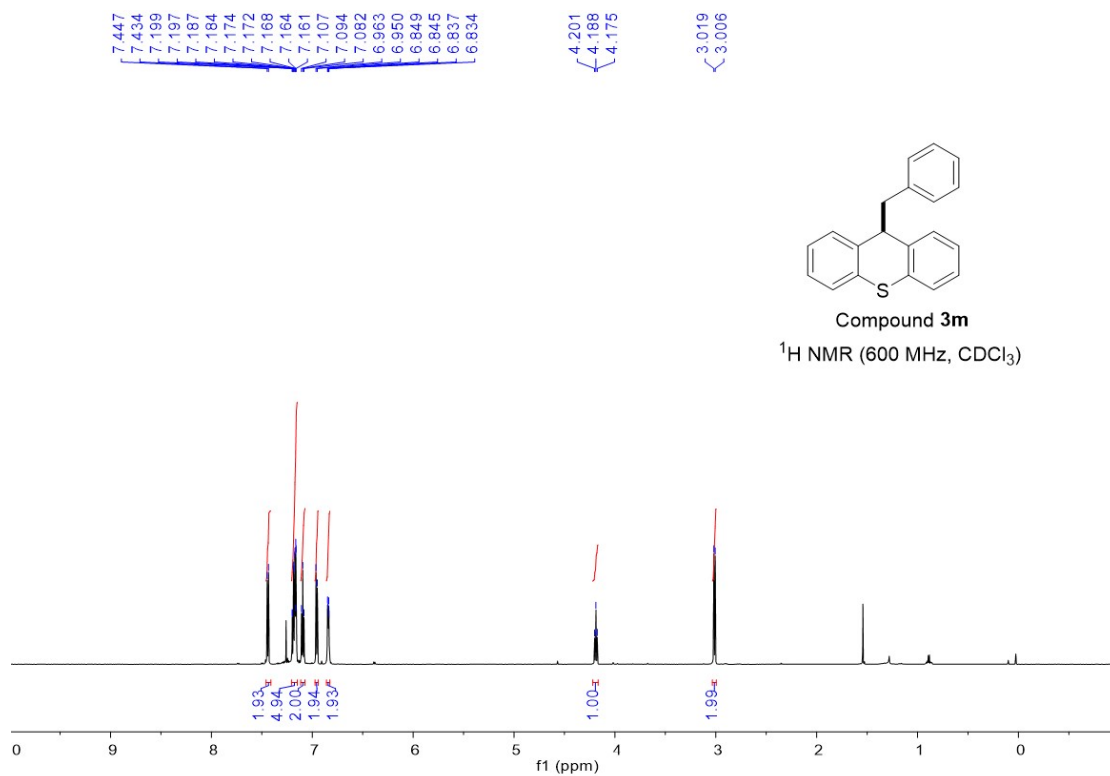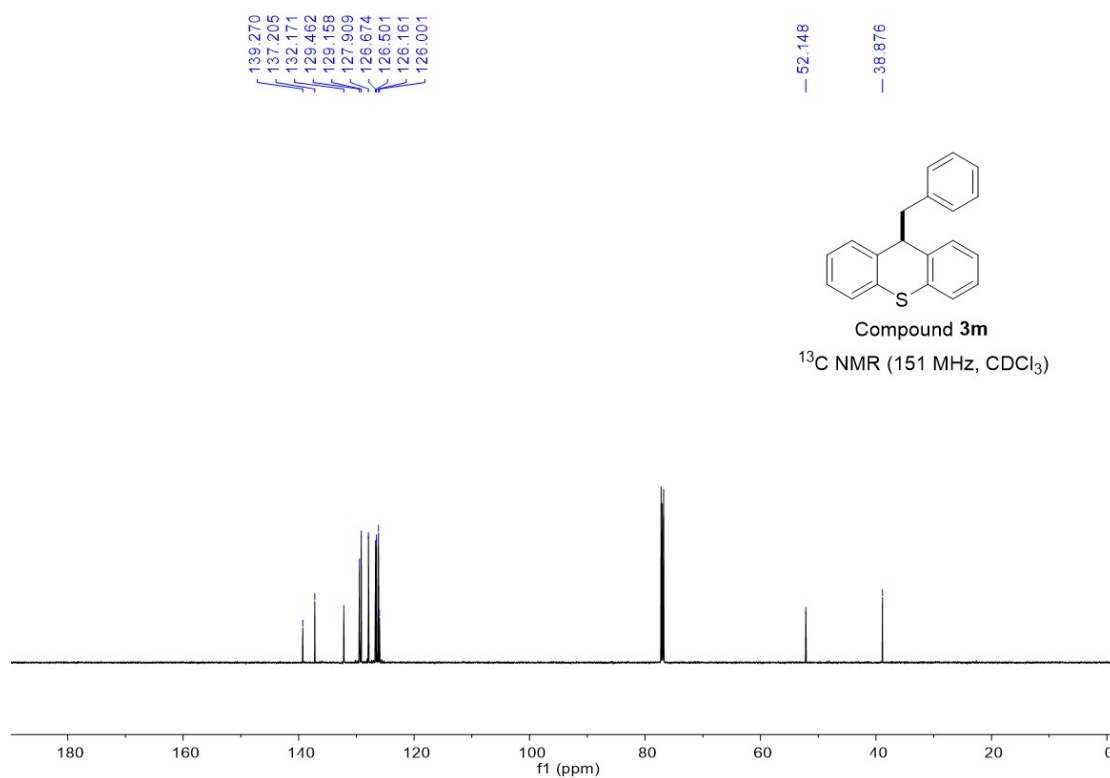

NMR spectra of 9-(4-methylbenzyl)-9H-thioxanthene (**3n**)

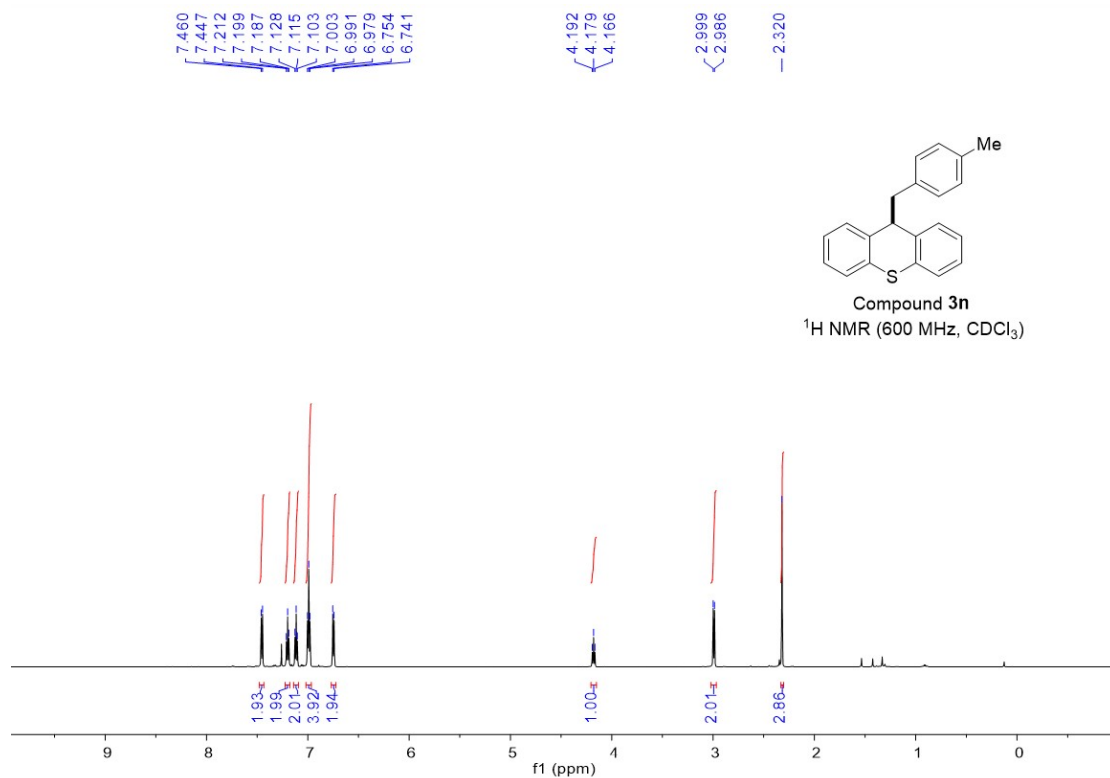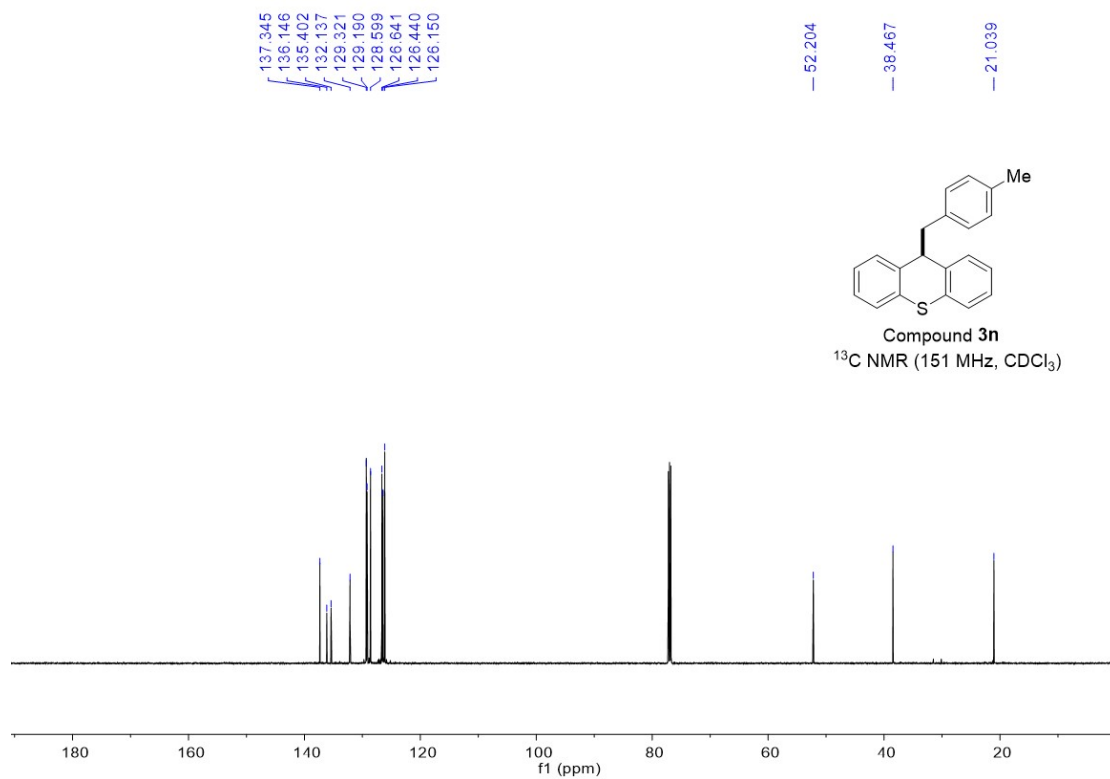

NMR spectra of 9-(3-methylbenzyl)-9*H*-thioxanthene (**3o**)

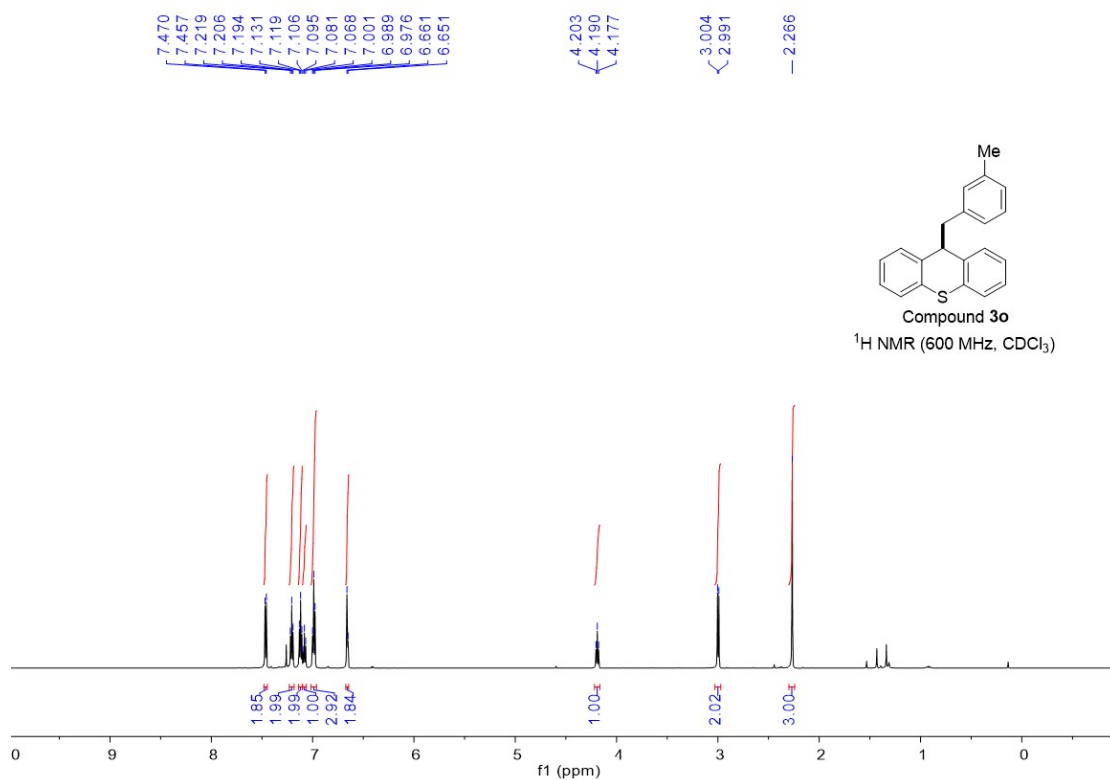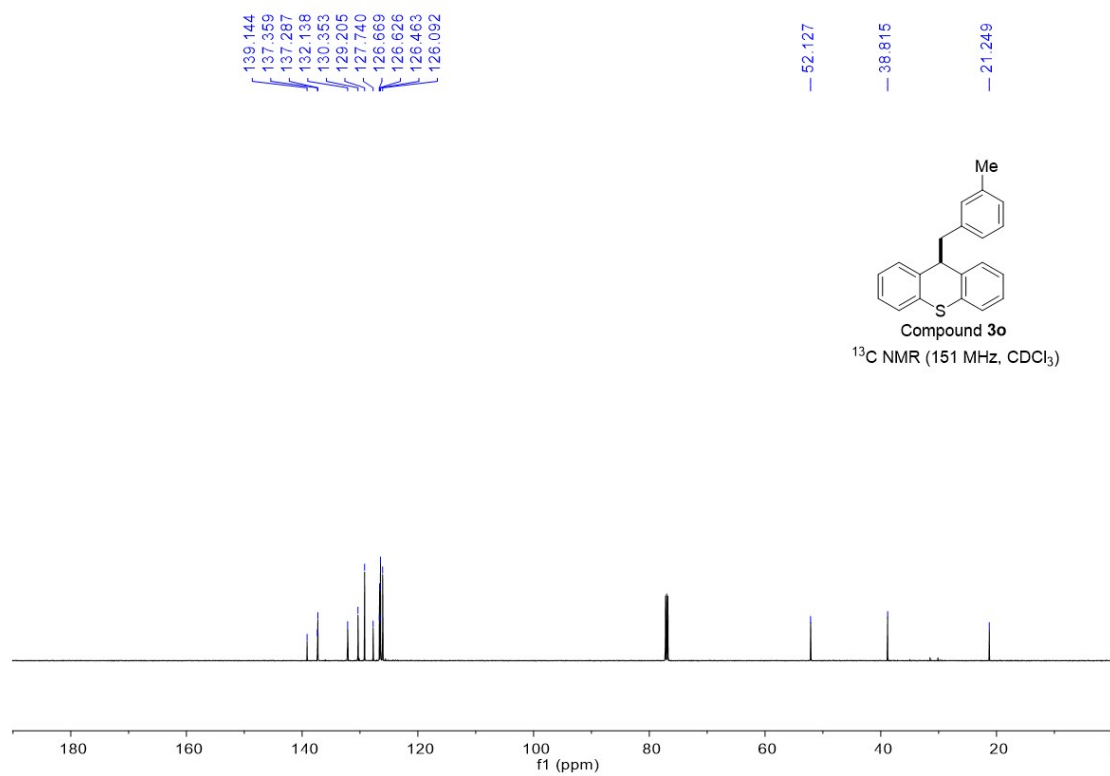

NMR spectra of 9-(3,5-dimethylbenzyl)-9H-thioxanthene (**3p**)

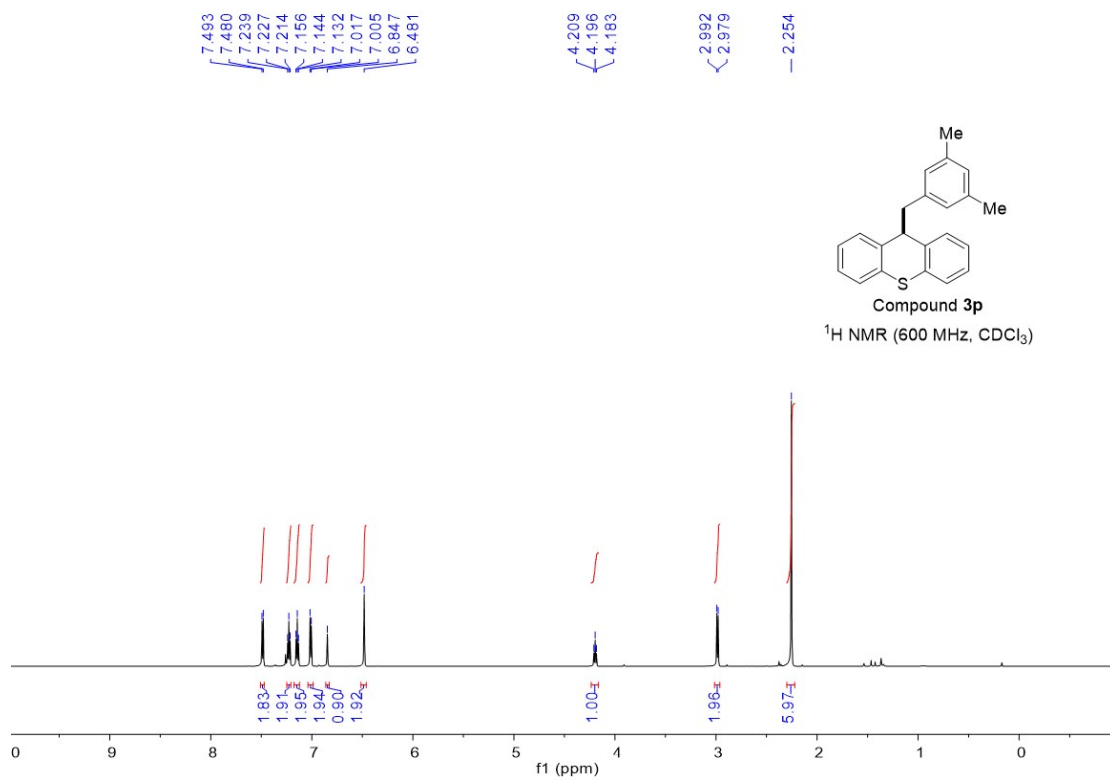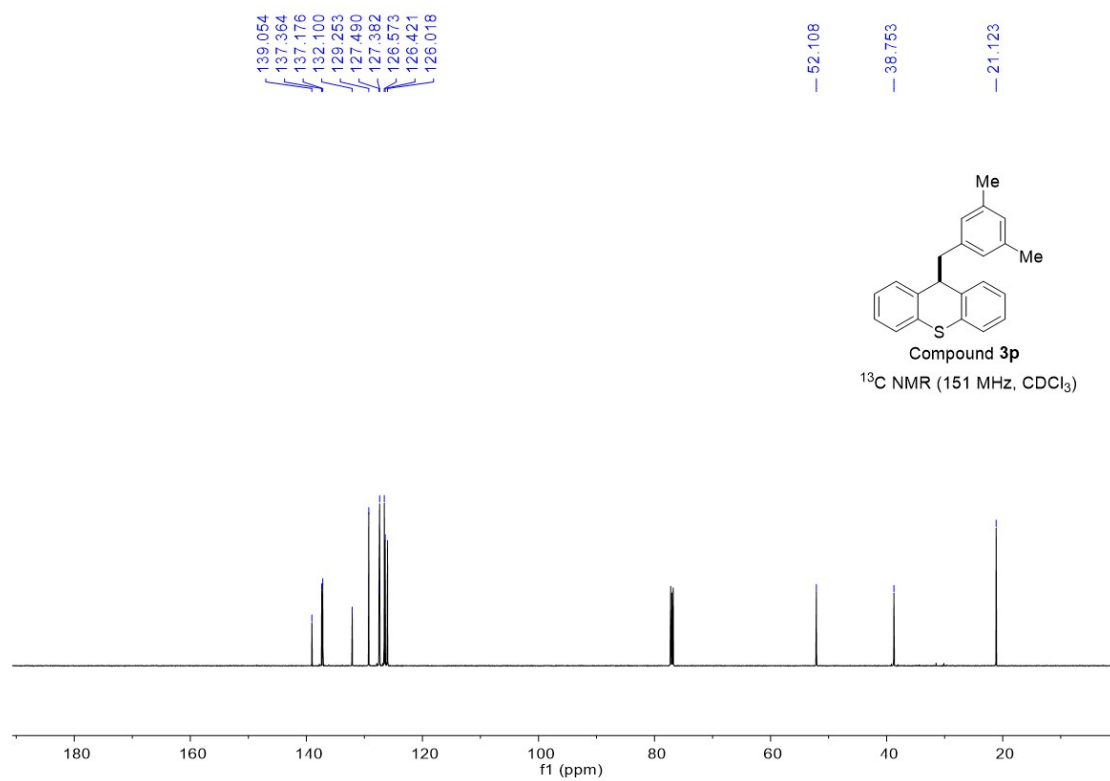

NMR spectra of 9-benzyl-2-methyl-9H-thioxanthene (**3q**)

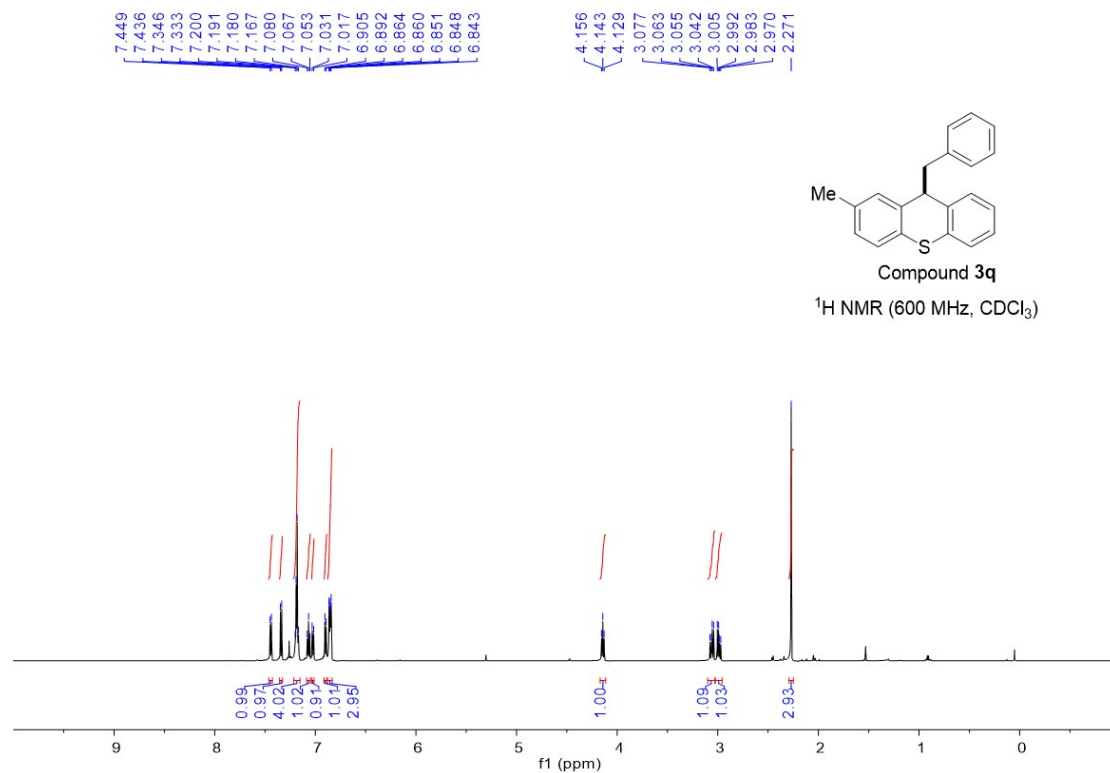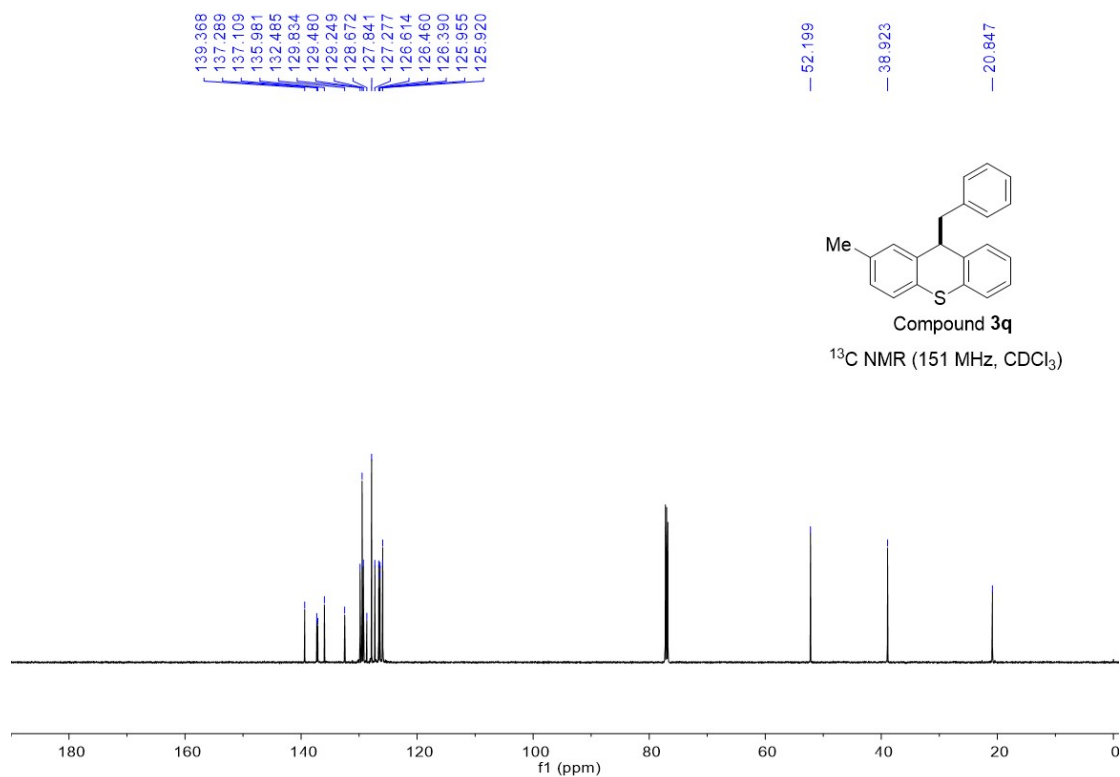

NMR spectra of 9-benzyl-2-chloro-9H-thioxanthene (**3r**)

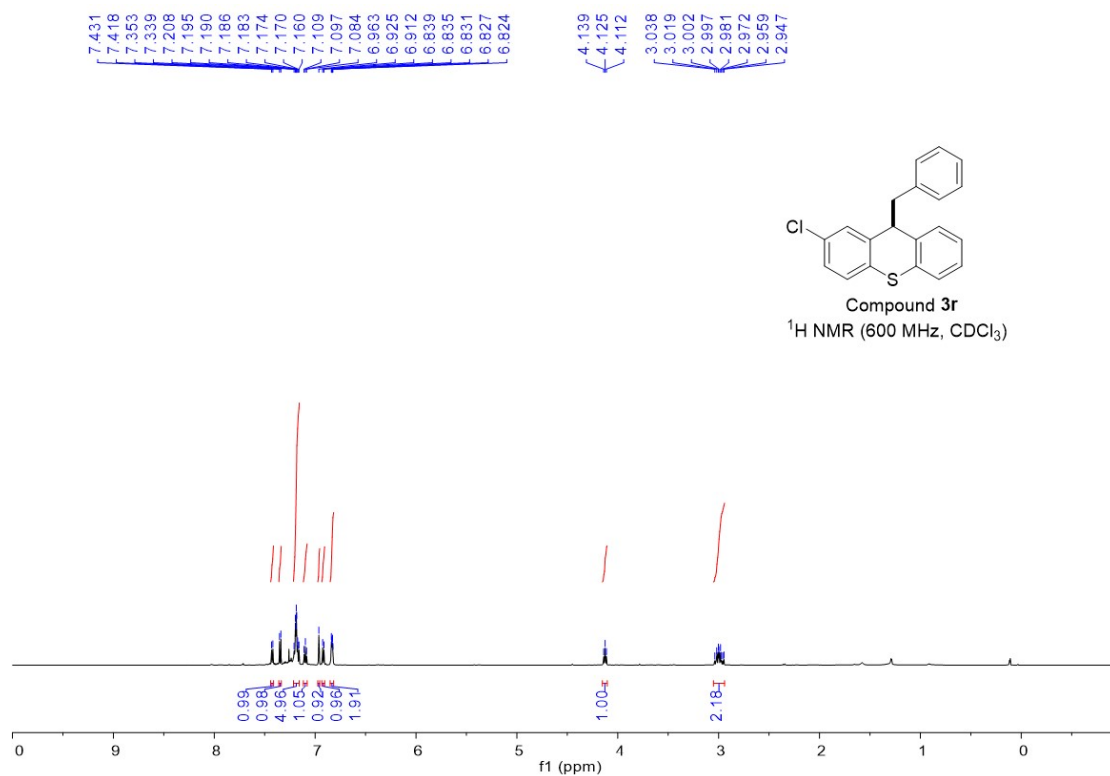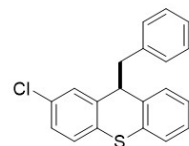

Compound **3r**  
<sup>1</sup>H NMR (600 MHz, CDCl<sub>3</sub>)

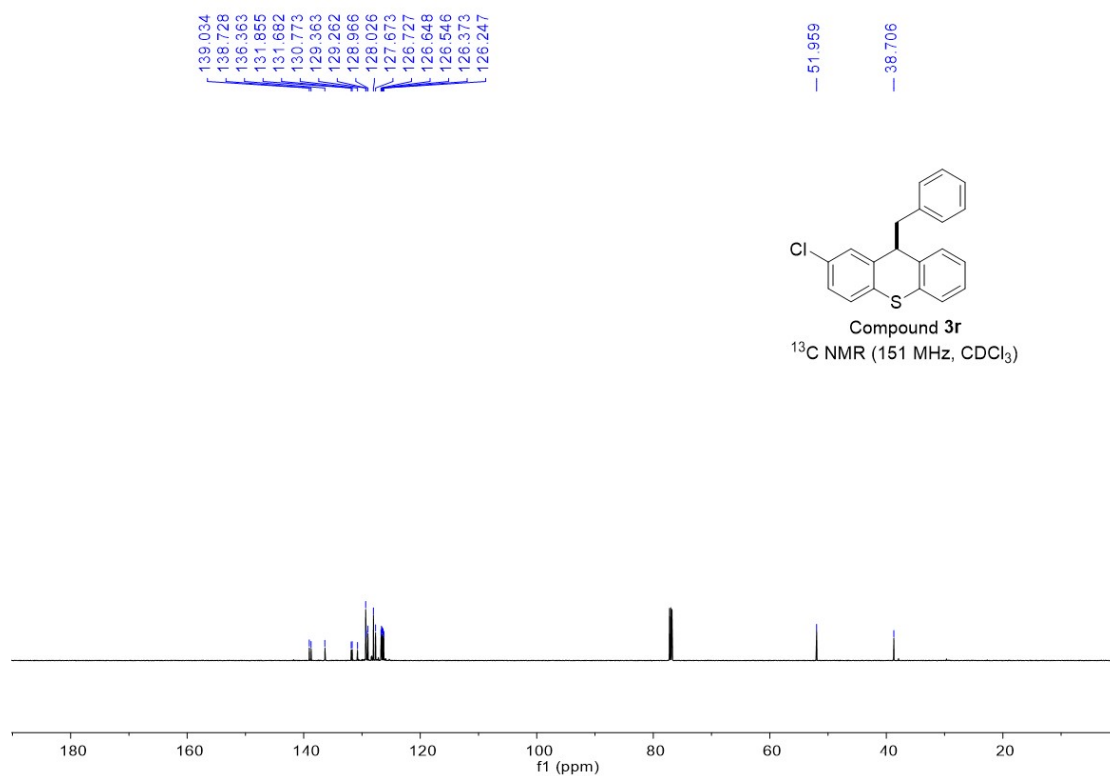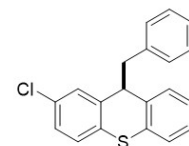

Compound **3r**  
<sup>13</sup>C NMR (151 MHz, CDCl<sub>3</sub>)



# NMR spectra of 9-benzyl-9H-fluorene (3s)

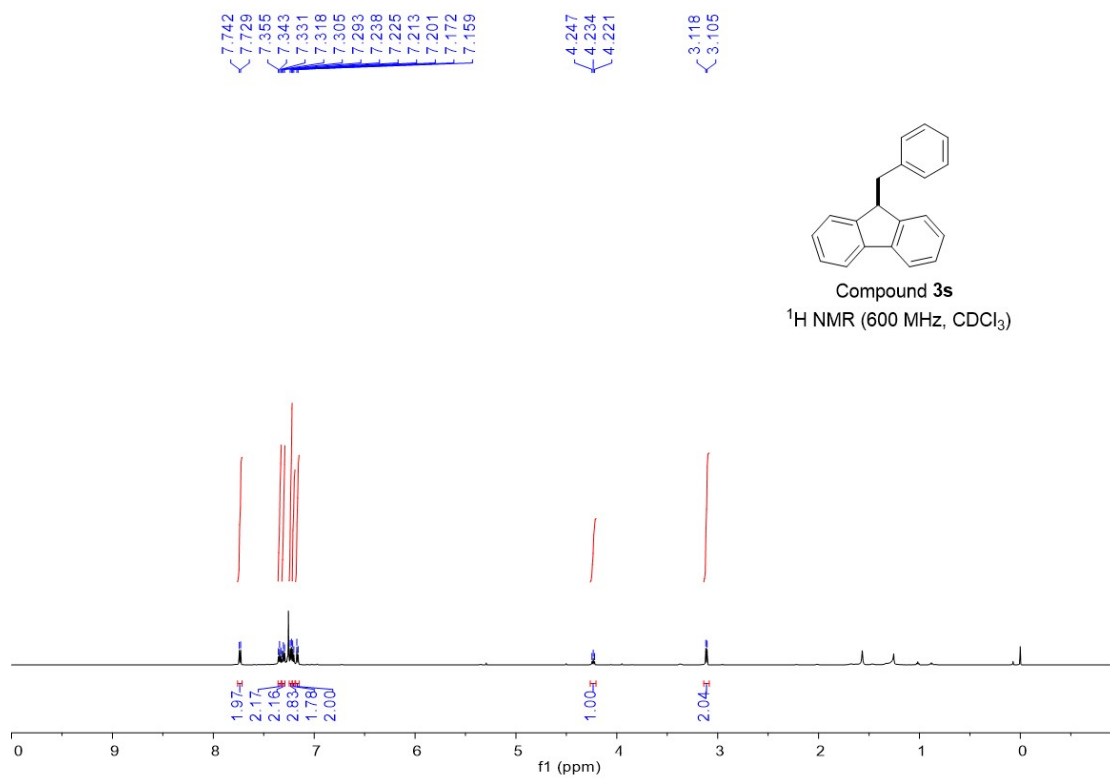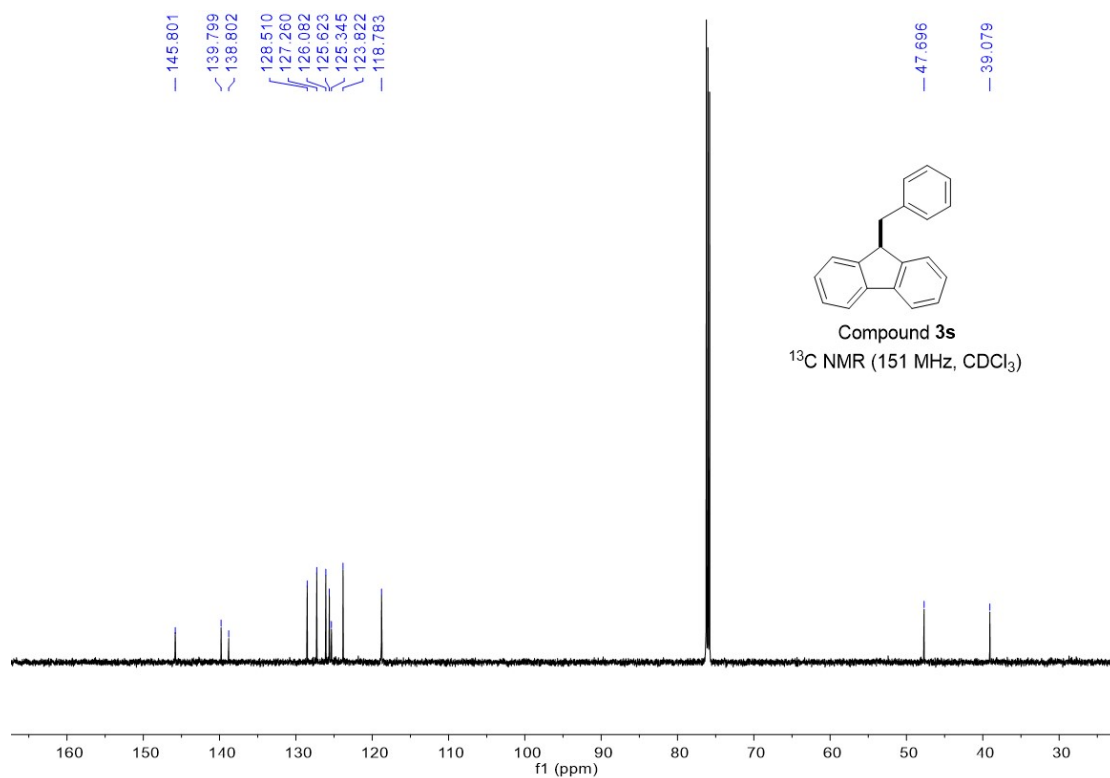

NMR spectra of 9-benzyl-10-phenyl-9,10-dihydroacridine (**3t**)

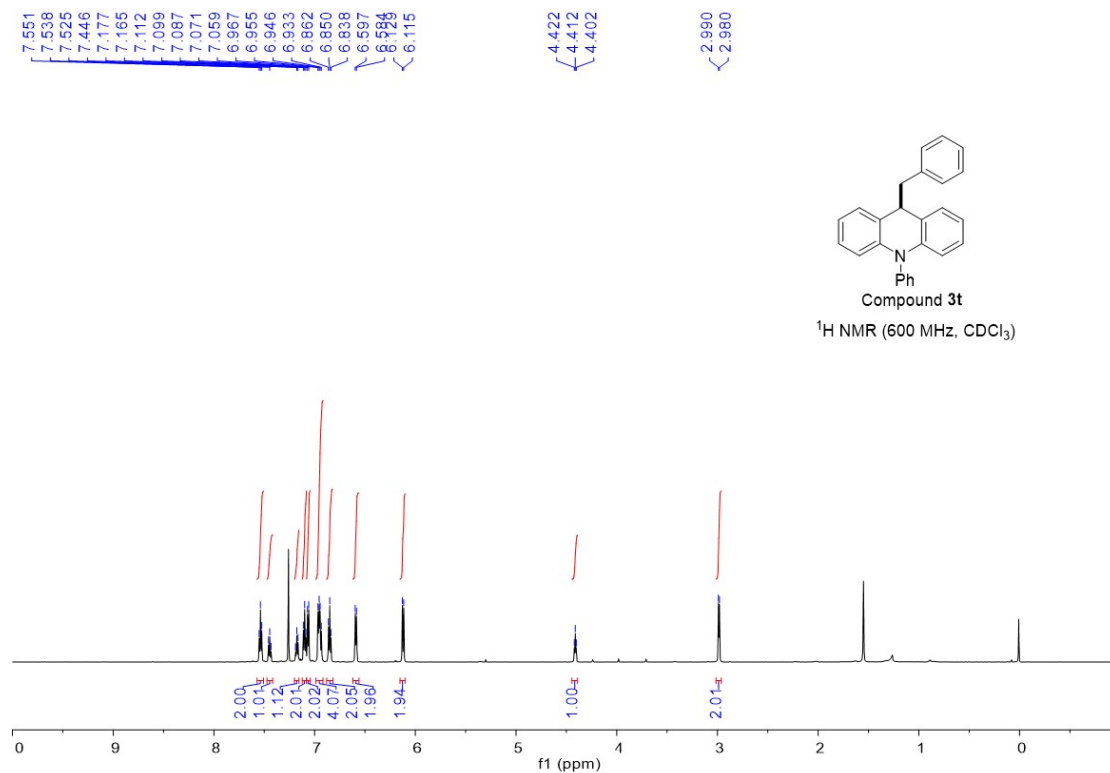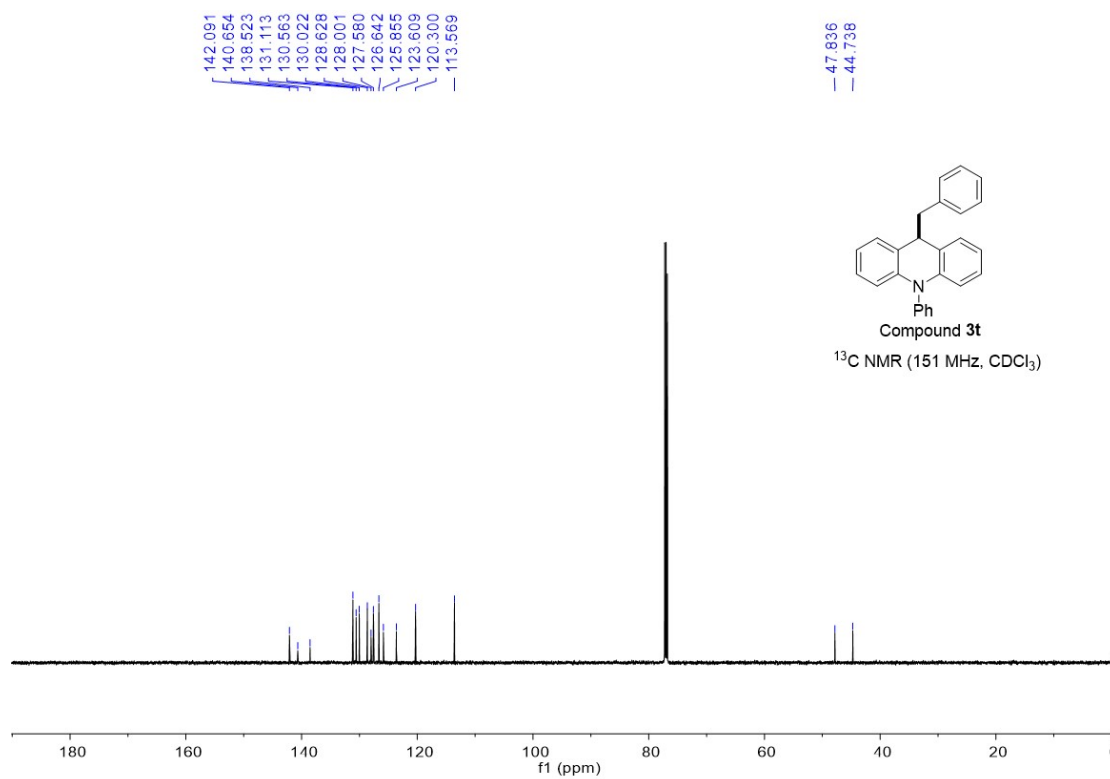

NMR spectra of 9-(4-methylbenzyl)-9H-xanthene (**4a**)

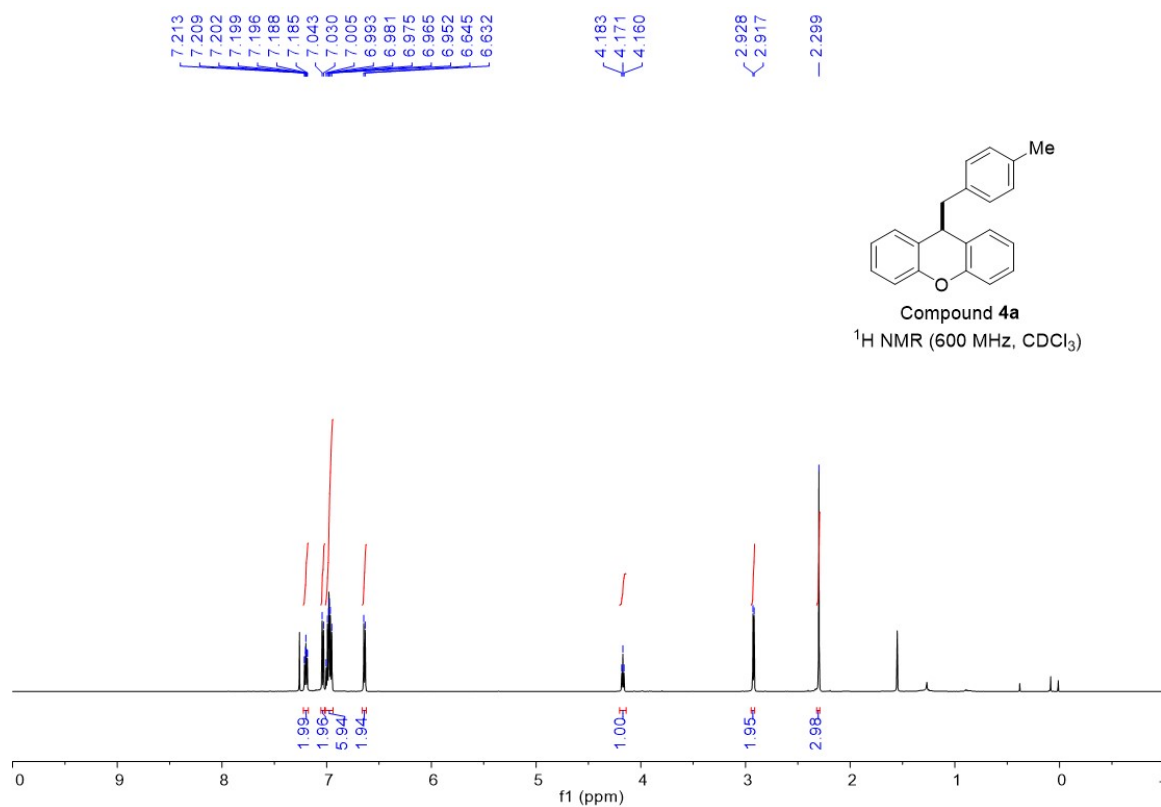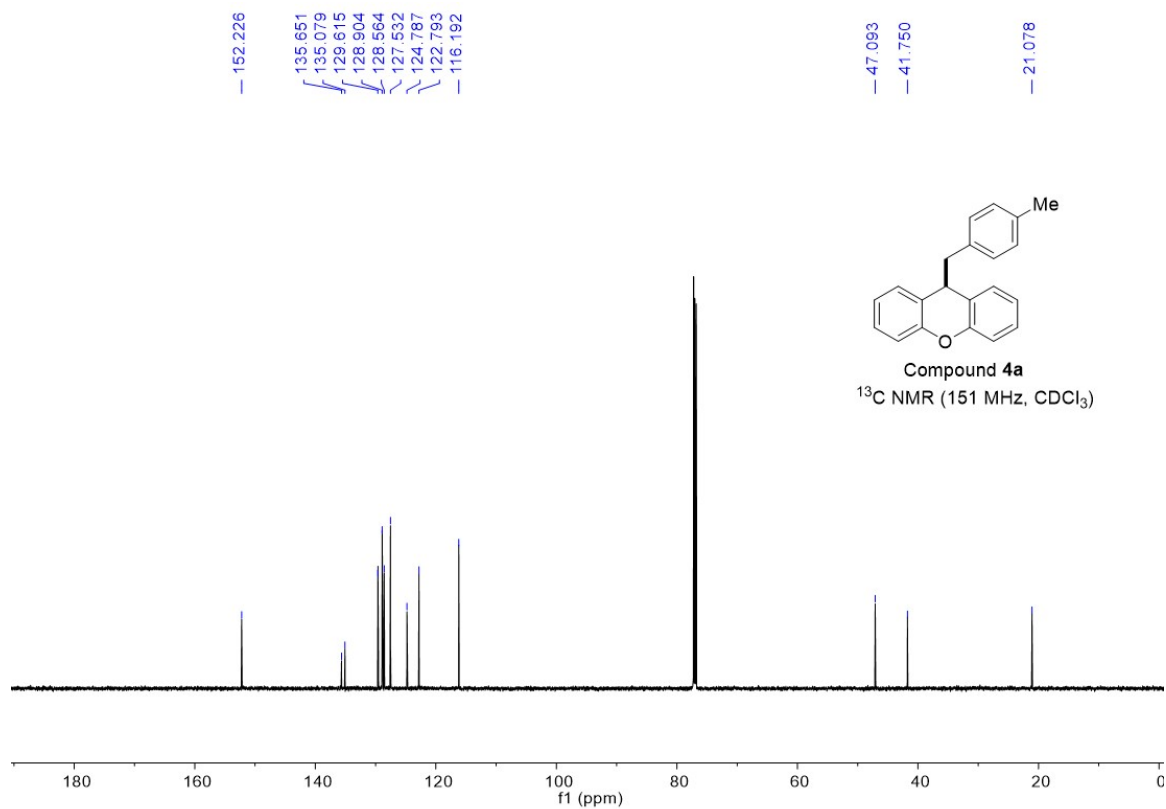

NMR spectra of 9-(4-butylbenzyl)-9H-xanthene (**4b**)

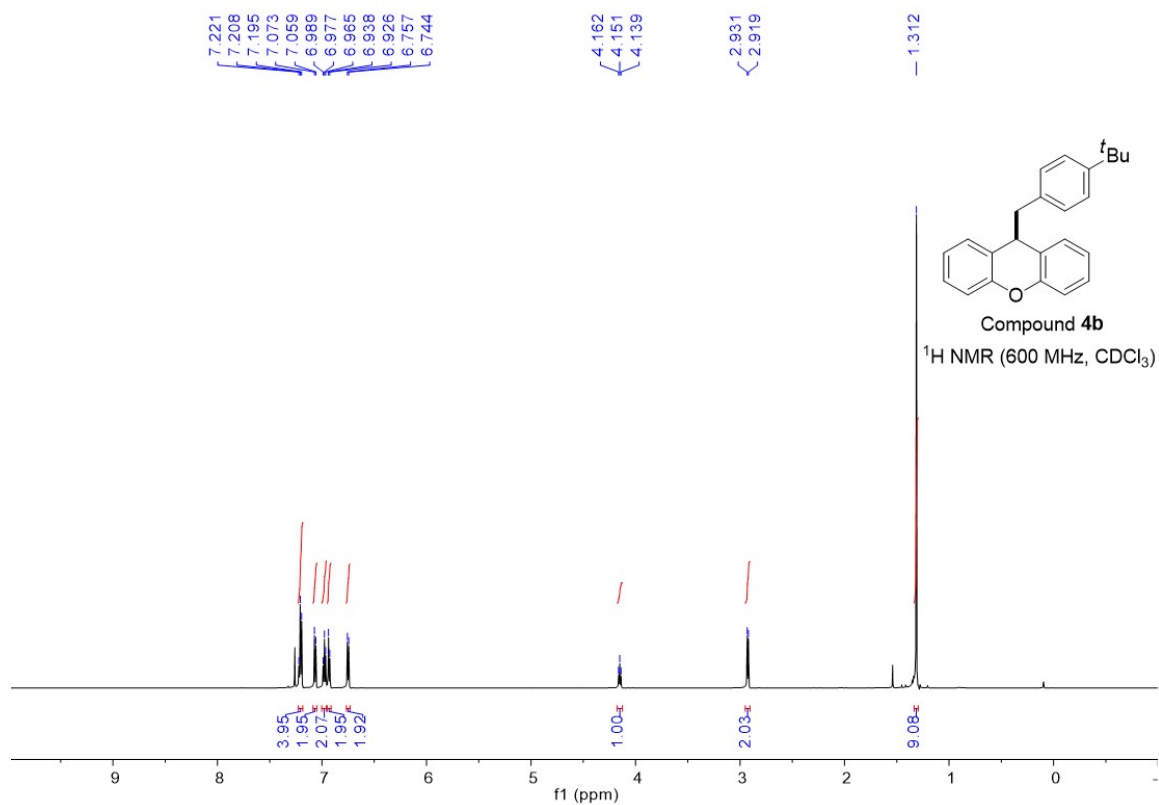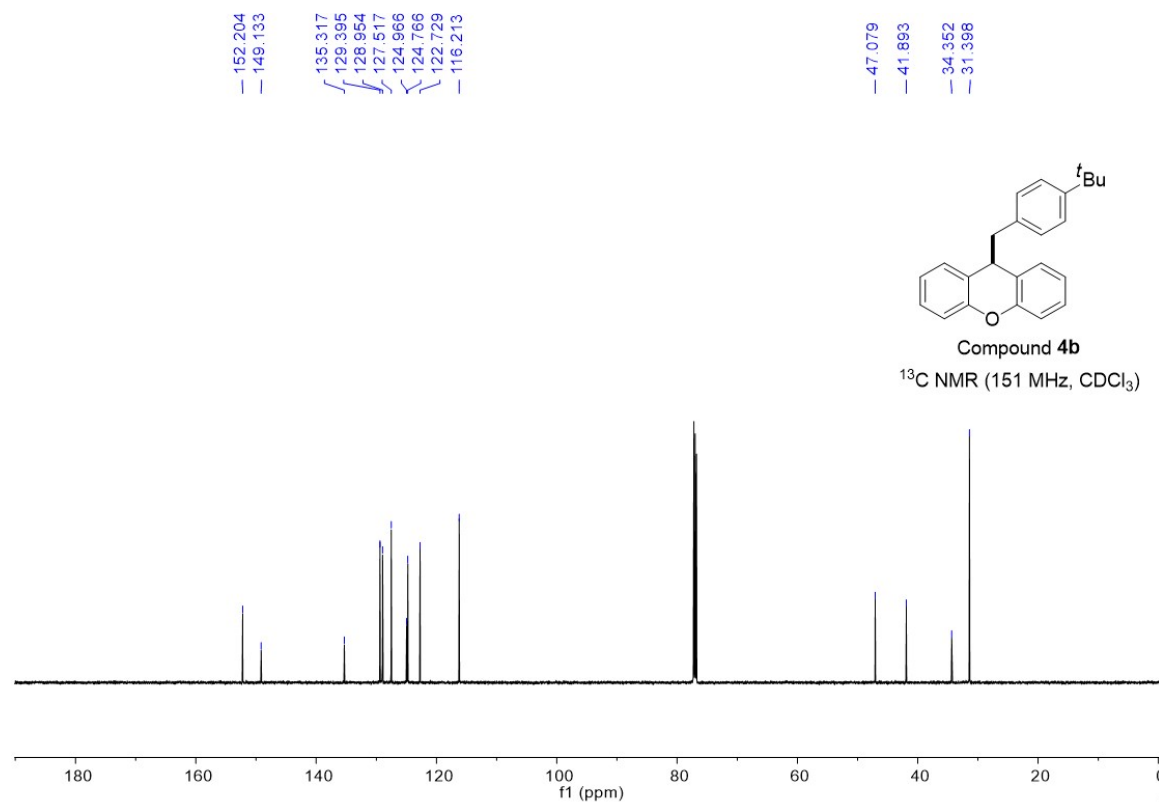

NMR spectra of 9-(4-(trifluoromethoxy)benzyl)-9H-xanthene (**4c**)

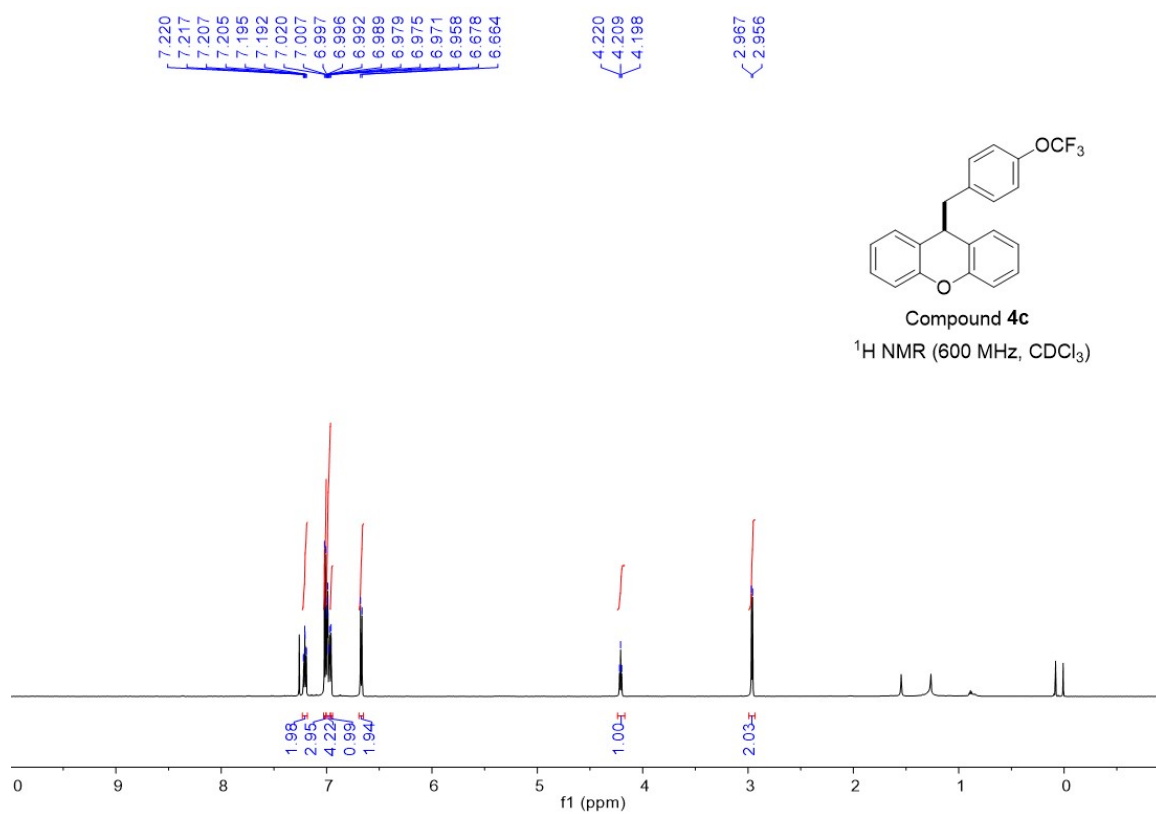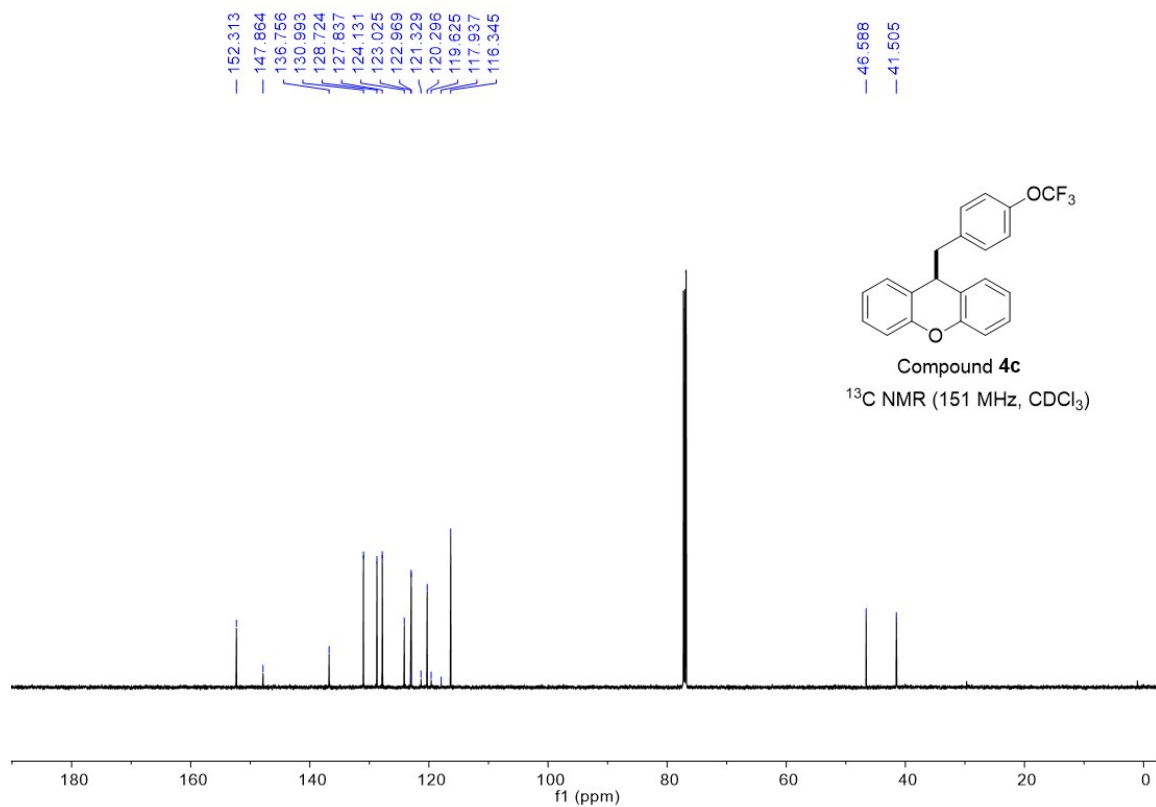

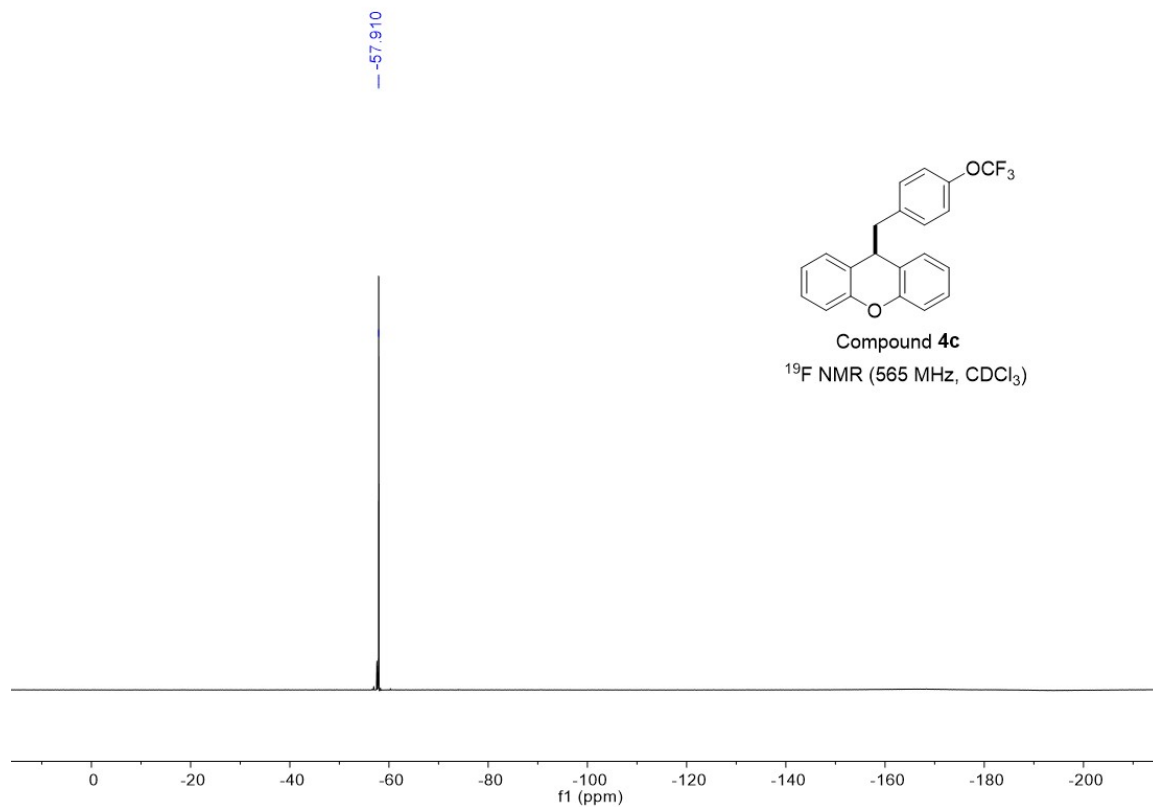

NMR spectra of methyl 4-((9H-xanthen-9-yl)methyl)benzoate (**4d**)

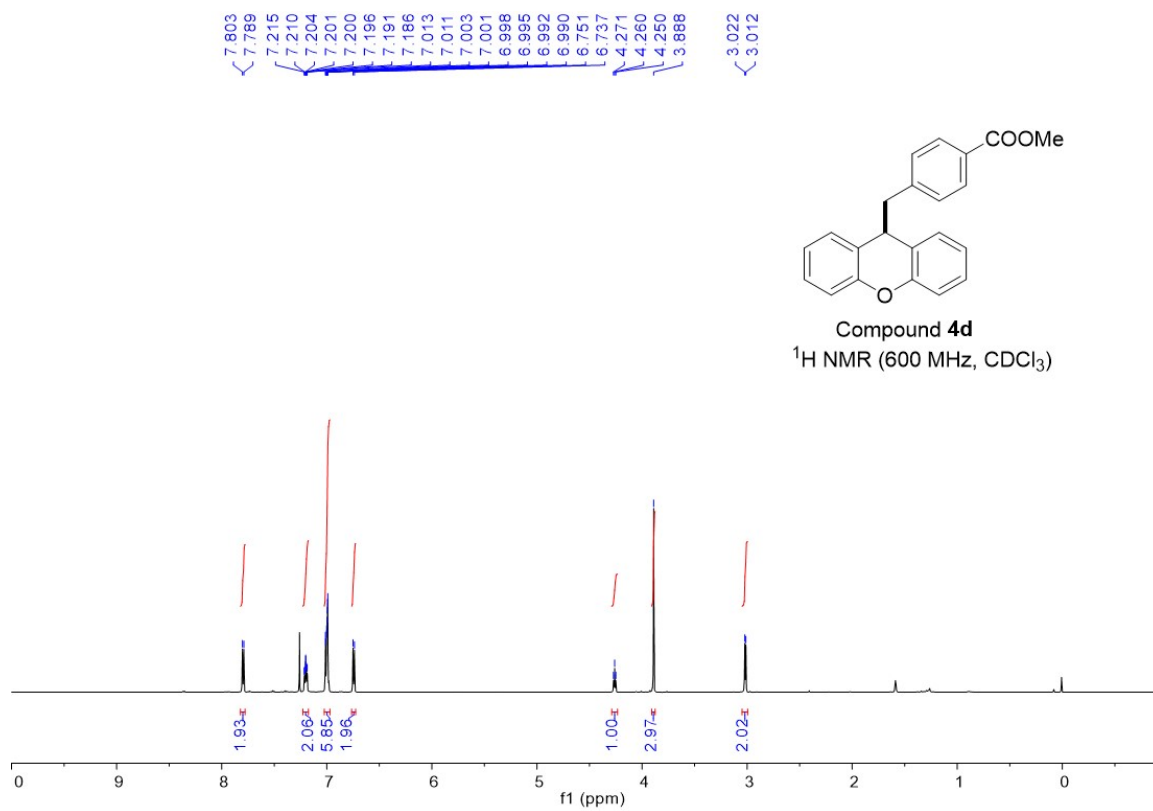

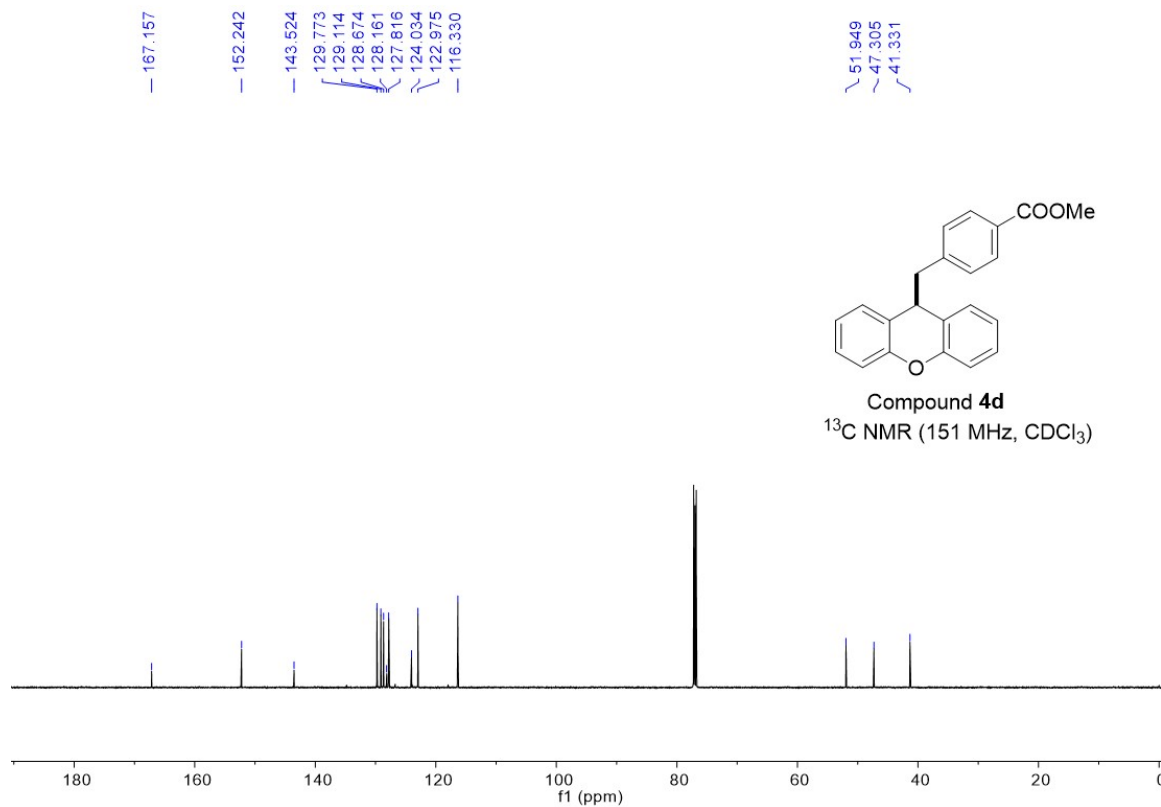

NMR spectra of 9-(3-methylbenzyl)-9*H*-xanthene (**4e**)

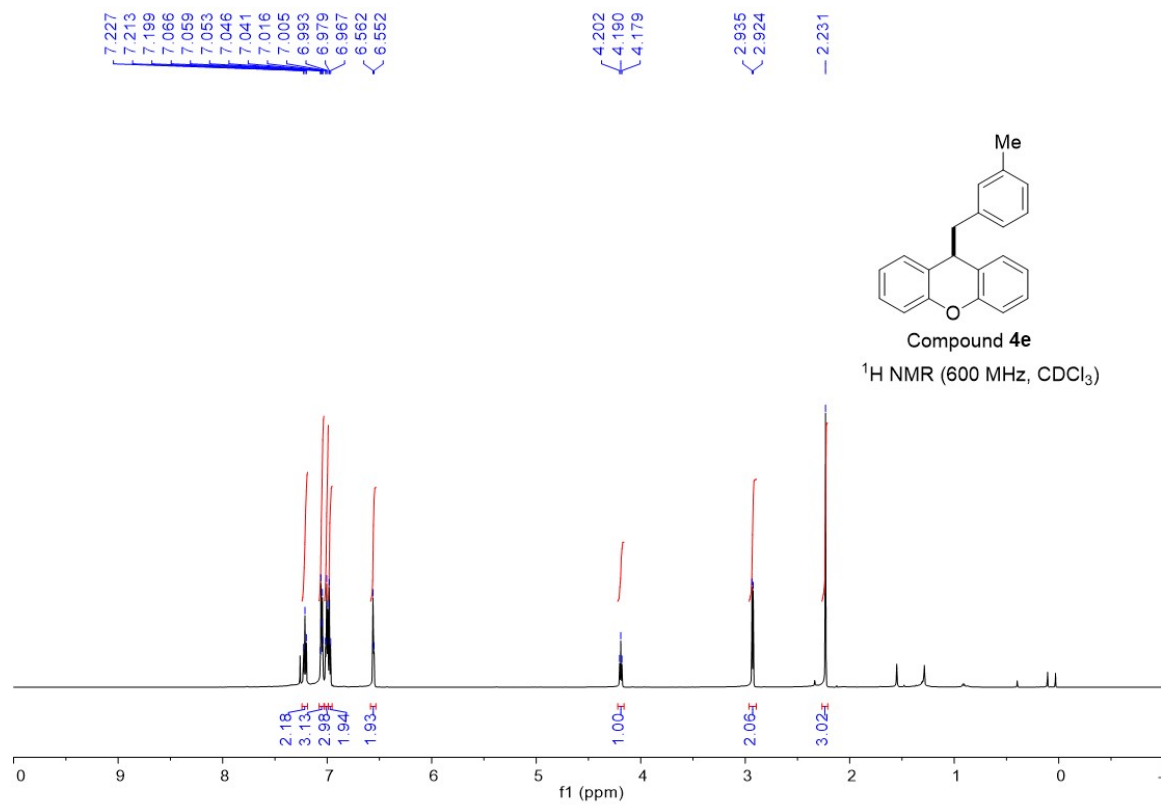

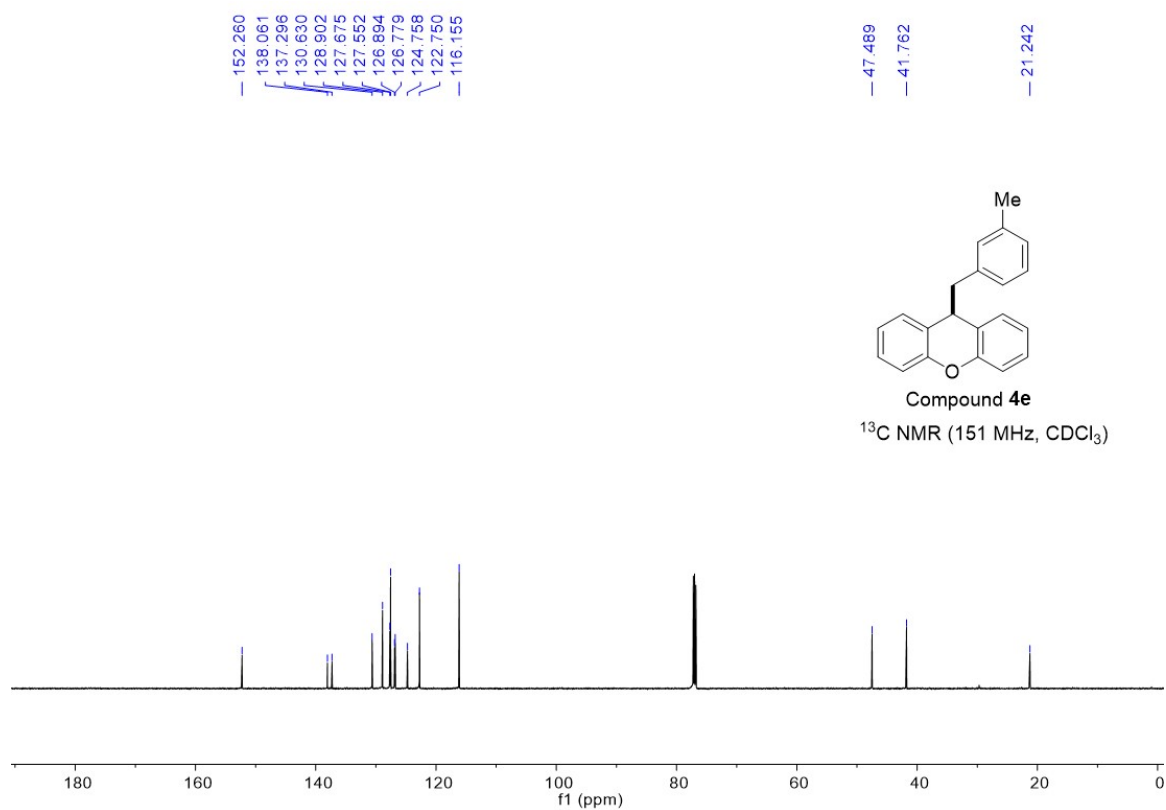

NMR spectra of 9-(2-bromobenzyl)-9H-xanthene (**4f**)

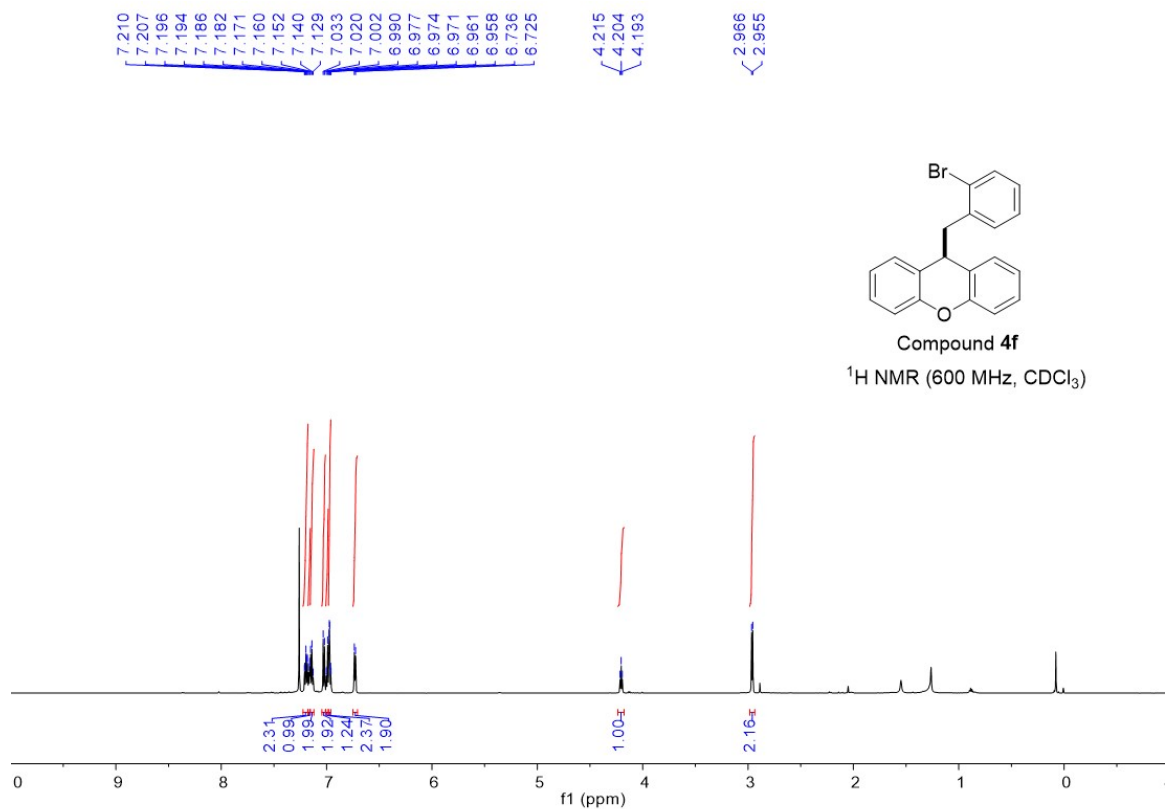



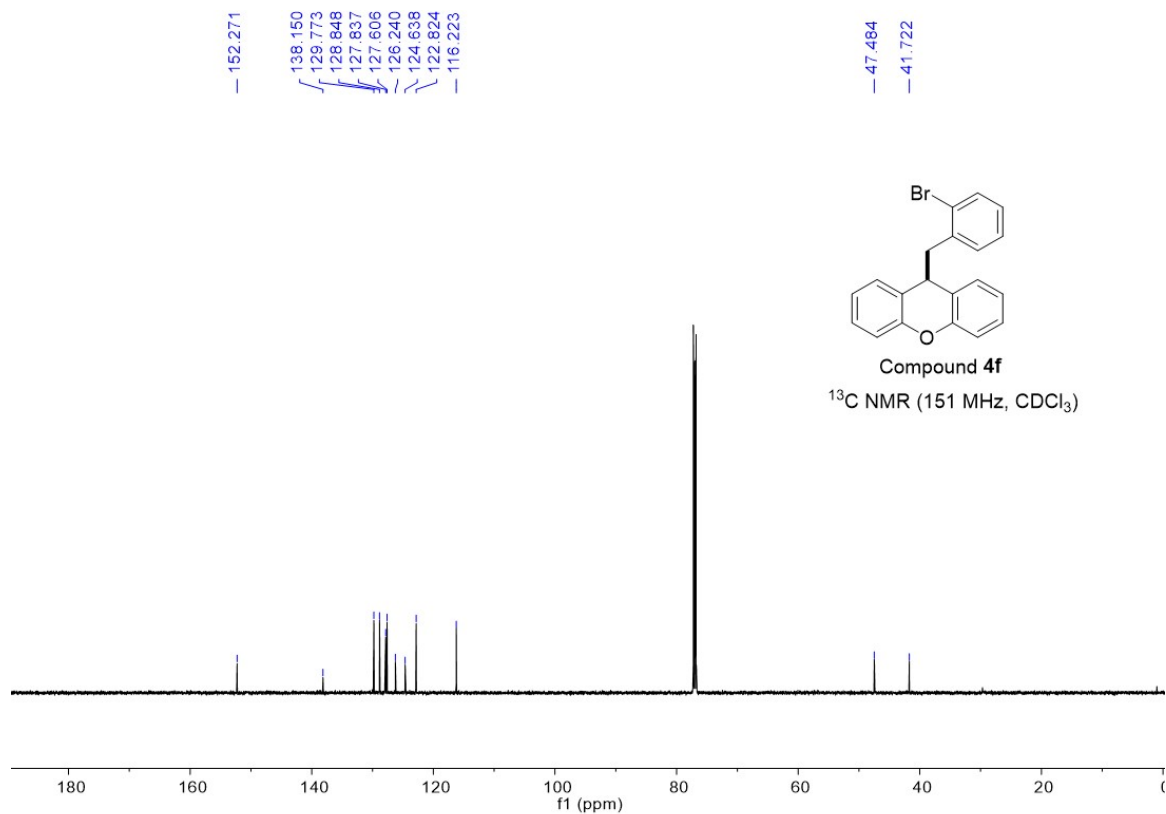

NMR spectra of 9-(3,5-dimethylbenzyl)-9*H*-xanthene (**4g**)

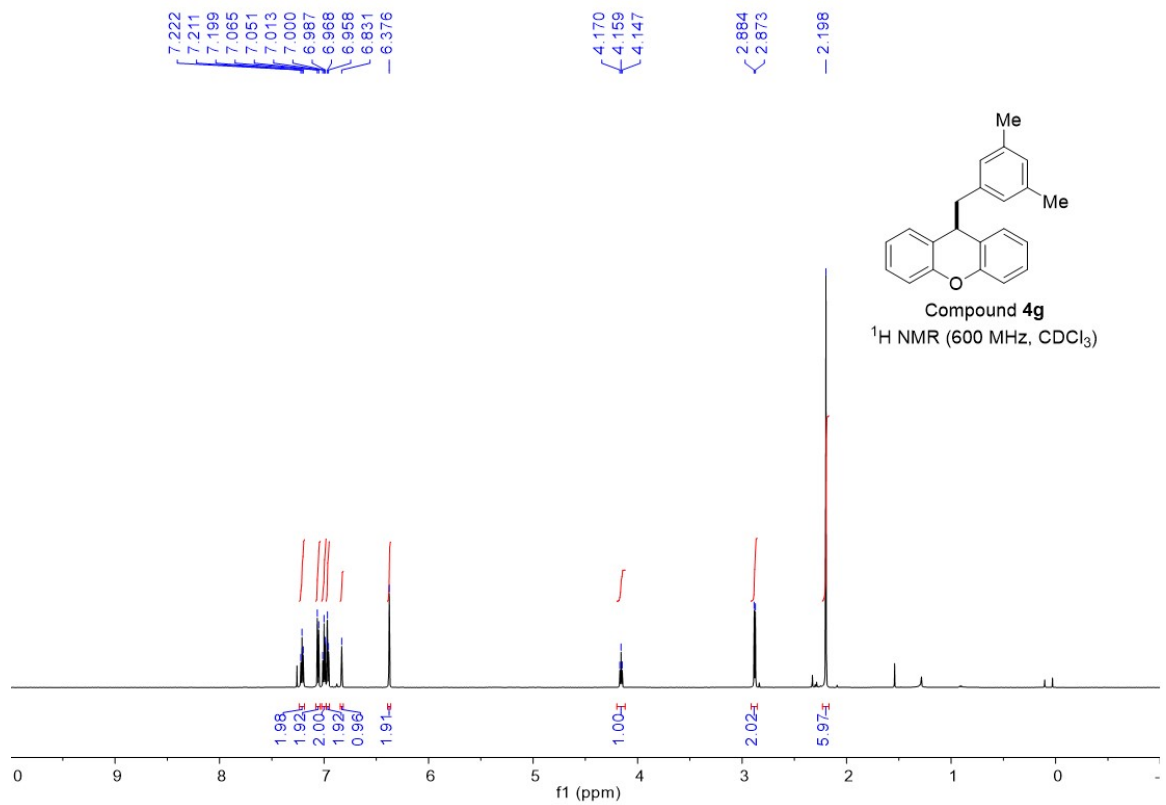

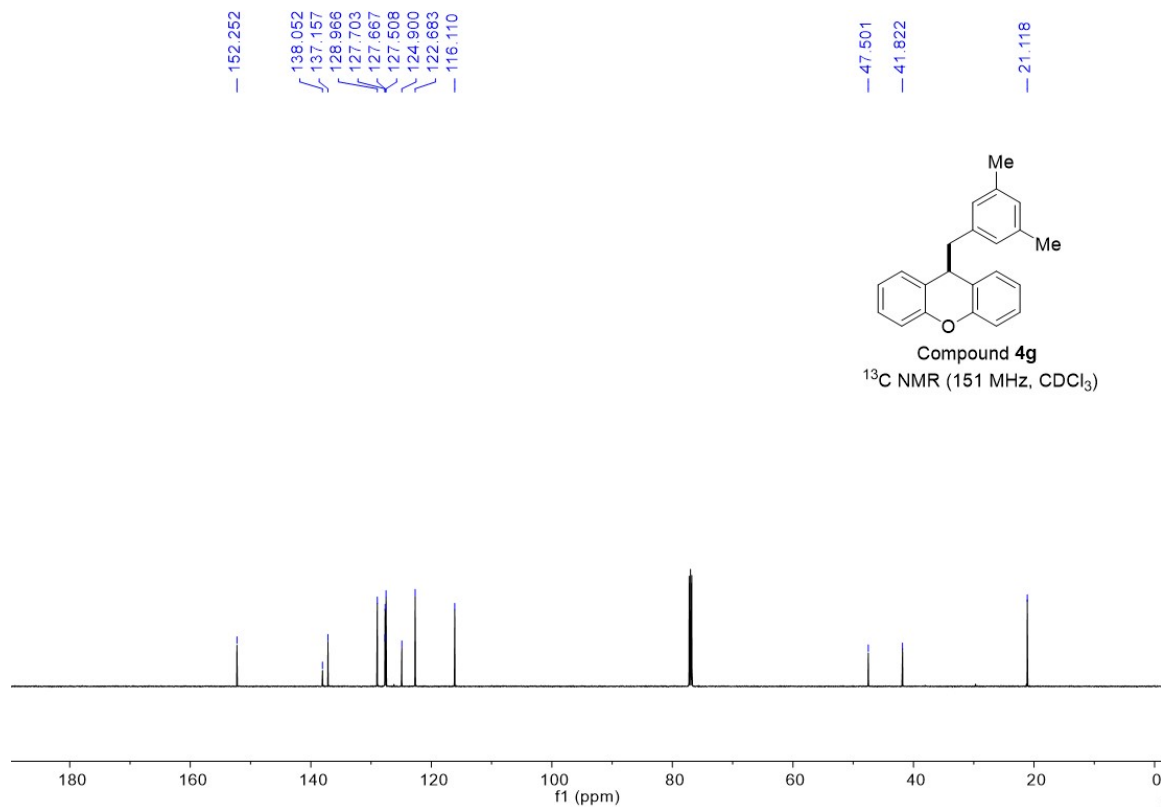

NMR spectra of 9-(3,5-dimethoxybenzyl)-9H-xanthene (**4h**)

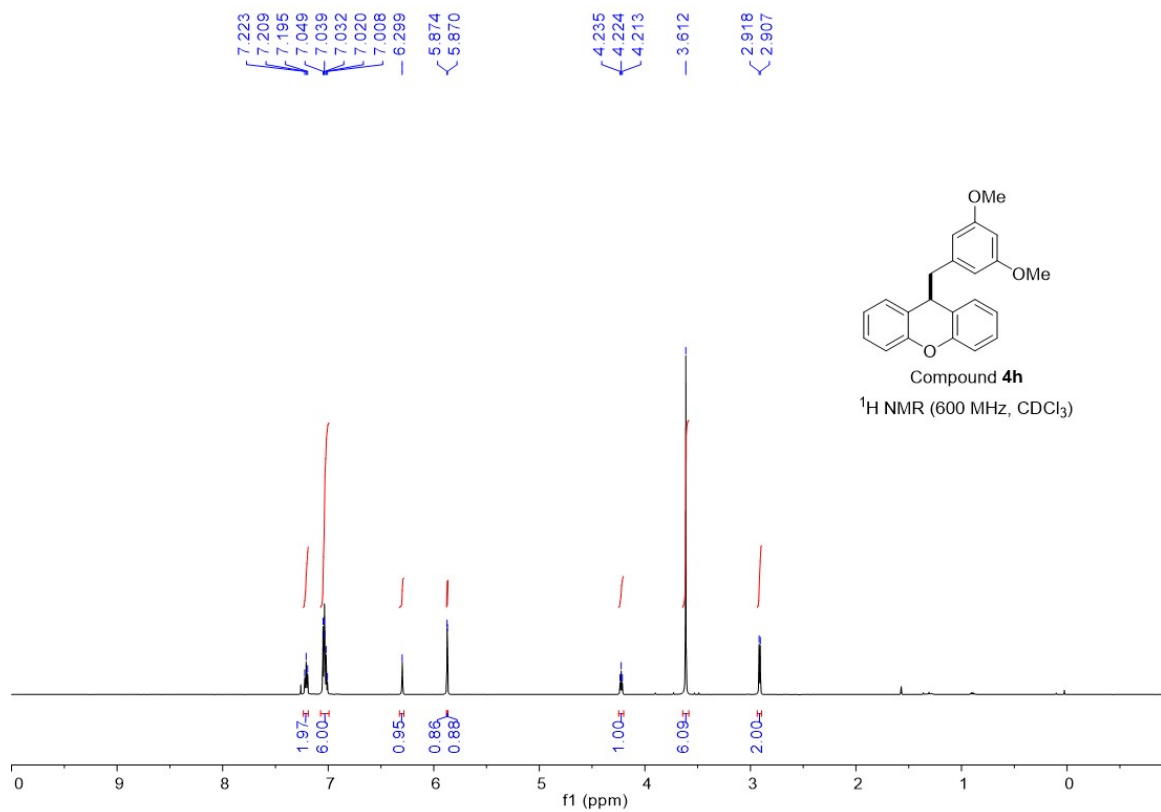

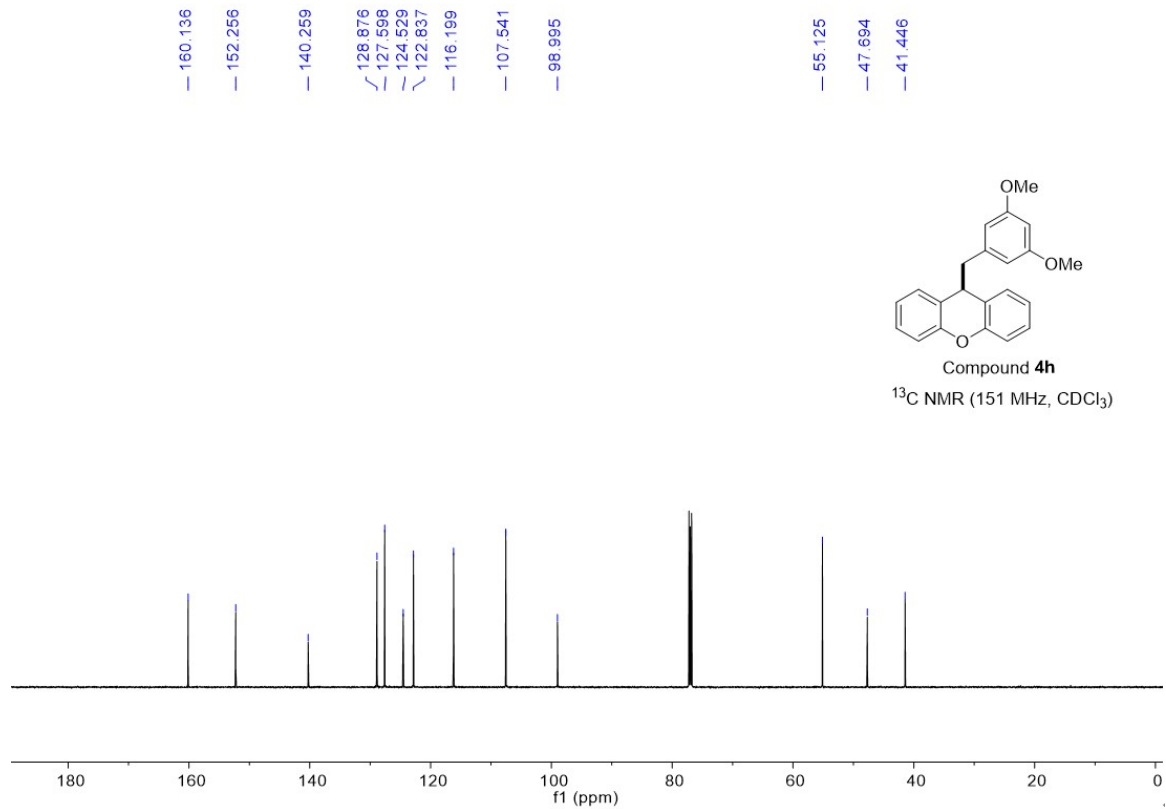

NMR spectra of 9-butyl-9H-xanthene (4i)

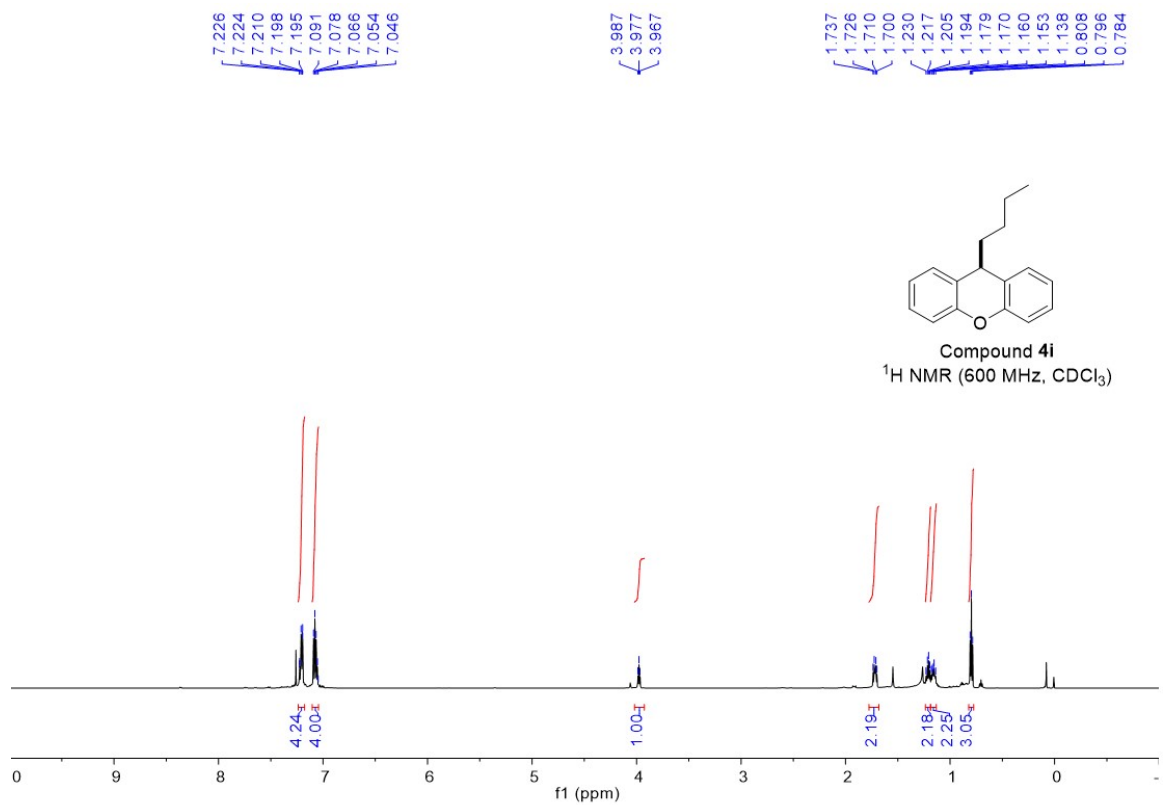

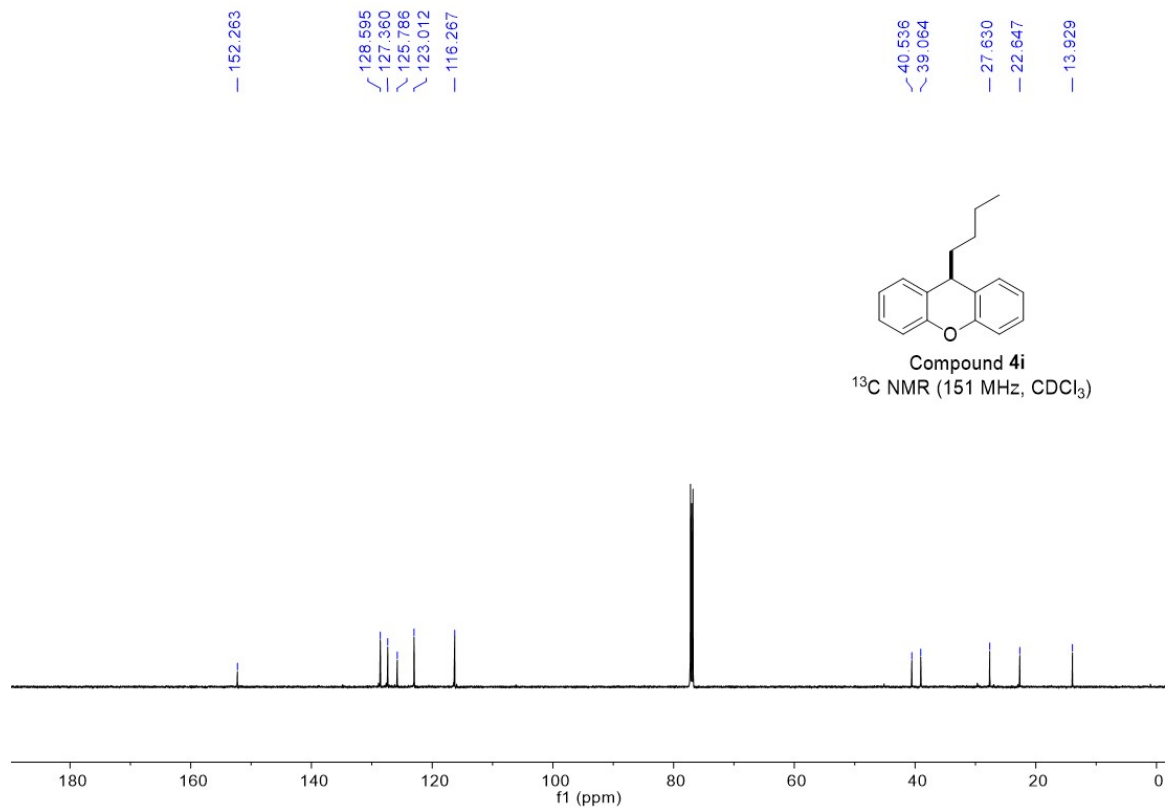

NMR spectra of 9-hexyl-9H-xanthene (**4j**)

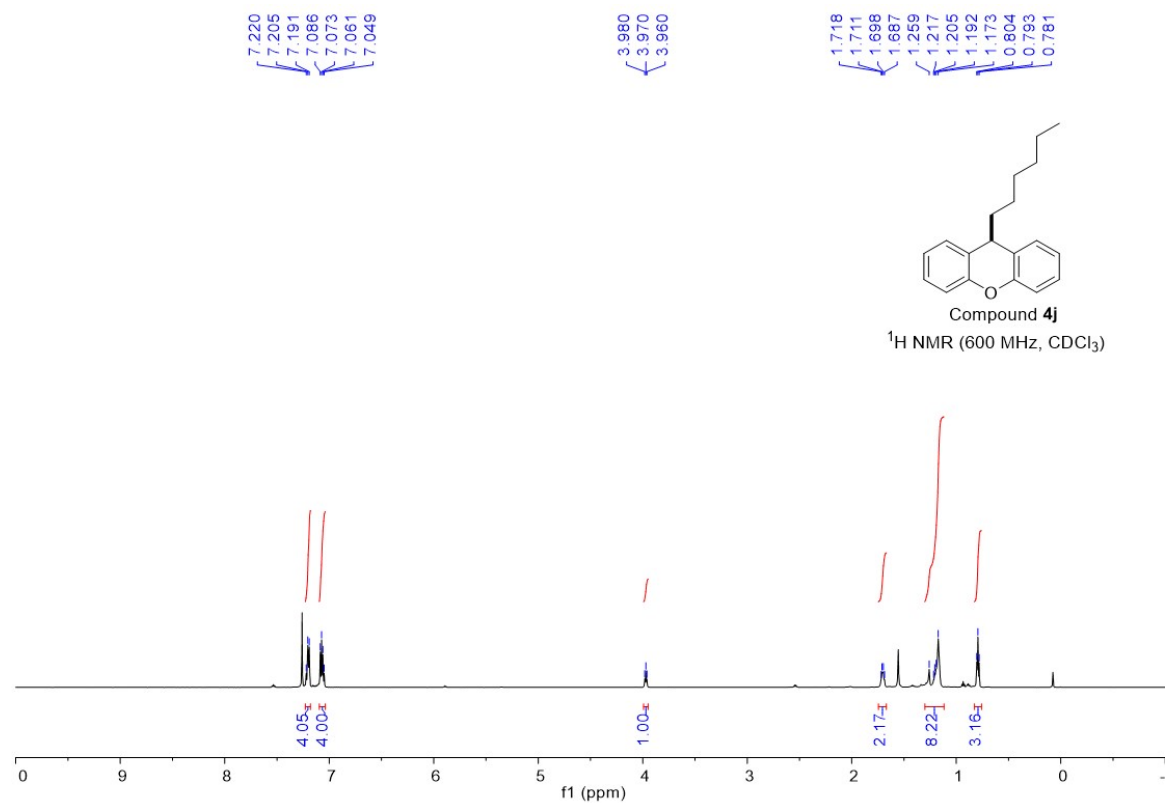

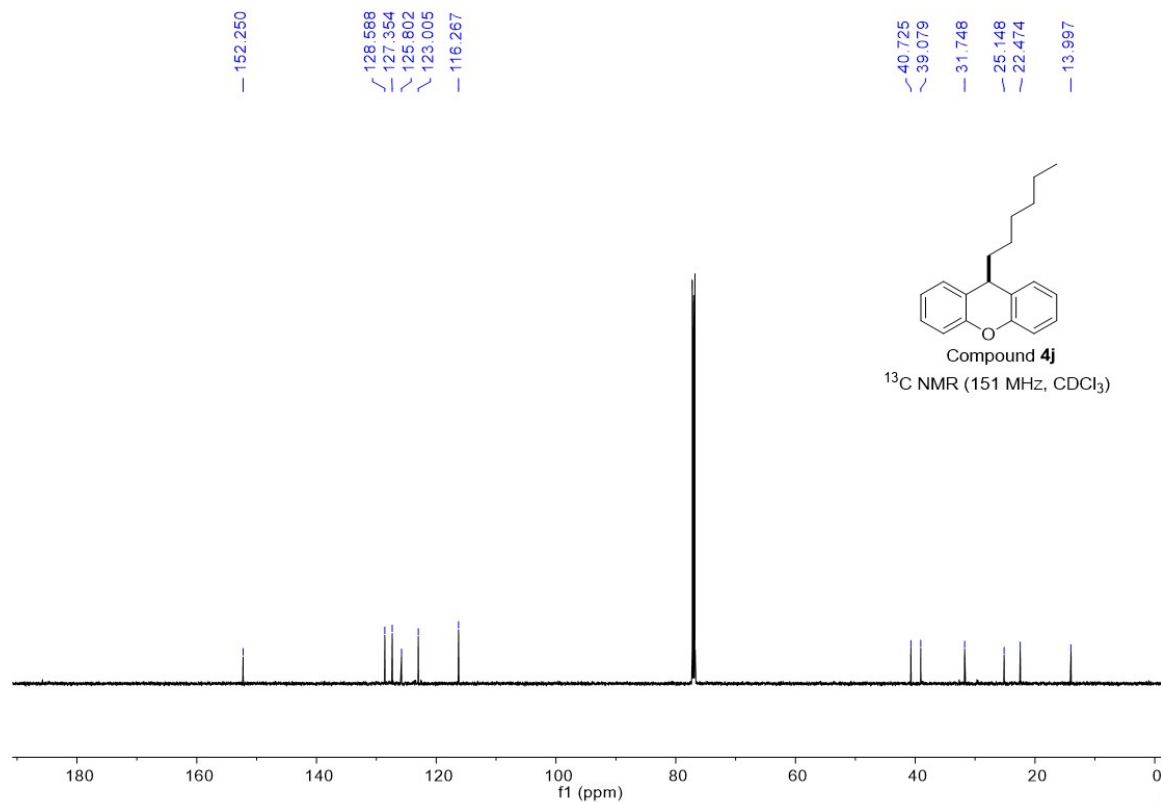

NMR spectra of 9-phenyl-9*H*-xanthene (**4k**)

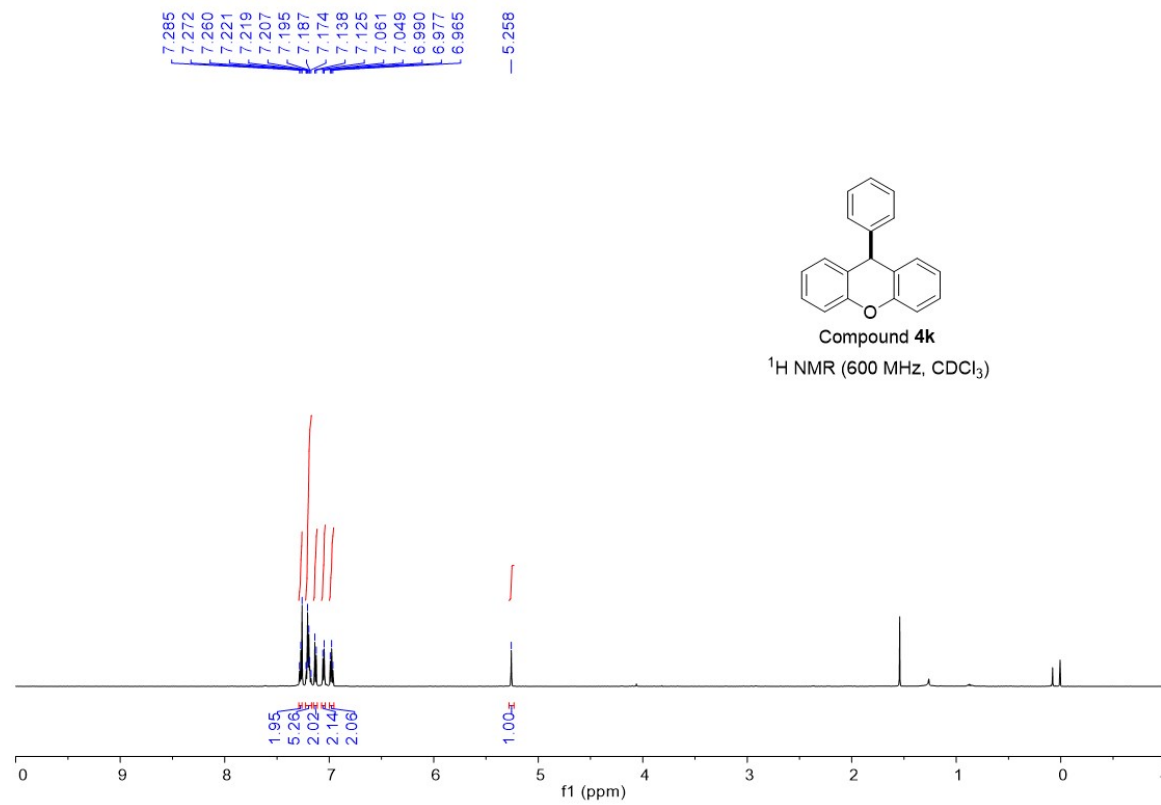

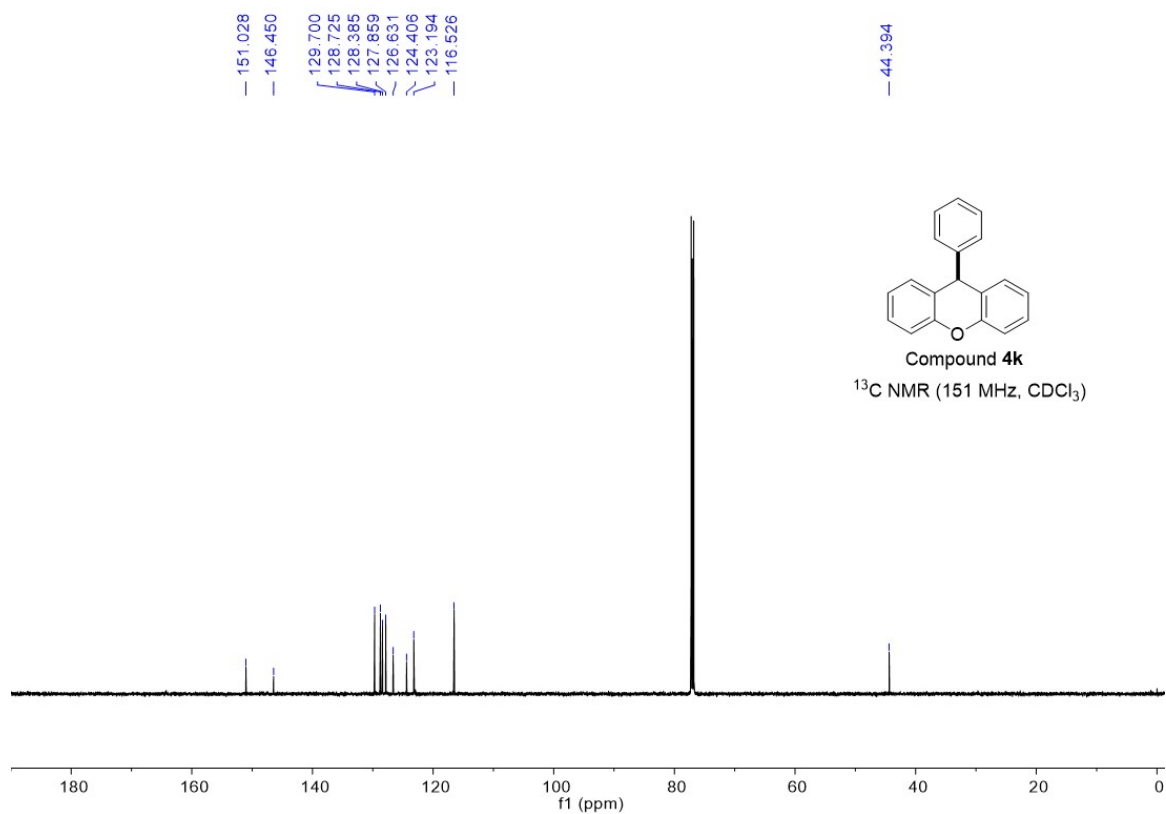

NMR spectra of 9-(*p*-tolyl)-9*H*-xanthene (**4l**)

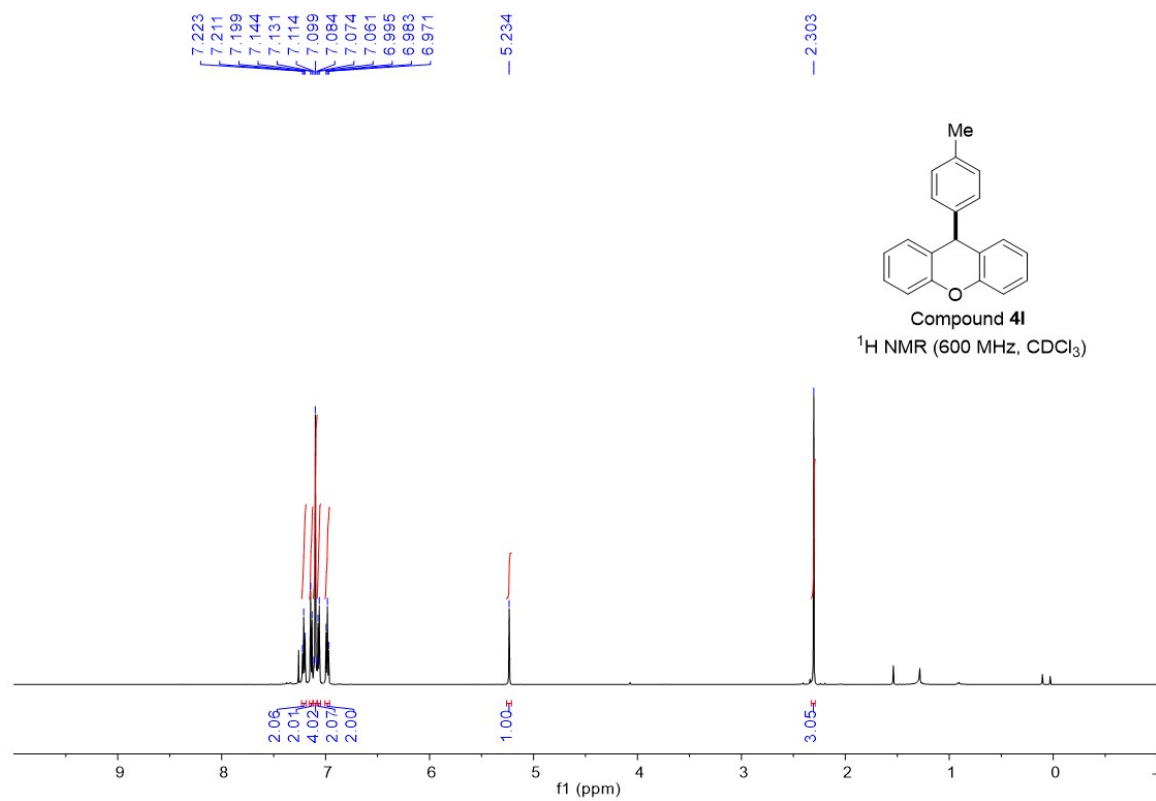

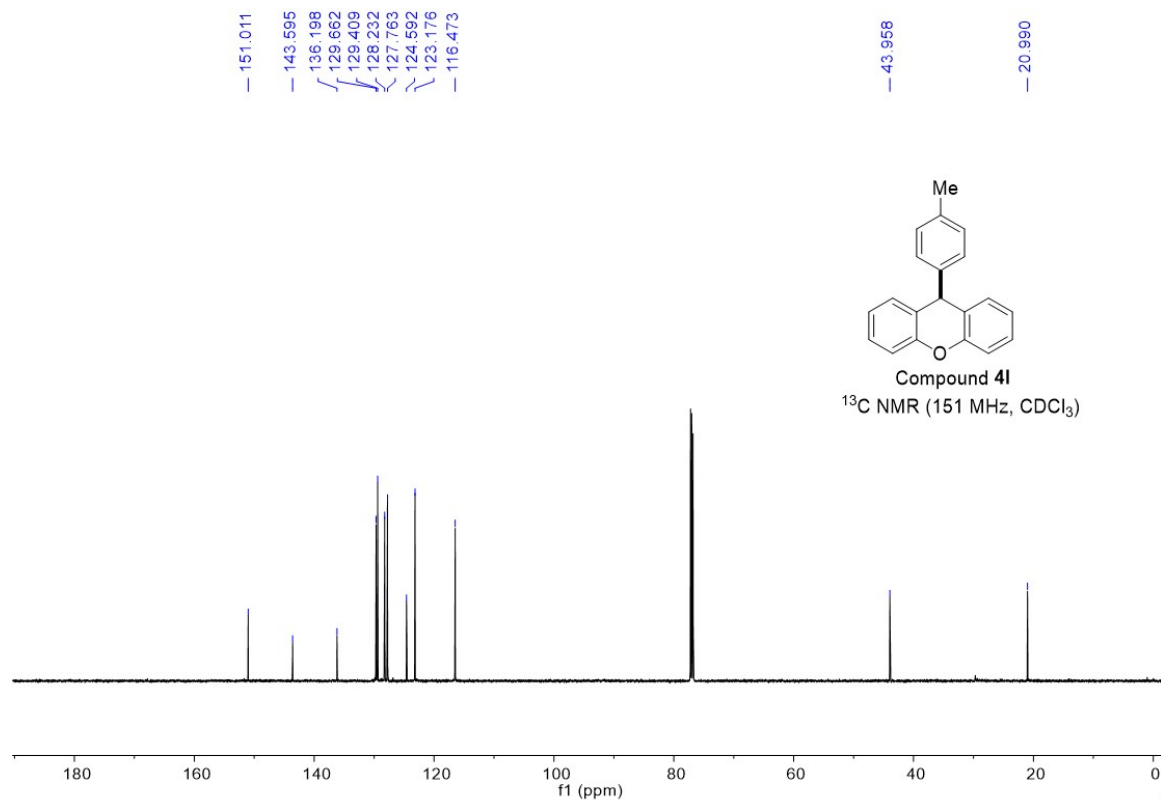

NMR spectra of 9-(4-methoxyphenyl)-9H-xanthene (**4m**)

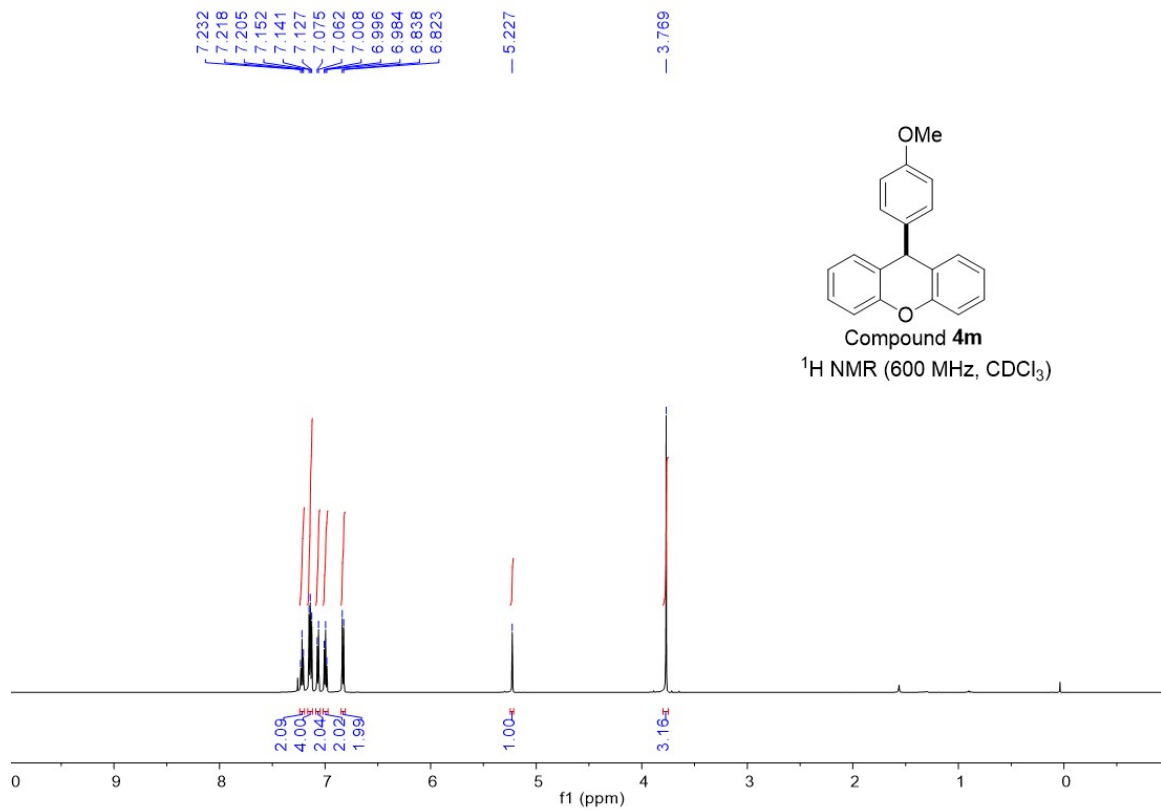

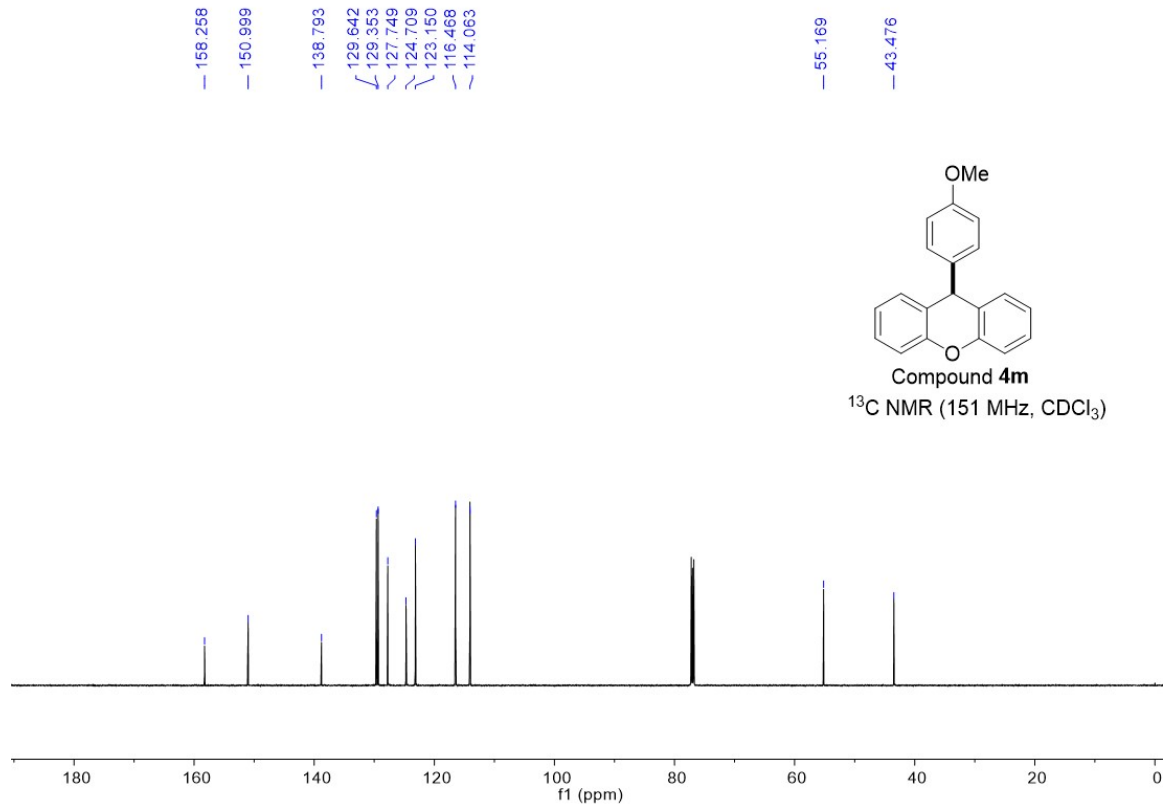

NMR spectra of 9-(4-ethoxyphenyl)-9*H*-xanthene (**4n**)

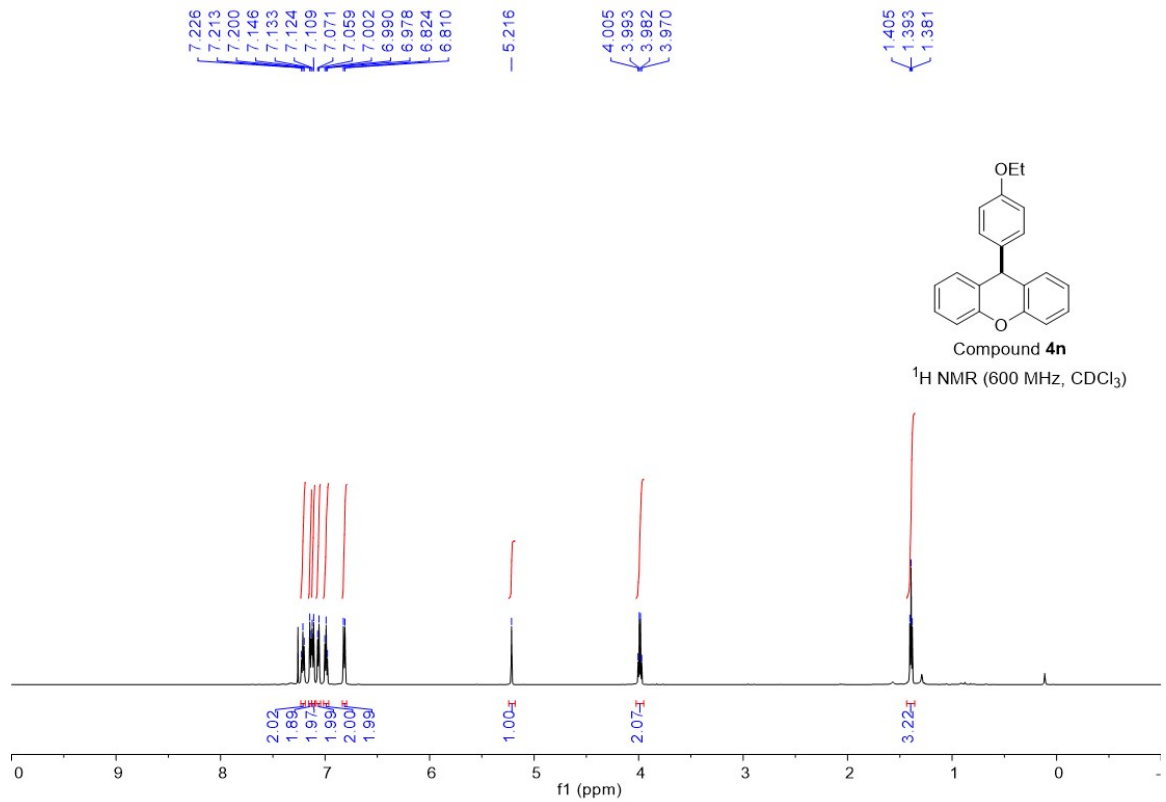



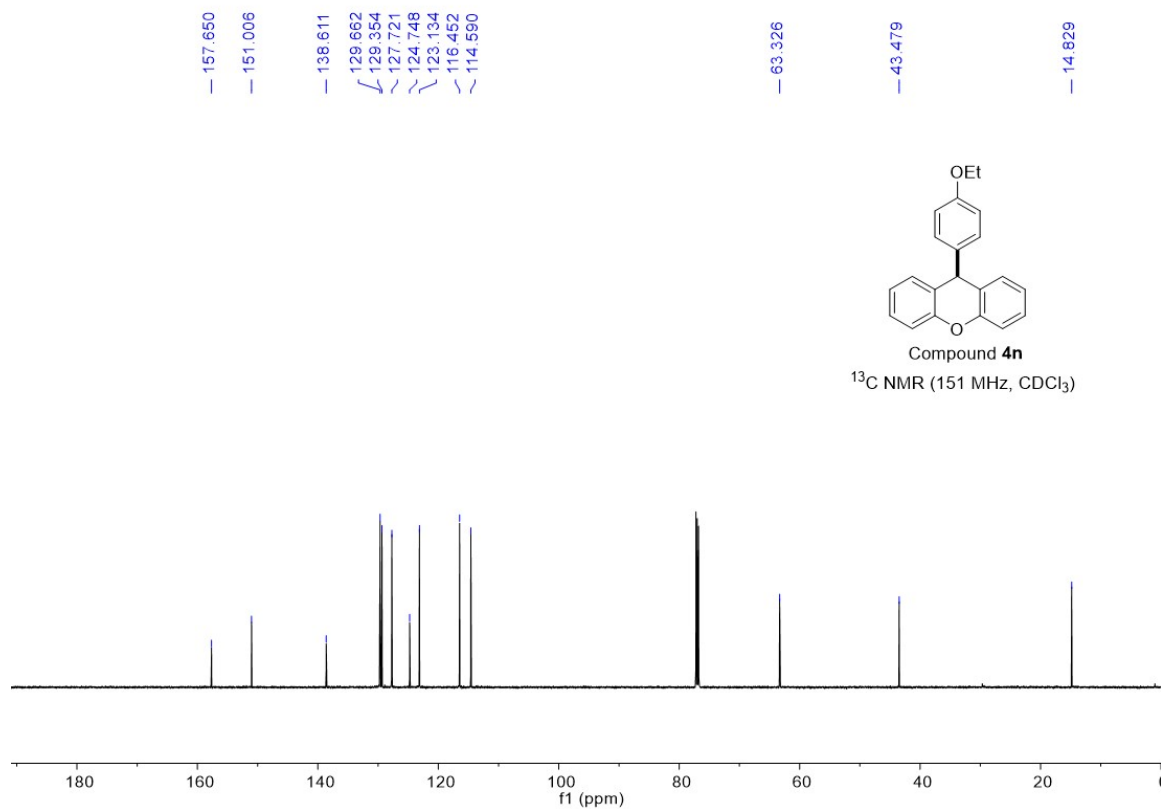

NMR spectra of 9-(2-methoxyphenyl)-9*H*-xanthene (**4o**)

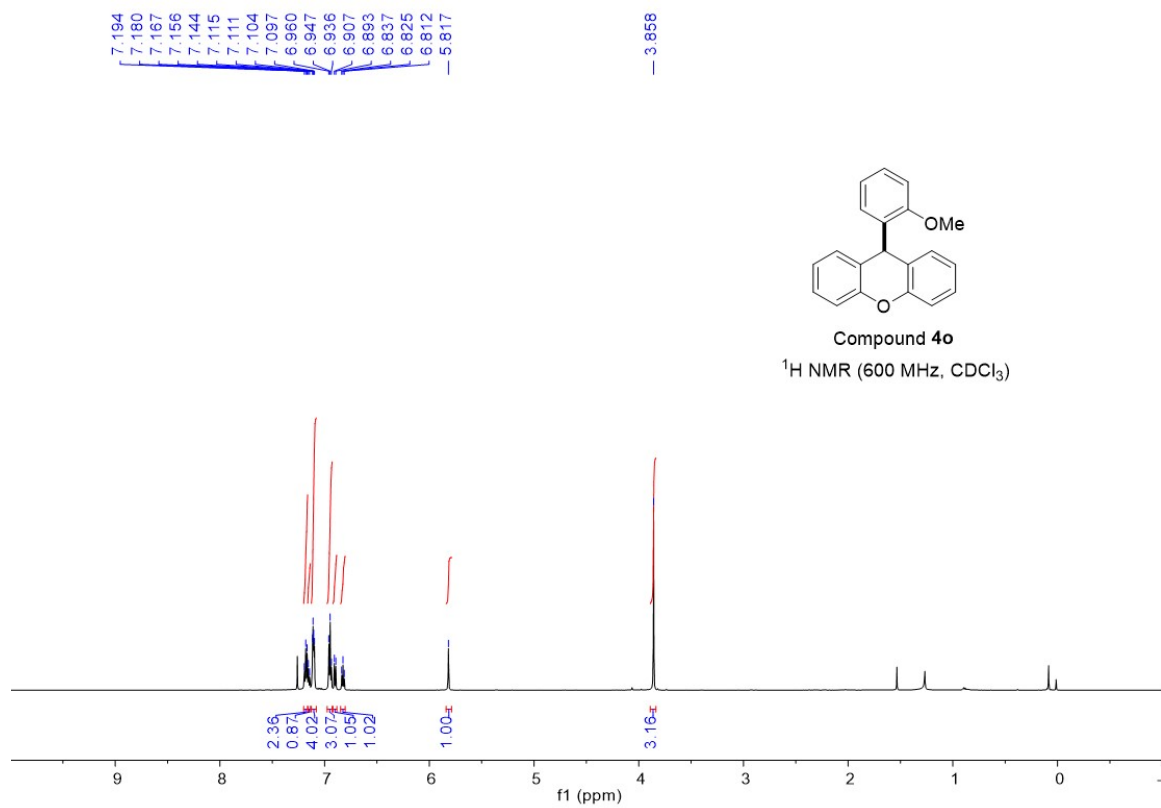

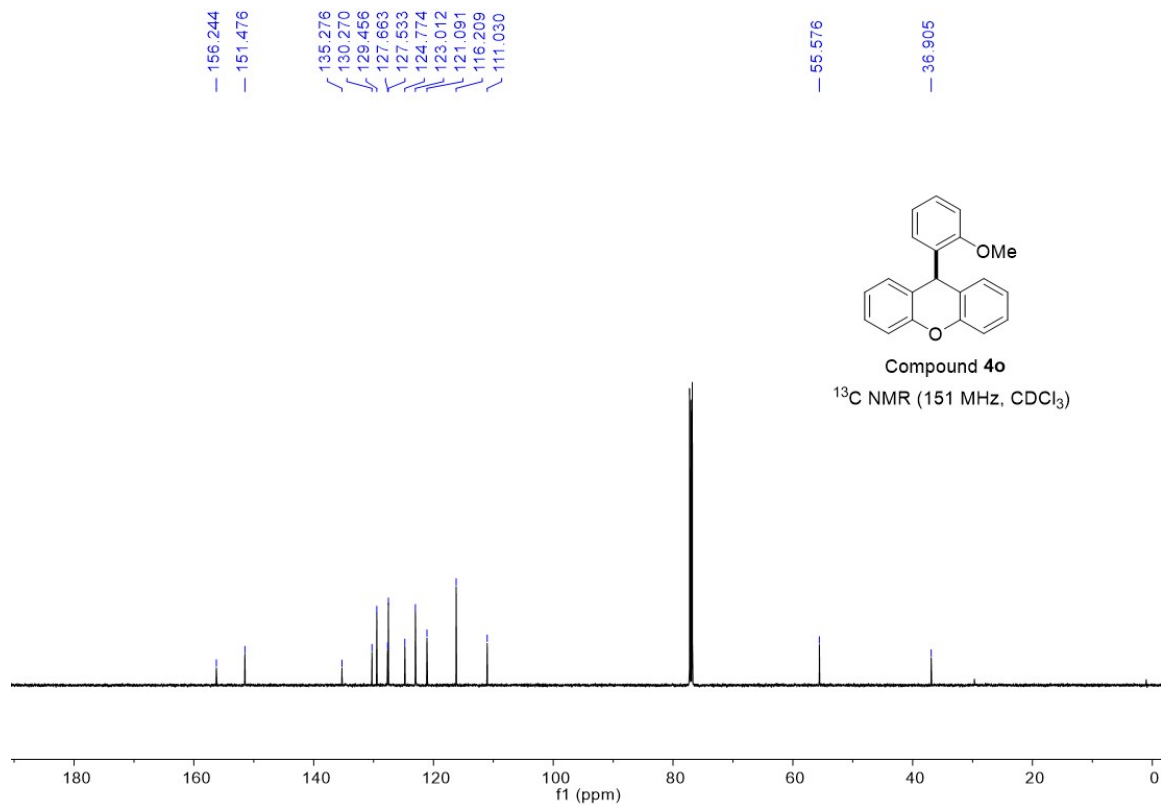

NMR spectra of 9-(naphthalen-2-yl)-9H-xanthene (**4p**)

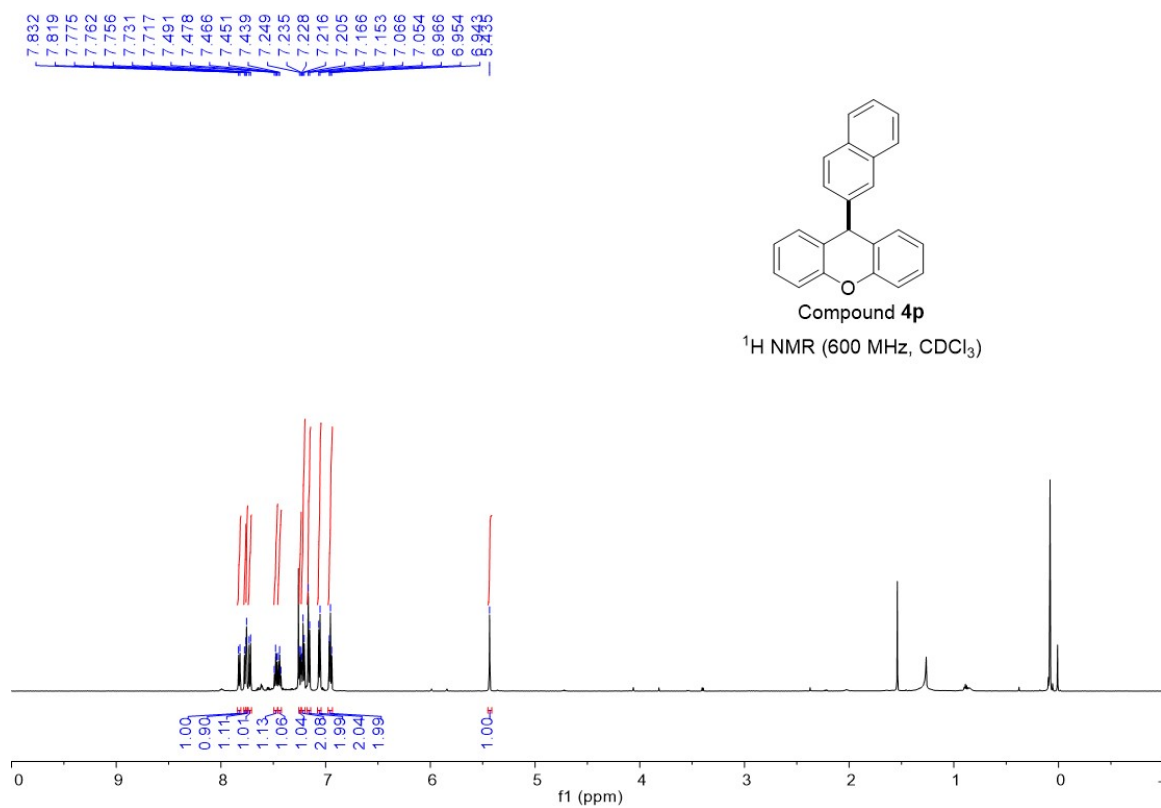

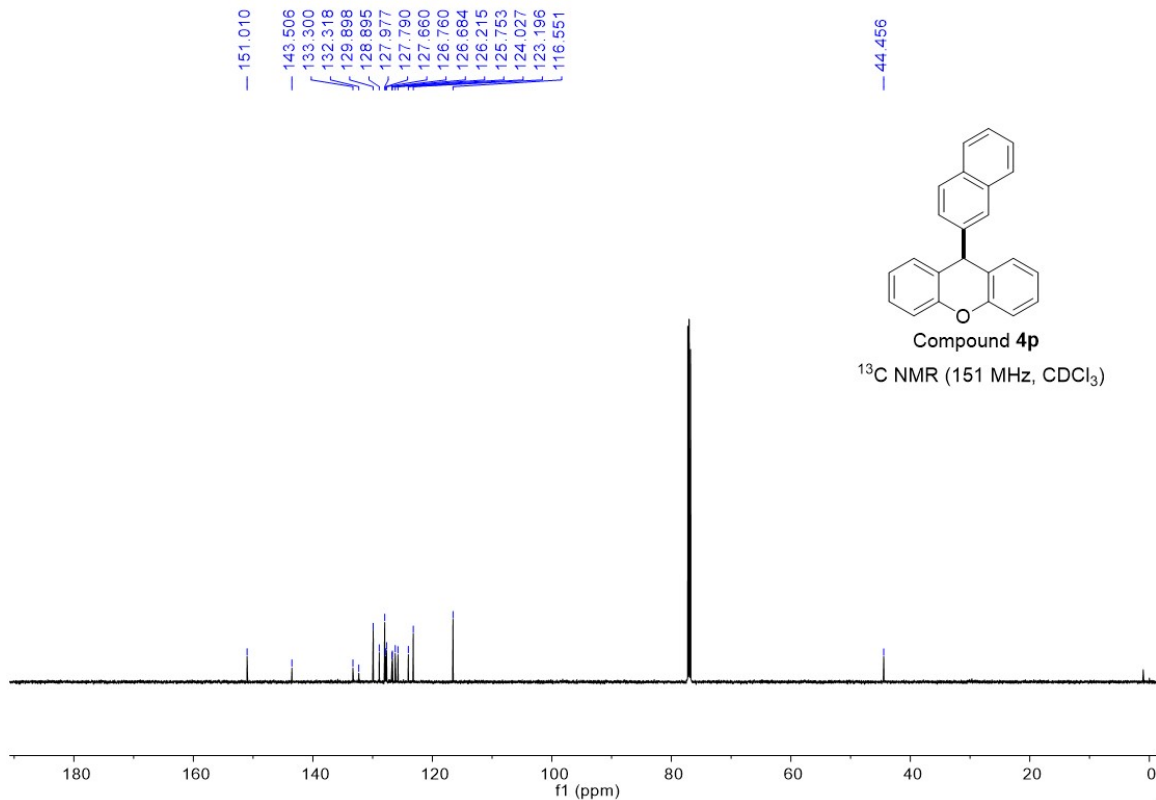

NMR spectra of 9-(benzofuran-2-yl)-9H-xanthene (**4q**)

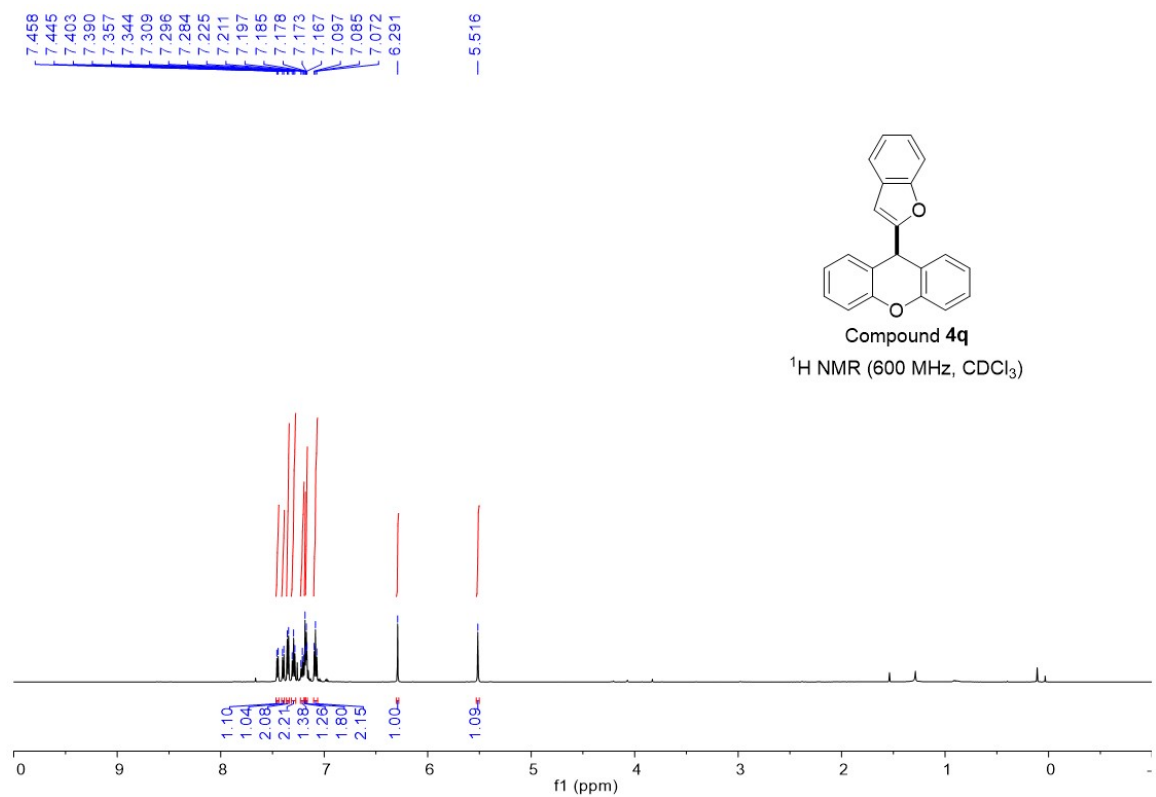

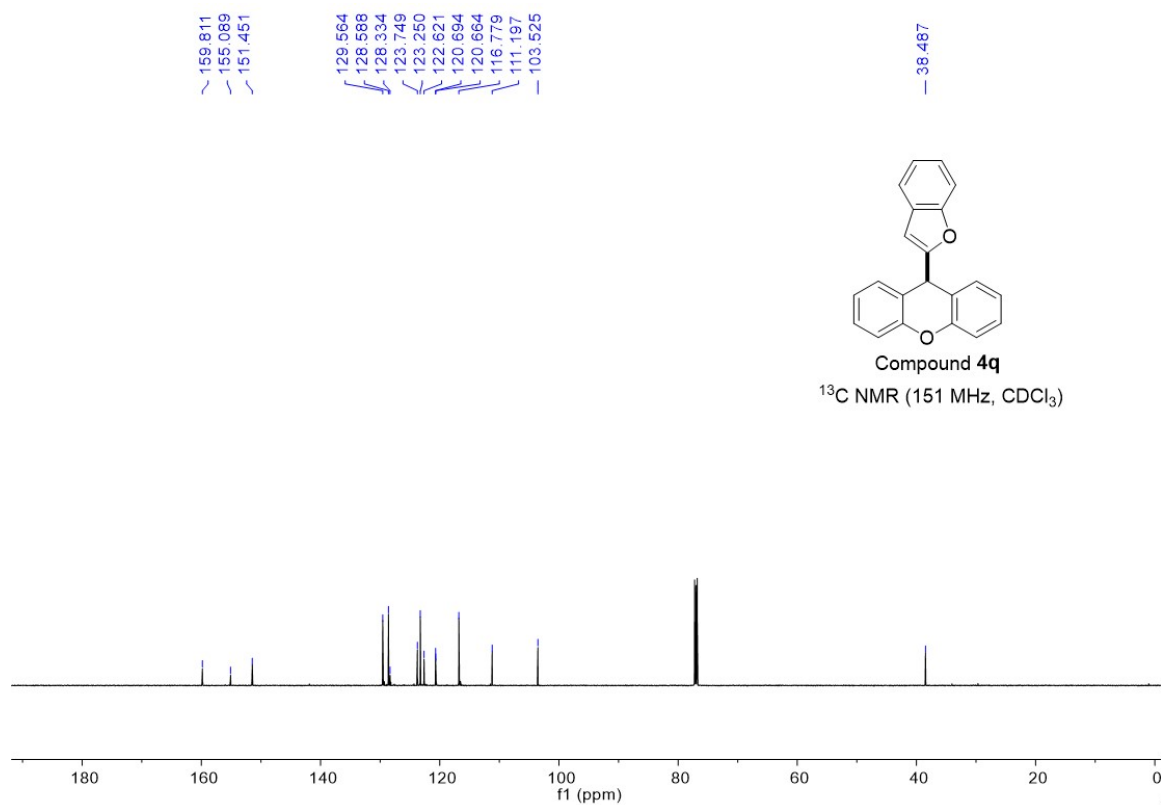

NMR spectra of 9-(benzo[*b*]thiophen-2-yl)-9*H*-xanthene (**4r**)

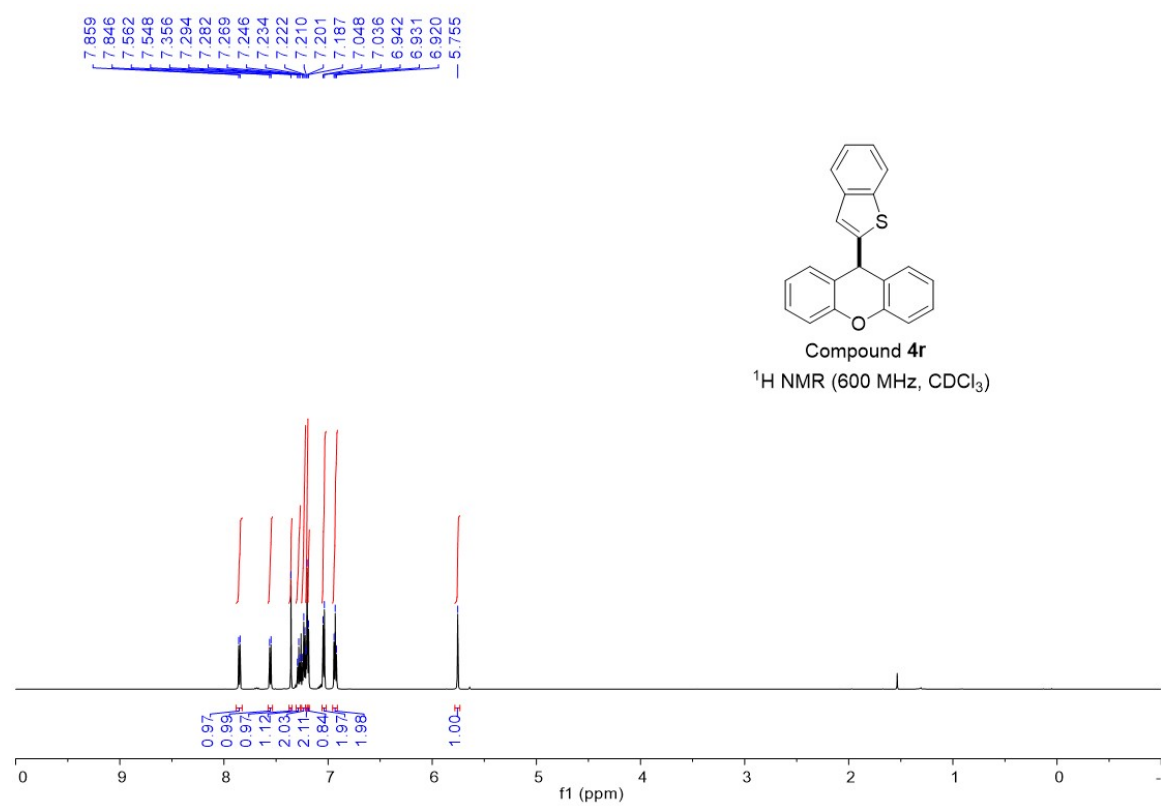

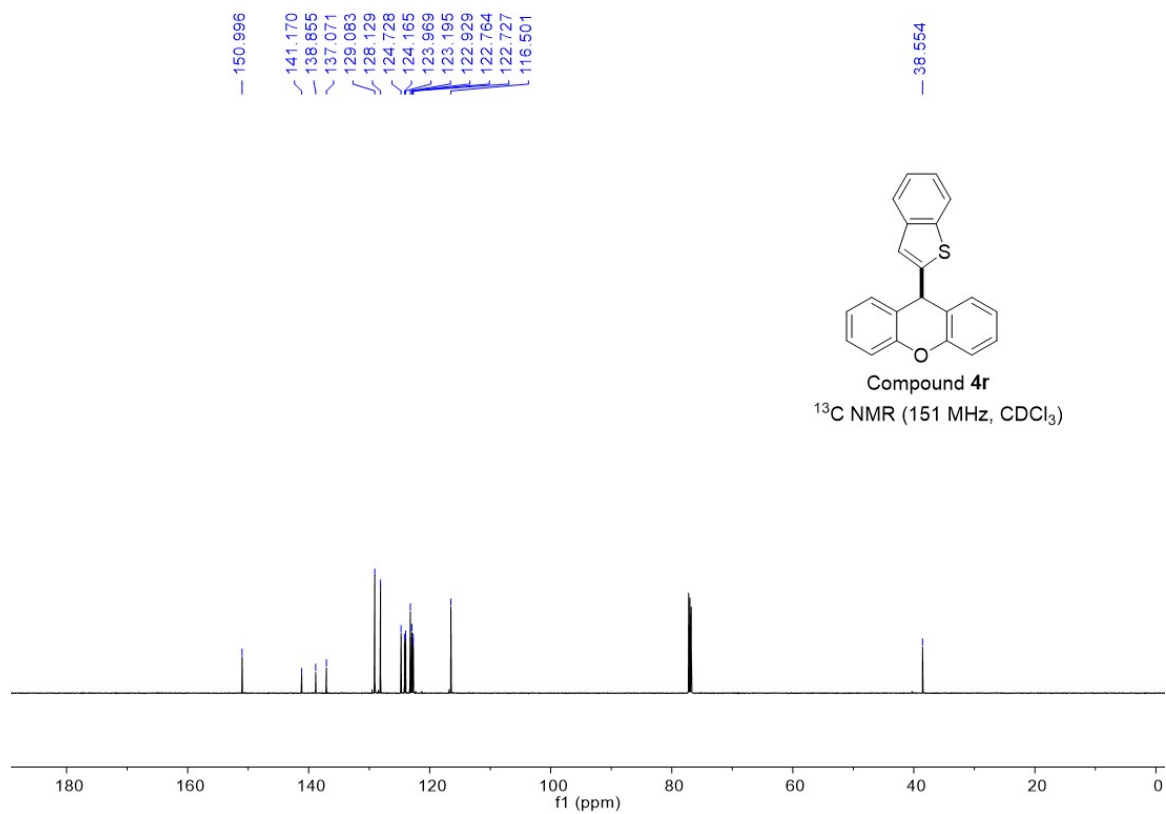

NMR spectra of 9-(thiophen-3-yl)-9H-xanthene (**4s**)

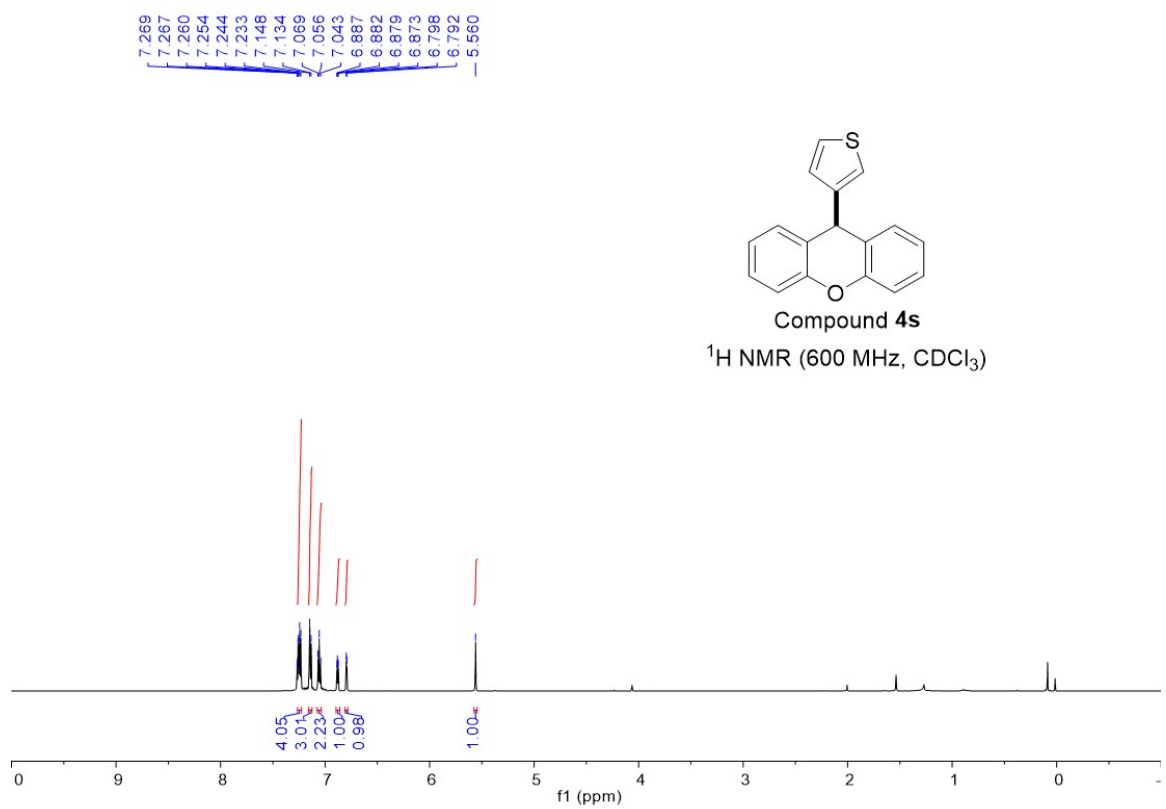

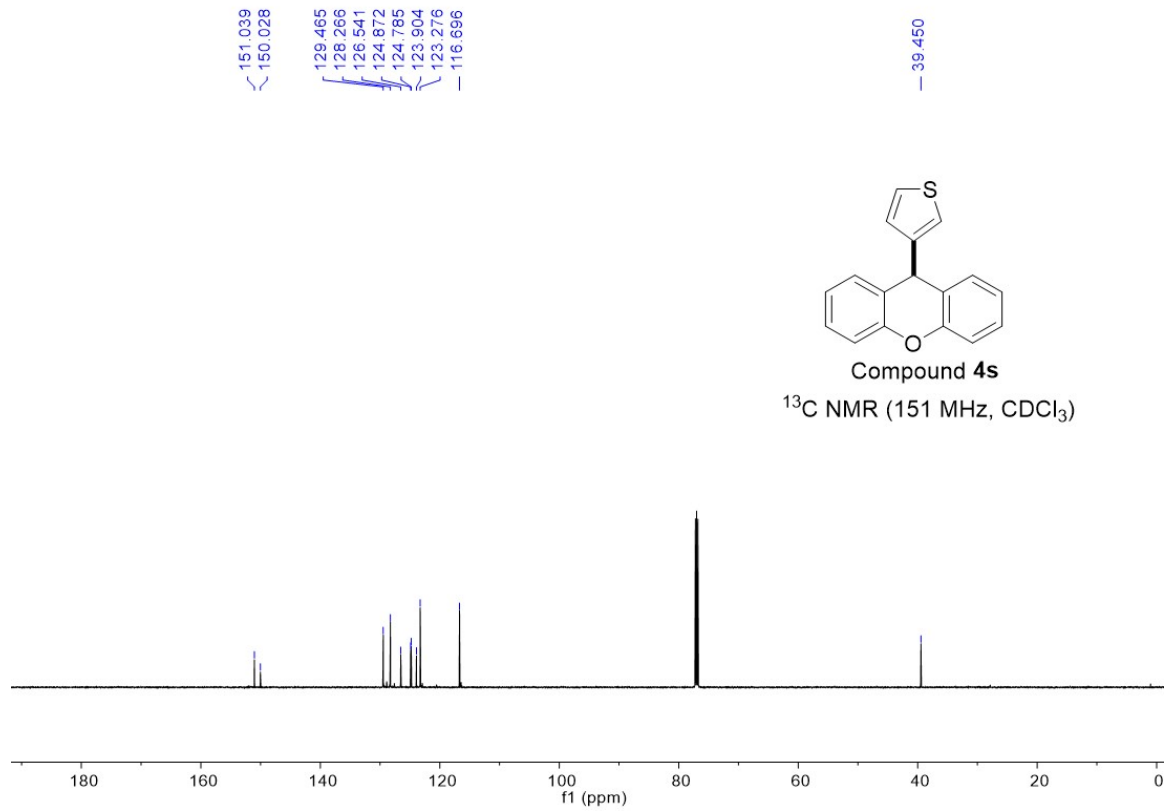

NMR spectra of methyl 1-methoxy-4-(4-phenylbut-3-yn-2-yl)benzene (**7a**)

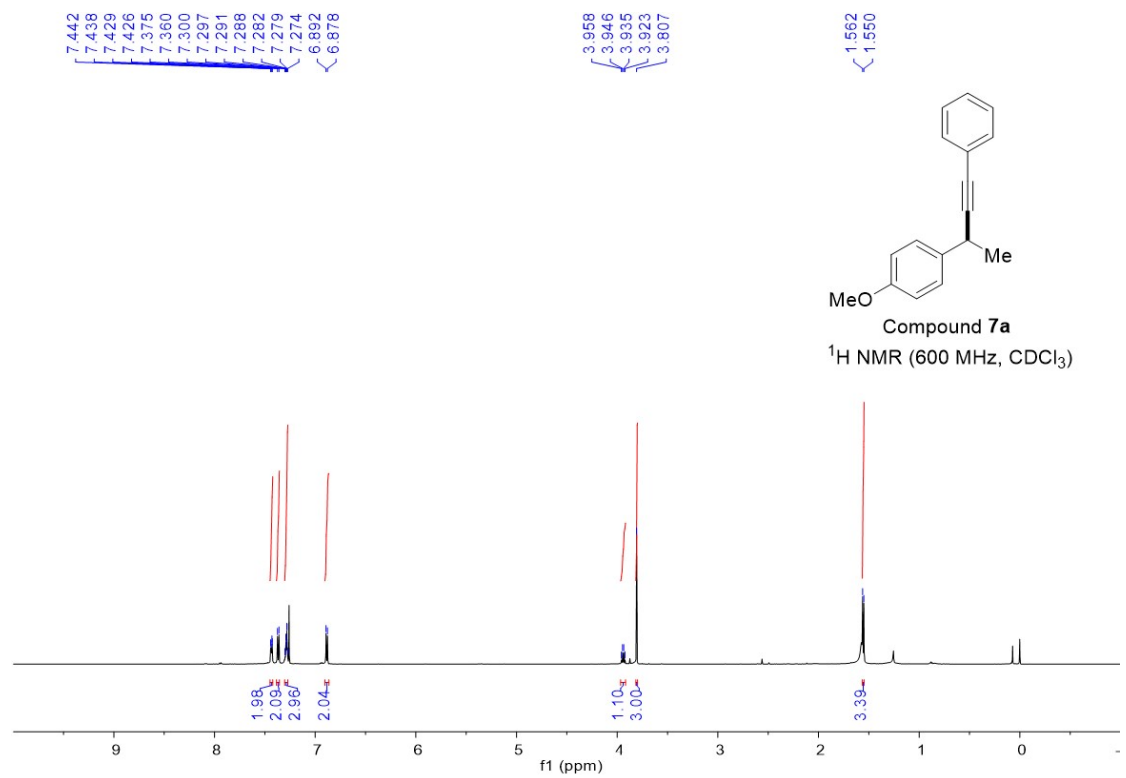

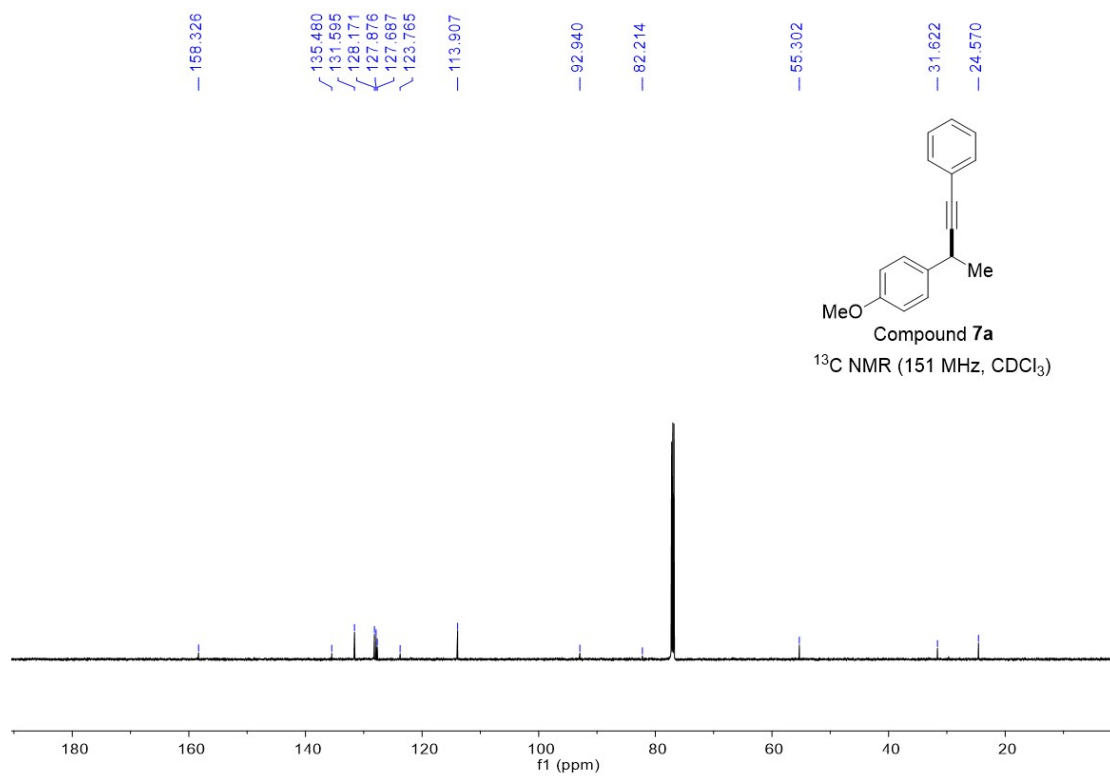

NMR spectra of methyl 1-methoxy-4-(1-phenylpent-1-yn-3-yl)benzene (**7b**)

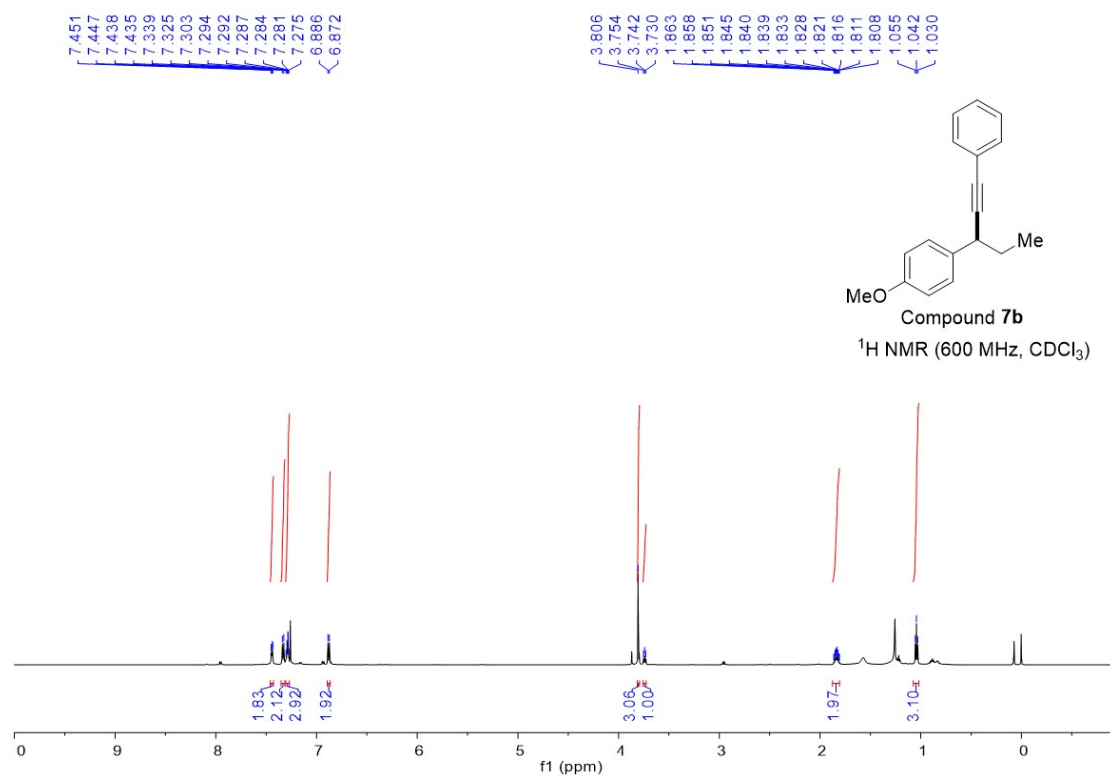

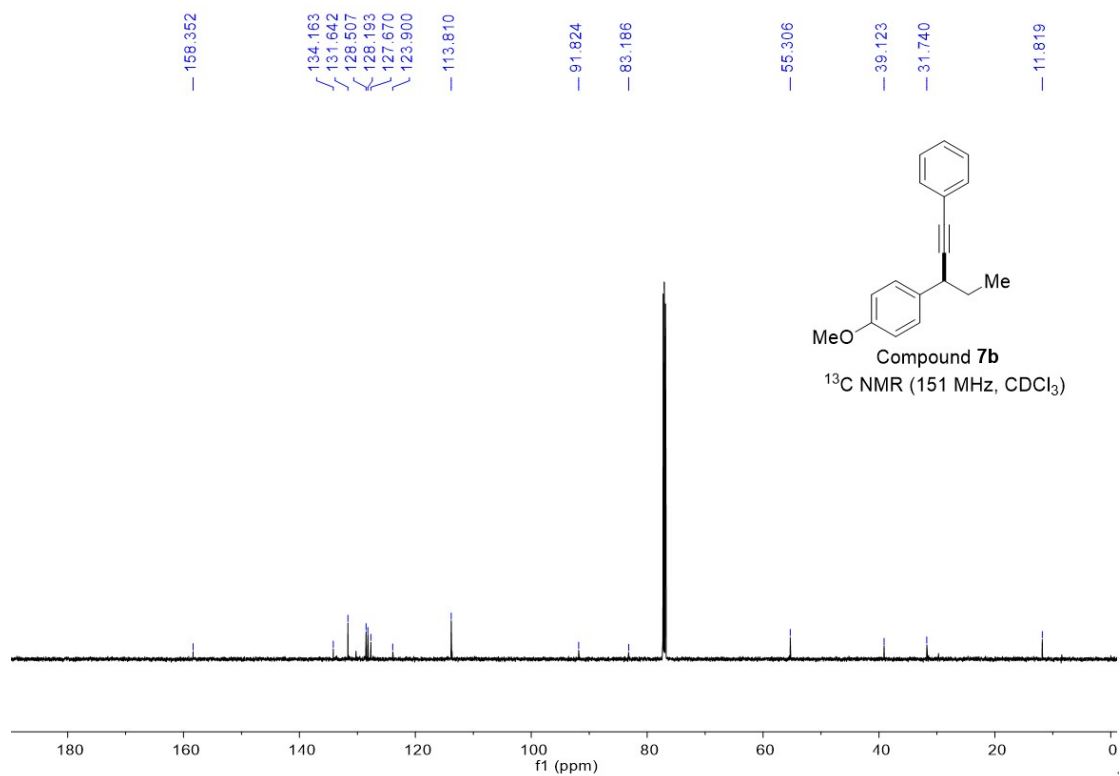

NMR spectra of Methyl 4-(((2,2,5,5-tetramethylpyrrolidin-1-yl)oxy)methyl)benzoate

(8)

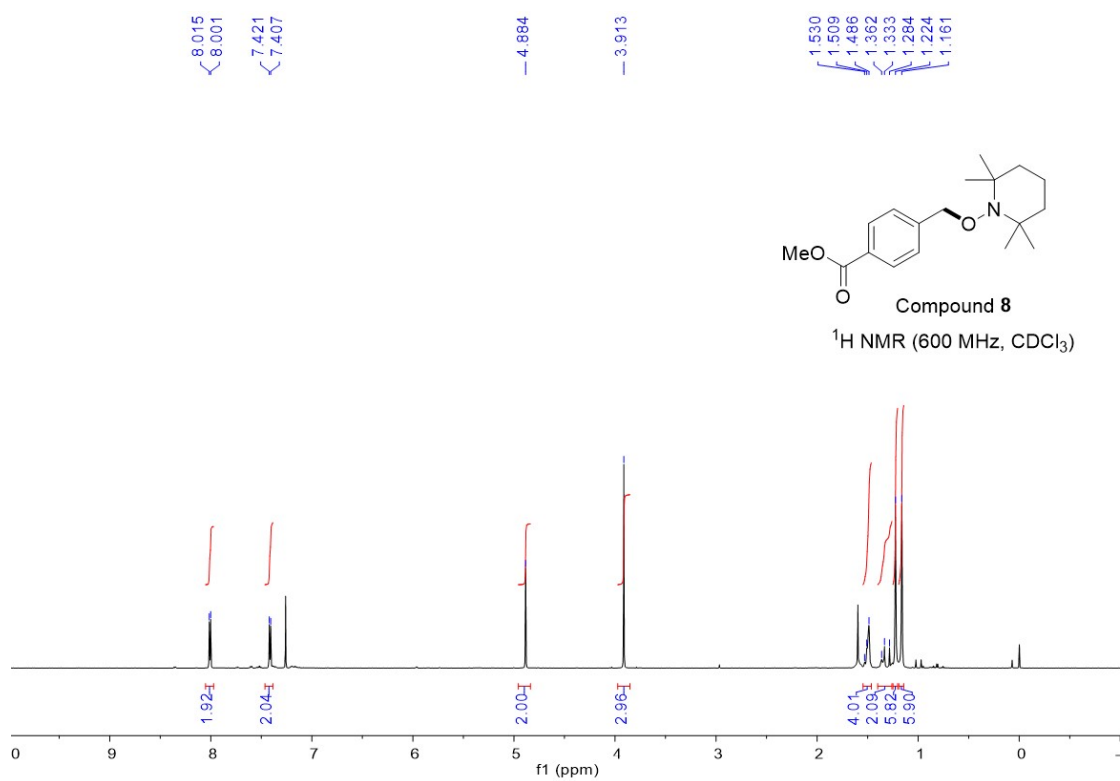



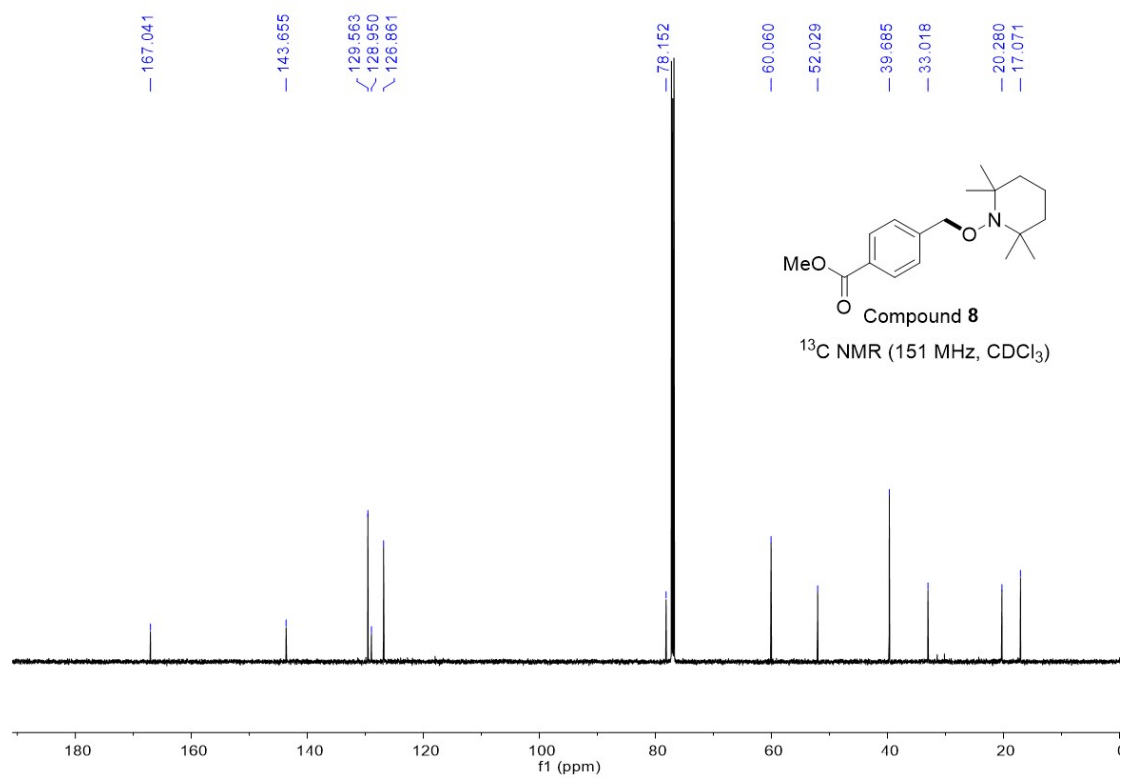

## 9. Crystallographic data for 3a

The compound **3a** was crystalized over a solution of **3a** (80 mg) in CH<sub>2</sub>Cl<sub>2</sub>/petroleum (2 mL/2 mL) at room temperature. The mixed solvent spontaneously evaporates in open air to obtain the crystals of **3a**. Then the crystals were carefully collected and used for X-ray diffraction analysis. The crystal structure was further determined by Bruker D8 QUEST X-ray single crystal diffractometer. The CCDC number of **3a** is 2129581.

### checkCIF/PLATON report

You have not supplied any structure factors. As a result the full set of tests cannot be run.

THIS REPORT IS FOR GUIDANCE ONLY. IF USED AS PART OF A REVIEW PROCEDURE FOR PUBLICATION, IT SHOULD NOT REPLACE THE EXPERTISE OF AN EXPERIENCED CRYSTALLOGRAPHIC REFEREE.

No syntax errors found.    CIF dictionary    Interpreting this report

### Datablock: t1

---

|                        |                                            |                    |                  |
|------------------------|--------------------------------------------|--------------------|------------------|
| Bond precision:        | C-C = 0.0021 A                             | Wavelength=0.71073 |                  |
| Cell:                  | a=5.6133(16)                               | b=11.125(3)        | c=23.100(6)      |
|                        | alpha=91.600(12)                           | beta=90.153(12)    | gamma=90.094(13) |
| Temperature:           | 273 K                                      |                    |                  |
|                        | Calculated                                 | Reported           |                  |
| Volume                 | 1442.0(7)                                  | 1442.0(7)          |                  |
| Space group            | P -1                                       | P -1               |                  |
| Hall group             | -P 1                                       | -P 1               |                  |
| Moiety formula         | C20 H16 O                                  | C20 H16 O          |                  |
| Sum formula            | C20 H16 O                                  | C20 H16 O          |                  |
| Mr                     | 272.33                                     | 272.33             |                  |
| Dx, g cm <sup>-3</sup> | 1.254                                      | 1.254              |                  |
| Z                      | 4                                          | 4                  |                  |
| Mu (mm <sup>-1</sup> ) | 0.076                                      | 0.076              |                  |
| F000                   | 576.0                                      | 576.0              |                  |
| F000'                  | 576.24                                     |                    |                  |
| h, k, lmax             | 7, 14, 30                                  | 7, 14, 30          |                  |
| Nref                   | 6749                                       | 6682               |                  |
| Tmin, Tmax             | 0.977, 0.985                               | 0.721, 0.746       |                  |
| Tmin'                  | 0.977                                      |                    |                  |
| Correction method=     | # Reported T Limits: Tmin=0.721 Tmax=0.746 |                    |                  |
| AbsCorr =              | MULTI-SCAN                                 |                    |                  |
| Data completeness=     | 0.990                                      | Theta(max)=        | 27.656           |
| R(reflections)=        | 0.0495( 4669)                              | wR2(reflections)=  | 0.1355( 6682)    |
| S =                    | 1.070                                      | Npar=              | 379              |

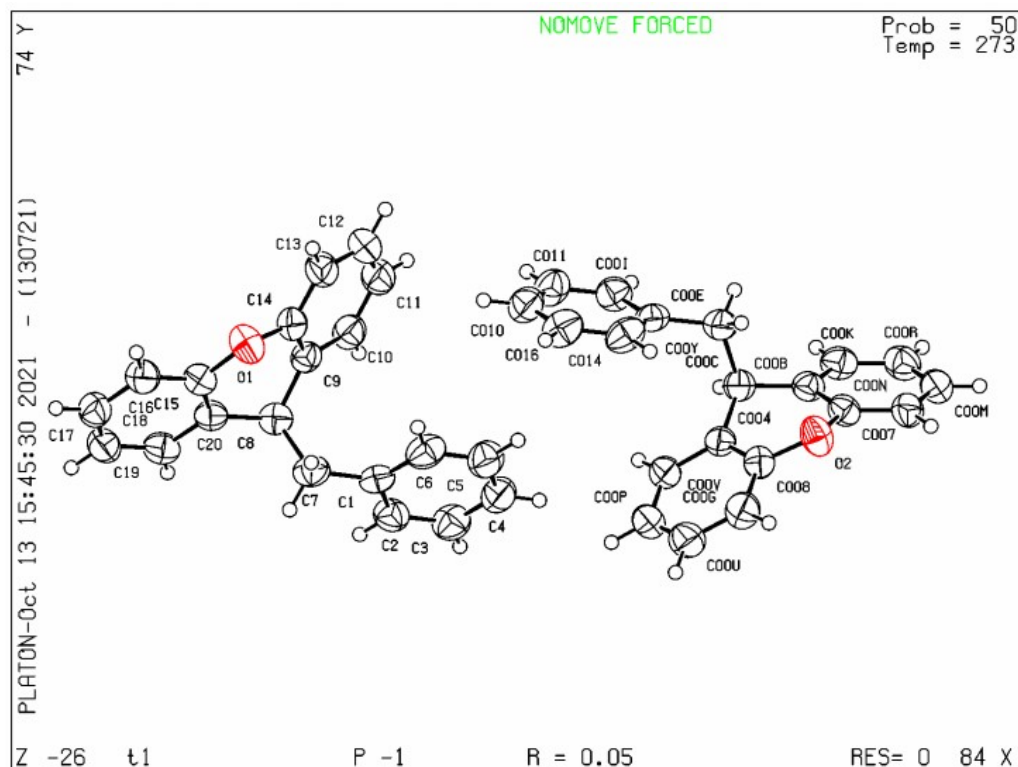

**Figure S5** X-ray structure of **3a** (ORTEP diagram with ellipsoid contour 50% probability)

## 10. Determination of faradaic efficiency

$$(1) \text{ F. E. (\%)} = \frac{n \times F \times \text{mol of product or intermediate formed}}{\text{accumulated charge (C)}} \times 100 \%$$

$$\text{F. E. (\%)} = \frac{2 \times 96485 \text{ C mol}^{-1} \times 0.3 \text{ mmol} \times 10^{-3} \times 81\%}{8 \text{ mA} \times 10^{-3} \times 4 \text{ h} \times 3600} \times 100 \%$$

$$= 40.7 \%$$

The F.E. (%) of the product **3a** was calculated by (1). The F.E. is the proportion of electrons consumed in each electrochemical reaction of the total applied charge and represents the selectivity of the electrochemical system for each reaction. In Eq (1), F is the Faradaic constant (96485 C mol<sup>-1</sup>), and n is the number of electrons required for the production of products. The yield is the proportion of reactant converted to target product.

## 11. DFT calculation for the mechanism proposal

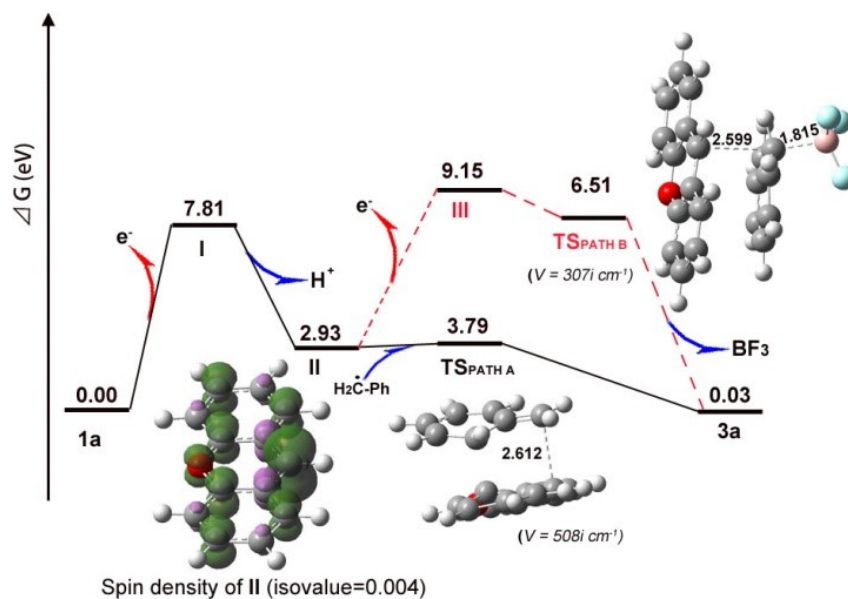

**Figure S6** DFT calculation for the electrochemical benzylic C(sp<sup>3</sup>)-H cross-coupling with organotrifluoroborates

To verify the mechanism proposal in Scheme 3 of the maintext, a density functional theory (DFT) study with the empirical dispersion correction D3 developed by Grimme *et al.*<sup>6,7</sup> was carried out, using the Minnesota density functional (M06)<sup>8,9</sup> with the augmented correlation consistent basis set 6-311+G(d),<sup>10</sup> and the results is listed in Figure S6. In this electrochemical system, the formation of a key intermediate radical **II** on the anode is proposed through successive oxidation reaction and deprotonation. In the case of the organotrifluoroborates salt, the **2a** undergoes anodic oxidation to generate a benzyl radical (Scheme 4). For the path A, the intermediate **II** could couple with the benzyl radical to yield product **3a**, which only requires a calculated energy barrier of only 0.66 eV (for the transition state TS<sub>PATH A</sub>) to finish this radical coupling process. Theoretically, the path B listed in Figure S3 seems to be a barrierless reaction, but higher energy (6.22 eV) is requisite for the following anodic oxidation of **II** into **III** (transition state TS<sub>PATH B</sub>). Remarkably, path A involving the radical coupling of **II** with benzyl radical is a favorable pathway (with the energy barrier 0.66 eV).

## 12. Oxidation potential measurement of **1t** and **1u**

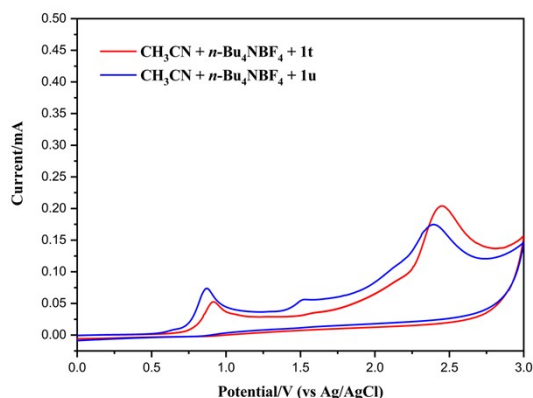

**Fig.S7** A cyclic voltammogram recorded in CH<sub>3</sub>CN with 0.1 M *n*-Bu<sub>4</sub>NBF<sub>4</sub> as the supporting electrolyte. **1t** (1 mM), **1u** (1 mM). Scan direction: From negative to positive.

## 13. References

1. (a) X. Chen, H. Liu, H. Gao, P. Li, T. Miao and H. Li, *J. Org. Chem.*, 2022, **87**, 1056–1064; (b) H. Gao, X. Chen, P.-L. Wang, M.-M. Shi, L.-L. Shang, H.-Y. Guo, H. Li and P. Li, *Org. Chem. Front.*, 2022, **9**, 1911–1916; (c) Z. Shi, S. Chen, Q. Xiao, and D. Yin, *J. Org. Chem.*, 2021, **86**, 3334–3343.
2. J. Luo, B. Hu, W. Wu, M. Hu, T. L. Liu, *Angew. Chem. Int. Ed.*, 2021, **60**, 6107–6116.
3. G. W. Jones, K. T. Chang and H. Shechter, *J. Am. Chem. Soc.*, 1979, **101**, 3906–3916.
4. X. Ji, T. Huang, W. Wu, F. Liang and S. Cao, *Org. Lett.*, 2015, **17**, 5096–5099.
5. H. Yoshida, M. Watanabe, H. Fukushima, J. Ohshita and A. Kunai, *Org. Lett.*, 2004, **6**, 4049–4051.
6. S. Grimme, J. Antony, S. Ehrlich and H. Krieg, *J. Chem. Phys.*, 2010, **132**, 154104.
7. P. Singla, M. Riyaz, S. Singhal and N. Goel, *Phys. Chem. Chem. Phys.*, 2016, **18**, 5597–5604.
8. Y. Zhao and D. G. Truhlar, *Theor. Chem. Acc.* **2007**, *120*, 215–241.
9. Y. Zhao, N. E Schultz and D. G. Truhlar, *J. Chem. Phys.* **2005**, *1236*, 161103.
10. W. J. Hehre, R. Ditchfield and J. Pople, *J. Chem. Phys.* **1972**, *56*, 2257–2261.
